# Supplementary material
Source: publisher figshare collection journal article supplement (https://gsapubs.figshare.com/ndownloader/files/29088324)
Supplement: Supplementary file 1 [file 29088324]

## Sheet: MJ17-1(9)
Spot	f206	U		Th		Pb		Th/U		Isotopic Ratios1									Ages (Ma)1								% conc2
	(%)	(mg.g-1)	2σ	(mg.g-1)	2σ	(mg.g-1)	2σ	calculated	206Pb/204Pb	207Pb/235U	1σ	1σ %	206Pb/238U	1σ	1σ %	Rho	208Pb/232Th	1σ	207Pb/206Pb	2σ	206Pb/238U	2σ	207Pb/235U	2σ	208Pb/232Th	2σ
Spot57.FIN2	0.237611	244.9	6.5	270.5	6.6	145.1	5	1.10453	7870	3376	0.091	0.0026955	0.1969	0.0056	2.84408	0.45101	0.0543	0.0022	1925	31	1157	30	1498	21	720	140	60.1039
Spot58.FIN2	0.639316	59.9	1.9	93.1	2.9	35.4	2.4	1.55426	2925	5.24	0.21	4.00763	0.293	0.011	3.75427	0.28528	0.0388	0.0027	2028	45	1639	56	1863	34	160	400	80.8185
Spot59.FIN2	0.313233	111.9	5.2	137.9	5.4	108.7	5.6	1.23235	5970	5.22	0.14	2.68199	0.3205	0.0088	2.74571	0.48592	0.0744	0.0031	1791	27	1783	43	1841	23	1120	270	99.5533
Spot63.FIN2	0.357211	117.4	2.7	128.8	3.3	77.6	3.8	1.0971	5235	4.44	0.14	3.15315	0.2744	0.0087	3.17055	0.51085	0.0681	0.0036	1749	37	1562	44	1720	26	770	360	89.3082
Spot65.FIN2	0.251007	131.1	7.9	153.4	7.9	152	10	1.1701	7450	5.14	0.14	2.72374	0.323	0.0086	2.66254	0.52486	0.086	0.0029	1757	29	1795	42	1839	23	1430	270	102.163
Spot67.FIN2	0.178947	178	15	217	16	236	20	1.2191	10450	5.31	0.17	3.20151	0.3198	0.0095	2.97061	0.54167	0.0777	0.0026	1848	33	1782	46	1856	27	1350	190	96.4286
Spot68.FIN2	0.209289	223.3	6.7	278.5	6.5	159.7	6.3	1.2472	8935	4.11	0.13	3.16302	0.2534	0.0081	3.19653	0.58479	0.065	0.0027	1710	30	1454	42	1648	26	1100	160	85.0292
Spot69.FIN2	0.355852	114.6	3.3	176.1	4.6	124.7	5.5	1.53665	5255	4.73	0.14	2.95983	0.2846	0.0082	2.88124	0.40962	0.0766	0.0028	1819	33	1609	41	1769	26	1580	220	88.4552
Spot70.FIN2	0.48072	66	4.2	122.4	6.7	117.2	9.2	1.85455	3890	4.98	0.17	3.41365	0.3213	0.0099	3.08123	0.3985	0.0764	0.0029	1774	42	1786	48	1813	30	1450	310	100.676
Spot71.FIN2	0.316145	136.2	3.2	188.4	4.5	119.7	4.4	1.38326	5915	4.42	0.15	3.39367	0.2673	0.009	3.367	0.46065	0.0732	0.0031	1780	35	1529	46	1703	29	1180	230	85.8989
Spot72.FIN2	0.836689	55.9	1.8	91.5	2.8	55.6	2.8	1.63685	2235	4.16	0.18	4.32692	0.2484	0.009	3.62319	0.40711	0.0618	0.003	1867	47	1422	45	1660	35	740	450	76.165
Spot74.FIN2	0.475222	87.5	1.9	79.2	2.1	56.5	2.7	0.905143	3935	4.63	0.17	3.67171	0.2807	0.0091	3.2419	0.37275	0.0807	0.0043	1768	44	1584	46	1751	31	650	500	89.5928
Spot75.FIN2	0.457213	90.7	2.7	157.4	4.1	79.4	4.1	1.73539	4090	4.43	0.17	3.83747	0.2682	0.0096	3.57942	0.50497	0.0452	0.0023	1847	39	1533	49	1706	31	820	220	82.9995
Spot76.FIN2	0.176415	200	18	244	20	243	25	1.22	10600	4.81	0.15	3.1185	0.301	0.01	3.32226	0.5247	0.0648	0.0025	1762	36	1686	50	1775	26	1340	170	95.6867
Spot78.FIN2	0.138519	243	19	311	21	343	27	1.27984	13500	5.07	0.14	2.76134	0.3248	0.0097	2.98645	0.54315	0.0723	0.0024	1746	29	1810	47	1824	24	1460	140	103.666
Spot80.FIN2	0.199786	175.3	8.1	205.9	8.2	180	8.1	1.17456	9360	5.25	0.12	2.28571	0.328	0.0074	2.2561	0.42741	0.0786	0.0028	1721	27	1819	36	1854	20	1740	270	105.694
Spot82.FIN2	0.295886	146.3	2.7	186.2	3.6	115.1	4.3	1.27273	6320	4.62	0.14	3.0303	0.2755	0.0085	3.0853	0.55378	0.0683	0.0028	1767	33	1570	43	1745	25	1170	200	88.8512
Spot83.FIN2	0.410538	116.2	3.6	177.4	5	94.9	4.1	1.52668	4555	4.19	0.14	3.34129	0.2554	0.0079	3.09319	0.44472	0.0579	0.0025	1750	38	1462	40	1675	27	1010	220	83.5429
Spot84.FIN2	0.597444	69.9	1.8	111.2	2.9	79.3	3.6	1.59084	3130	4.85	0.2	4.12371	0.287	0.011	3.83275	0.38406	0.0806	0.0042	1764	45	1619	52	1782	34	1040	410	91.78
Spot85.FIN2	0.257931	125.6	9.7	112.2	7.8	117.2	9.6	0.893312	7250	5.28	0.15	2.84091	0.3327	0.0089	2.67508	0.43458	0.0831	0.0034	1753	30	1843	43	1863	25	1410	410	105.134
Spot86.FIN2	0.278896	141.6	3.9	220	5.8	162.4	6.1	1.55367	6705	5.13	0.15	2.92398	0.3076	0.0096	3.12094	0.44297	0.0856	0.0033	1736	34	1725	46	1844	24	1550	210	99.3664
Spot89.FIN2	0.133571	247	13	244	10	265	13	0.987854	14000	5.19	0.15	2.89017	0.3313	0.0098	2.95804	0.63533	0.0787	0.0026	1694	26	1835	48	1847	24	1420	140	108.323
Spot90.FIN2	0.290147	205.7	3.6	339.4	6.9	189.2	6.3	1.64998	6445	3.46	0.11	3.17919	0.201	0.006	2.98507	0.50081	0.0616	0.0024	1796	31	1175	32	1514	26	1190	130	65.4232
Spot91.FIN2	1.00809	44.6	1.9	46.6	2.2	29.2	2.4	1.04484	1855	4.23	0.21	4.96454	0.264	0.012	4.54545	0.31109	0.0674	0.0051	1727	58	1494	60	1665	41	1490	840	86.5084
Spot93.FIN2	0.308072	134.8	3.4	239.5	6.5	160.1	6.6	1.77671	6070	4.87	0.16	3.28542	0.2888	0.0092	3.1856	0.54488	0.0742	0.0028	1759	32	1637	46	1798	28	1390	160	93.0642
Spot94.FIN2	42.5993	973	26	1261	31	265	9.1	1.29599	43.8974	1525	0.032	0.00209836	0.02755	0.00074	2.68603	0.36219	0.02257	0.00071	3717	27	175.1	4.6	937	13	93	42	4.71079
Spot97.FIN2	0.424518	369.7	9.3	903	22	276	10	2.44252	4405	2302	0.064	0.00278019	0.075	0.0021	2.8	0.41847	0.0309	0.0011	2795	37	465	13	1209	19	444	43	16.6369
Spot100.FIN2	0.277037	127.7	9.5	120.5	7.9	123	11	0.943618	6750	5.12	0.14	2.73438	0.3135	0.0083	2.64753	0.48993	0.0809	0.0031	1749	28	1753	40	1837	22	1450	310	100.229
Spot101.FIN2	0.123432	267	22	239	19	261	25	0.895131	15150	5.43	0.16	2.94659	0.332	0.011	3.31325	0.56241	0.0702	0.0026	1773	33	1837	51	1881	24	1250	160	103.61
Spot103.FIN2	0.760163	63.6	1.8	119.2	2.8	66.4	3.1	1.87421	2460	4.38	0.19	4.3379	0.2472	0.0095	3.84304	0.42028	0.0608	0.0031	1878	51	1424	48	1678	36	720	320	75.8253
Spot104.FIN2	0.57716	330	13	398	14	79.8	4.8	1.20606	3240	1359	0.047	0.00345843	0.0631	0.0023	3.64501	0.33265	0.02162	0.00099	2222	38	394	14	866	20	250	120	17.7318
Spot105.FIN2	0.335125	326	15	434	19	128.5	7	1.33129	5580	2105	0.066	0.00313539	0.107	0.0031	2.8972	0.3715	0.0253	0.0011	2071	34	654	18	1140	22	320	100	31.5789
Spot106.FIN2	0.543605	83.2	2.1	134.8	3.2	82.2	3.4	1.62019	3440	4.58	0.17	3.71179	0.2656	0.0082	3.08735	0.37733	0.067	0.0031	1822	42	1509	41	1747	31	850	330	82.8211
Spot107.FIN2	0.511628	90.6	2.4	101.2	2.7	63.1	3.6	1.117	3655	4.95	0.21	4.24242	0.274	0.011	4.0146	0.57363	0.0722	0.0043	1847	40	1549	54	1781	37	1210	450	83.8657
Spot109.FIN2	0.588976	59	4.4	71.5	4.5	67.7	6	1.21186	3175	5.06	0.19	3.75494	0.312	0.011	3.52564	0.33576	0.0737	0.0036	1788	43	1732	52	1805	33	1870	470	96.868
Spot110.FIN2	0.593651	76.3	2	65.7	2.1	43.5	2.4	0.861075	3150	4.59	0.2	4.3573	0.279	0.01	3.58423	0.49389	0.0753	0.005	1698	49	1577	52	1723	35	1640	580	92.874
Spot112.FIN2	0.821978	56	1.9	117.2	3.5	37.8	2.4	2.09286	2275	4.81	0.24	4.9896	0.274	0.011	4.0146	0.40787	0.0386	0.0025	1846	52	1555	57	1774	41	380	430	84.2362
Spot113.FIN2	0.198936	252	6.4	256	6.2	188.9	7	1.01587	9400	4.72	0.11	2.33051	0.25	0.006	2.4	0.4243	0.0768	0.0027	1948	27	1439	30	1769	20	1250	140	73.8706
Spot114.FIN2	0.23375	275.7	9.6	432	14	151.1	6.6	1.56692	8000	3266	0.09	0.00275566	0.1907	0.0054	2.83167	0.60373	0.0349	0.0014	1758	25	1121	29	1470	21	615	95	63.7656
Spot115.FIN2	0.249167	378	11	347.9	8.7	149.3	5.8	0.92037	7505	2763	0.075	0.00271444	0.1318	0.0036	2.73141	0.47036	0.0413	0.0015	2171	28	796	20	1338	20	460	130	36.6651
Spot116.FIN2	0.220129	216.7	7.8	300.6	9.3	179.2	7.8	1.38717	8495	4.37	0.13	2.97483	0.2734	0.0086	3.14557	0.52557	0.0682	0.0027	1688	27	1551	43	1705	24	1270	140	91.8839
Spot117.FIN2	0.343434	129.9	3.9	263.7	8	169.9	8.4	2.03002	5445	4.96	0.17	3.42742	0.2824	0.0086	3.04533	0.46109	0.0664	0.0027	1846	36	1602	43	1808	29	1030	180	86.7822
Spot118.FIN2	0.345018	136.8	3.3	153	3.6	91.6	4.1	1.11842	5420	4.62	0.17	3.67965	0.2727	0.0098	3.59369	0.4978	0.0607	0.003	1765	39	1548	50	1735	30	790	280	87.7054
Spot119.FIN2	0.498003	227.6	5.8	355.7	8	108.6	5.6	1.56283	3755	2.78	0.1	3.59712	0.1139	0.004	3.51185	0.43141	0.0361	0.0018	2408	45	692	23	1346	28	650	140	28.7375
Spot120.FIN2	0.132624	269	18	290	17	254	19	1.07807	14100	5.35	0.13	2.42991	0.3379	0.0094	2.78189	0.50061	0.0667	0.0025	1739	28	1865	45	1866	21	1230	170	107.246
Spot121.FIN2	0.119108	308	24	367	25	332	29	1.19156	15700	4.78	0.14	2.92887	0.309	0.0094	3.04207	0.55122	0.0624	0.002	1701	30	1747	47	1779	24	1264	94	102.704
Spot122.FIN2	0.342177	109.4	5.9	133.6	4.9	115.9	7.1	1.22121	5465	5.09	0.17	3.33988	0.3253	0.0098	3.0126	0.44481	0.0651	0.0025	1742	37	1808	47	1822	28	1370	200	103.789
Spot123.FIN2	0.241446	215.6	5.8	167	4	95.9	4.4	0.774583	7745	4.29	0.14	3.2634	0.2514	0.0078	3.10263	0.43244	0.0655	0.0032	1764	35	1449	40	1684	25	1160	270	82.1429
Spot124.FIN2	0.134532	260	17	331	16	335	22	1.27308	13900	5.3	0.13	2.45283	0.3409	0.0086	2.52273	0.54961	0.0804	0.0021	1658	25	1889	41	1868	21	1630	100	113.932
Spot126.FIN2	0.238978	266.5	8.6	234.2	7.9	102.6	5	0.878799	7825	3186	0.098	0.00307596	0.1934	0.0059	3.05067	0.53924	0.0425	0.0019	1745	29	1135	32	1451	24	730	190	65.043
Spot127.FIN2	0.31508	159.9	3.9	141.2	3.4	81.9	4.1	0.883052	5935	4.23	0.13	3.07329	0.2619	0.0093	3.55097	0.51725	0.0668	0.0033	1732	38	1493	47	1682	25	1160	330	86.2009
Spot128.FIN2	0.108406	317	28	376	30	383	39	1.18612	17250	4.68	0.16	3.4188	0.307	0.01	3.25733	0.60796	0.0627	0.0023	1693	33	1711	51	1755	29	1280	130	101.063
Spot129.FIN2	0.121429	265	13	236	11	256	14	0.890566	15400	5.6	0.14	2.5	0.376	0.011	2.92553	0.54483	0.0806	0.0028	1667	26	2047	52	1915	22	1610	130	122.795
Spot130.FIN2	0.570992	94	2.8	138.2	3.9	76.5	4.1	1.47021	3275	3.85	0.15	3.8961	0.2517	0.0086	3.41677	0.39331	0.059	0.0032	1703	46	1444	44	1585	33	1090	310	84.7915
Spot131.FIN2	0.336029	131.1	2.5	111.3	2.6	75.2	3.7	0.84897	5565	5.03	0.18	3.57853	0.2968	0.0099	3.33558	0.51047	0.0785	0.0043	1825	38	1665	48	1821	31	1030	440	91.2329
Spot132.FIN2	0.192784	179	12	298	19	287	21	1.6648	9700	5.04	0.16	3.1746	0.338	0.01	2.95858	0.43677	0.0666	0.0023	1684	38	1882	50	1826	28	1280	160	111.758
Spot133.FIN2	0.303818	124	7.3	130.2	6.9	117.6	8.5	1.05	6155	4.99	0.14	2.80561	0.3242	0.009	2.77606	0.44216	0.0733	0.003	1693	31	1802	44	1815	25	1510	280	106.438
Spot135.FIN2	0.370664	105.4	7.7	102.3	7.4	86.9	7.4	0.970588	5045	4.88	0.14	2.86885	0.3118	0.0083	2.66196	0.37303	0.0741	0.0036	1765	32	1735	40	1791	23	1410	430	98.3003
Spot136.FIN2	0.324371	110.6	5.9	131.5	6.6	112.5	6.6	1.18897	5765	5.17	0.16	3.09478	0.3365	0.0093	2.76374	0.46973	0.0723	0.0031	1722	29	1860	44	1839	27	1110	320	108.014
Spot138.FIN2	0.26506	142.2	7.6	172.6	8.7	149.6	8.3	1.21378	7055	5.08	0.13	2.55906	0.3295	0.0086	2.61002	0.49463	0.0774	0.003	1659	30	1828	42	1826	22	1580	240	110.187
Spot139.FIN2	0.566667	111.5	4.4	218.5	6.8	93.6	6	1.95964	3300	3.6	0.15	4.16667	0.2182	0.0085	3.89551	0.4206	0.0467	0.0022	1769	50	1266	45	1552	33	600	260	71.5659
Spot140.FIN2	0.673874	56.7	3.8	51.2	3.4	44.1	3.4	0.902998	2775	4.79	0.2	4.17537	0.32	0.011	3.4375	0.33123	0.0717	0.0046	1688	51	1777	53	1769	34	2340	680	105.273
Spot142.FIN2	0.162609	223	14	400	27	347	25	1.79372	11500	5.93	0.14	2.36088	0.3563	0.0085	2.38563	0.44883	0.0658	0.0021	1777	25	1957	40	1959	21	1380	200	110.129
Spot143.FIN2	0.232298	173	10	268	18	229	16	1.54913	8050	5.13	0.16	3.11891	0.3249	0.009	2.77008	0.37282	0.0608	0.0023	1730	35	1807	43	1835	26	990	200	104.451
Spot144.FIN2	0.393684	100.1	6.8	195	13	181	13	1.94805	4750	5.26	0.22	4.18251	0.332	0.013	3.91566	0.56206	0.0668	0.0032	1733	45	1839	65	1855	36	1330	250	106.117
Spot146.FIN2	0.357895	146.3	6.5	96.7	4.1	79	5.1	0.660971	5225	4.67	0.13	2.78373	0.2587	0.0079	3.05373	0.42061	0.0726	0.0039	1901	37	1477	40	1768	24	920	440	77.6959
Spot148.FIN2	0.673874	64.3	1.9	100	3.4	80	4.1	1.55521	2775	6	0.26	4.33333	0.339	0.014	4.12979	0.39427	0.0948	0.0051	1786	51	1874	66	1976	39	1560	440	104.927
Spot149.FIN2	0.292187	141	11	281	19	218	20	1.99291	6400	5.14	0.15	2.91829	0.3149	0.0093	2.95332	0.41057	0.0594	0.002	1651	36	1762	45	1841	25	1230	150	106.723
Spot151.FIN2	0.285933	129.4	7.3	208	11	194	14	1.60742	6540	5.9	0.2	3.38983	0.364	0.012	3.2967	0.39253	0.0631	0.0024	1682	40	1993	56	1945	30	1270	180	118.49
Spot152.FIN2	0.107163	370	30	518	38	460	47	1.4	17450	5.33	0.15	2.81426	0.3233	0.0098	3.03124	0.62147	0.0551	0.0019	1669	27	1805	47	1868	24	1156	85	108.149
Spot155.FIN2	0.249333	219.1	6.6	244.2	6.8	162.3	6.8	1.11456	7500	5.05	0.15	2.9703	0.2726	0.0077	2.82465	0.54671	0.0633	0.0024	1771	30	1553	40	1824	24	1080	190	87.6906
Spot156.FIN2	0.587127	98.1	3.4	242.6	6.9	148	7	2.47299	3185	4.63	0.19	4.10367	0.266	0.011	4.13534	0.44177	0.0633	0.0026	1722	53	1498	56	1733	34	1000	200	86.9919
Spot159.FIN2	0.249666	215.2	5.9	234	6.9	133.7	6.5	1.08736	7490	5.77	0.18	3.11958	0.2927	0.0083	2.83567	0.5027	0.0657	0.0028	1841	29	1650	41	1942	26	1010	220	89.6252
Spot160.FIN2	0.150201	304	22	391	23	299	27	1.28618	12450	5.34	0.15	2.80899	0.324	0.01	3.08642	0.55425	0.0522	0.002	1653	33	1818	49	1877	23	1070	95	109.982
Spot161.FIN2	0.155833	262	11	246.9	9.2	234	12	0.942366	12000	5.97	0.17	2.84757	0.359	0.01	2.78552	0.59936	0.0736	0.0022	1624	29	1971	48	1965	24	1420	160	121.367
Spot162.FIN2	0.146667	317	25	709	51	544	52	2.23659	12750	5.22	0.14	2.68199	0.3057	0.0081	2.64966	0.5167	0.056	0.0014	1680	28	1720	39	1863	22	1115	71	102.381
Spot163.FIN2	0.272396	152.9	8.9	228	13	177	10	1.49117	6865	5.83	0.16	2.74443	0.3523	0.0097	2.75334	0.49503	0.0706	0.0026	1614	29	1934	46	1932	24	1440	220	119.827
Spot164.FIN2	0.229448	173	10	153	10	137.2	9.5	0.884393	8150	6.99	0.18	2.57511	0.3856	0.0093	2.41183	0.51871	0.0844	0.004	1779	27	2091	43	2097	22	1450	350	117.538
Spot165.FIN2	0.232298	184	14	149.2	9.7	140	11	0.81087	8050	5.42	0.18	3.32103	0.344	0.011	3.19767	0.51984	0.0683	0.0029	1598	39	1902	52	1883	30	1310	320	119.024
Spot167.FIN2	0.554896	148.4	4.7	137.2	4.1	57.9	3.3	0.924528	3370	3.01	0.11	3.65449	0.1945	0.0067	3.44473	0.3507	0.0444	0.0025	1472	45	1137	36	1401	29	740	360	77.2418
Spot168.FIN2	0.225301	172	14	171	14	131	12	0.994186	8300	6.89	0.23	3.33817	0.396	0.013	3.28283	0.45886	0.0581	0.0029	1774	34	2140	57	2083	29	1310	340	120.631
Spot169.FIN2	0.396186	93.9	6.3	112	7.7	98.1	7.4	1.19276	4720	7.29	0.28	3.84088	0.407	0.014	3.4398	0.41221	0.0698	0.0038	1836	42	2190	62	2135	33	1310	380	119.281
Spot171.FIN2	0.316413	130.7	3.5	135.4	4	133.4	4.9	1.03596	5910	6.13	0.24	3.91517	0.373	0.013	3.48525	0.5903	0.0763	0.0032	1696	36	2027	62	1976	34	1390	240	119.517
Spot173.FIN2	0.147244	288	33	467	48	405	56	1.62153	12700	5.05	0.16	3.16832	0.324	0.011	3.39506	0.52426	0.0548	0.0022	1623	36	1807	54	1826	27	1110	110	111.337
Spot174.FIN2	0.310889	142.6	9.7	213	14	173	13	1.49369	6015	5.48	0.15	2.73723	0.3396	0.0094	2.76796	0.43964	0.0704	0.0027	1705	32	1878	44	1886	23	1610	240	110.147
Spot177.FIN2	0.312971	147.1	8.5	107.7	5.7	83.2	6	0.732155	5975	4.78	0.18	3.76569	0.32	0.011	3.4375	0.48915	0.0607	0.0032	1626	40	1783	54	1783	30	920	450	109.656
Spot178.FIN2	0.412804	102.2	9.1	141	11	97.7	8.9	1.37965	4530	5.47	0.18	3.29068	0.353	0.01	2.83286	0.34979	0.059	0.003	1660	41	1930	50	1891	28	1240	440	116.265
Spot181.FIN2	1.19108	49.1	1.3	98	2.6	44.1	2.8	1.99593	1570	4.93	0.25	5.07099	0.286	0.013	4.54545	0.43114	0.0518	0.0034	1771	61	1598	63	1778	43	400	560	90.2315
Spot182.FIN2	0.47765	91.9	5.7	124.7	7.4	102.6	7.9	1.35691	3915	5.54	0.18	3.2491	0.339	0.01	2.94985	0.36617	0.0682	0.0028	1735	40	1879	48	1898	28	940	370	108.3
Spot183.FIN2	0.622296	69.3	4	93.9	5.3	80.2	6	1.35498	3005	5.38	0.21	3.90335	0.349	0.012	3.4384	0.44853	0.0756	0.0038	1627	50	1909	55	1863	33	1400	490	117.333
Spot184.FIN2	31.4519	673	19	1791	48	314	13	2.66122	59.4558	2121	0.05	0.00235738	0.056	0.0016	2.85714	0.44168	0.01803	0.00049	3109	28	350.2	9.6	1149	16	120	32	11.2641
Spot185.FIN2	0.318841	147.6	8.7	222	12	179	13	1.50407	5865	5.24	0.15	2.8626	0.3217	0.0088	2.73547	0.50393	0.0707	0.0023	1627	32	1799	43	1854	24	1260	220	110.572
Spot186.FIN2	0.385965	141.2	9.4	185	11	132	11	1.3102	4845	4.5	0.16	3.55556	0.2681	0.0092	3.43156	0.47524	0.0535	0.0023	1714	39	1539	47	1719	29	890	240	89.79
Spot187.FIN2	0.56072	80	6.1	159	11	121.2	9.6	1.9875	3335	5.34	0.28	5.24345	0.341	0.016	4.69208	0.47966	0.059	0.0031	1694	56	1871	78	1892	45	1260	380	110.449
Spot188.FIN2	0.513736	84.5	5.5	100.3	6.2	82.5	6.1	1.18698	3640	5.41	0.18	3.32717	0.345	0.01	2.89855	0.44129	0.074	0.0038	1588	37	1894	50	1886	30	1440	490	119.27
Spot190.FIN2	0.386763	122.2	7.8	140.2	8.4	100.6	8.3	1.1473	4835	5.35	0.16	2.99065	0.318	0.0091	2.86164	0.39885	0.0626	0.0026	1725	35	1775	44	1861	24	1030	330	102.899
Spot191.FIN2	0.155187	276	16	207	11	169	12	0.75	12050	5.68	0.13	2.28873	0.339	0.0082	2.41888	0.53486	0.0678	0.0024	1631	23	1875	39	1921	19	1170	190	114.96
Spot192.FIN2	0.319932	142.9	8.7	233	11	215	15	1.63051	5845	5.85	0.21	3.58974	0.335	0.012	3.58209	0.54454	0.0682	0.0023	1738	36	1854	57	1942	32	1110	190	106.674
Spot196.FIN2	0.170776	235	13	398	19	385	24	1.69362	10950	6.11	0.22	3.60065	0.357	0.012	3.36134	0.64813	0.0705	0.0025	1665	33	1948	59	1988	33	1290	110	116.997
Spot197.FIN2	0.239437	241.5	8.4	206.7	6.2	116.7	5.8	0.855901	7810	4.93	0.14	2.83976	0.2812	0.0082	2.91607	0.4659	0.0635	0.0027	1647	30	1588	41	1800	25	880	270	96.4177
Spot199.FIN2	0.336937	129	11	154	13	132	14	1.1938	5550	5.48	0.18	3.28467	0.329	0.012	3.64742	0.46646	0.058	0.0028	1602	39	1845	55	1891	30	1220	270	115.169
Spot200.FIN2	0.39745	102.7	5.5	114.6	6.1	96.7	6.2	1.11587	4705	6.06	0.19	3.13531	0.371	0.01	2.69542	0.48405	0.0749	0.0033	1586	36	2023	48	1956	28	1670	380	127.554
Spot202.FIN2	0.40919	99.9	6.7	109.7	7	91.8	6.6	1.0981	4570	5.84	0.18	3.08219	0.354	0.01	2.82486	0.4558	0.072	0.0034	1614	34	1942	48	1947	26	1240	480	120.322
Spot204.FIN2	0.355176	124.5	9.3	100.7	7.5	80.2	6.9	0.808835	5265	5.35	0.18	3.36449	0.332	0.011	3.31325	0.36047	0.0581	0.0035	1666	41	1848	53	1870	29	1060	520	110.924
Spot205.FIN2	0.695167	66.4	4.2	143	10	97	11	2.15361	2690	5.83	0.21	3.60206	0.327	0.01	3.0581	0.32375	0.0511	0.0023	1791	43	1809	50	1938	30	920	300	101.005
Spot206.FIN2	0.12678	339	21	227	12	199	16	0.669617	14750	5.32	0.15	2.81955	0.333	0.01	3.003	0.64332	0.0595	0.0025	1571	27	1843	49	1865	25	1150	160	117.314
Spot207.FIN2	0.582555	73.1	3.5	84.7	4	73	4.7	1.15869	3210	5.99	0.21	3.50584	0.347	0.011	3.17003	0.35483	0.0739	0.0035	1716	41	1904	50	1968	30	1110	430	110.956
Spot209.FIN2	0.366308	119.9	6.3	110.3	5	106	5.8	0.919933	5105	5.8	0.17	2.93103	0.3432	0.0093	2.70979	0.47487	0.0859	0.0038	1634	33	1894	44	1939	25	1530	380	115.912
Spot210.FIN2	0.441038	112.5	6.2	209	9.9	121.2	7.9	1.85778	4240	5.25	0.16	3.04762	0.3108	0.0085	2.73488	0.4602	0.0471	0.0018	1694	31	1737	41	1856	26	850	180	102.538
Spot211.FIN2	0.230864	189	12	359	20	257	22	1.89947	8100	5.35	0.14	2.61682	0.3294	0.0082	2.48937	0.53361	0.0569	0.0016	1540	29	1842	41	1875	22	1060	140	119.61
Spot212.FIN2	0.419753	279.4	8	349.5	9.7	167.8	7.8	1.25089	4455	3.27	0.1	3.0581	0.1342	0.0045	3.3532	0.43712	0.0516	0.0022	2210	37	811	26	1469	24	810	160	36.6968
Spot214.FIN2	0.584375	73.6	4.6	86.8	6	70.6	4.9	1.17935	3200	5.99	0.25	4.17362	0.361	0.013	3.60111	0.43376	0.0654	0.0037	1626	48	1974	59	1947	35	1090	550	121.402
Spot215.FIN2	0.129412	308	15	551	22	553	21	1.78896	14450	6.45	0.19	2.94574	0.371	0.01	2.69542	0.56873	0.0707	0.0024	1682	35	2028	49	2030	26	1349	71	120.571
Spot216.FIN2	0.142748	302	19	451	23	381	33	1.49338	13100	5.38	0.17	3.15985	0.323	0.011	3.40557	0.64692	0.054	0.0021	1589	30	1799	51	1876	27	990	100	113.216
Spot218.FIN2	0.304065	152	17	129	15	110	13	0.848684	6150	5.66	0.2	3.53357	0.338	0.01	2.95858	0.41225	0.0619	0.0038	1589	38	1867	49	1910	30	1420	440	117.495
Spot219.FIN2	0.208589	531	19	623	19	190.4	8.4	1.17326	8965	2464	0.08	0.00324675	0.144	0.0041	2.84722	0.62326	0.0296	0.0011	1528	28	863	23	1243	23	515	71	56.4791
Spot220.FIN2	0.238217	163.9	9.8	131	7.6	125.4	9.2	0.799268	7850	6.04	0.15	2.48344	0.3626	0.0082	2.26145	0.41753	0.0739	0.003	1571	29	1985	39	1973	22	1270	320	126.353
Spot222.FIN2	0.223952	187	12	189	11	185	14	1.0107	8350	5.9	0.17	2.88136	0.3516	0.0097	2.75882	0.52648	0.0703	0.0028	1535	32	1944	46	1954	24	1240	230	126.645
Spot225.FIN2	0.2125	199	13	236	13	207	15	1.18593	8800	5.8	0.16	2.75862	0.347	0.01	2.88184	0.47665	0.0604	0.0022	1633	34	1914	48	1942	24	1070	190	117.208
Spot226.FIN2	0.216185	227	17	370	24	287	30	1.62996	8650	4.96	0.13	2.62097	0.2963	0.0079	2.66622	0.55601	0.053	0.0017	1569	29	1676	40	1814	21	950	130	106.82
Spot227.FIN2	0.12678	316	19	479	24	460	38	1.51582	14750	6.06	0.18	2.9703	0.35	0.011	3.14286	0.63872	0.0609	0.002	1663	29	1926	52	1973	26	1216	79	115.815
Spot228.FIN2	0.282691	340.5	9.6	414	10	195.9	8.4	1.21586	6615	3.84	0.12	3.125	0.1688	0.0057	3.37678	0.53122	0.043	0.0017	2152	36	999	31	1603	24	550	110	46.4219
Spot229.FIN2	0.163319	277	20	477	28	393	36	1.72202	11450	5.17	0.16	3.09478	0.3273	0.0098	2.99419	0.53605	0.0531	0.0018	1529	32	1816	48	1847	27	1024	95	118.77
Spot230.FIN2	0.628571	61.5	5.5	74.5	6.6	61.1	5.6	1.21138	2975	6.73	0.29	4.30906	0.405	0.014	3.45679	0.47813	0.0912	0.0094	1699	42	2162	62	2068	39	1370	860	127.251
Spot232.FIN2	0.461159	94.4	5.7	91.3	5.3	82.9	6.5	0.967161	4055	5.62	0.18	3.20285	0.353	0.011	3.11615	0.44801	0.0691	0.0034	1576	41	1940	53	1904	28	1430	420	123.096
Spot236.FIN2	0.236709	188	11	228	13	165	12	1.21277	7900	5.74	0.16	2.78746	0.3697	0.0097	2.62375	0.43418	0.0567	0.0022	1549	35	2027	46	1932	24	980	190	130.859
Spot237.FIN2	0.232298	186	14	258	21	199	18	1.3871	8050	6.21	0.16	2.57649	0.3804	0.0088	2.31335	0.48733	0.0614	0.0022	1618	28	2069	41	1989	22	1090	230	127.874
Spot238.FIN2	0.159829	313	16	414	18	312	21	1.32268	11700	5.05	0.11	2.17822	0.3263	0.0078	2.39044	0.62276	0.0632	0.0018	1516	21	1817	38	1823	19	1282	97	119.855
Spot239.FIN2	0.494709	102.2	6.6	179	10	136	11	1.75147	3780	4.98	0.16	3.21285	0.318	0.0088	2.7673	0.4036	0.0579	0.002	1620	34	1786	43	1806	28	850	290	110.247
Spot240.FIN2	0.386364	136.8	7.4	201	10	138.4	9.6	1.4693	4840	4.9	0.15	3.06122	0.3123	0.0087	2.78578	0.35146	0.06	0.0023	1593	34	1748	42	1791	26	960	260	109.73
Spot241.FIN2	0.300885	161.8	7.6	325	12	236	13	2.00865	6215	5.31	0.13	2.44821	0.3392	0.0083	2.44693	0.41821	0.0636	0.0018	1561	30	1876	39	1865	21	1340	120	120.179
Spot242.FIN2	0.358238	132.9	8.7	184	11	136	12	1.3845	5220	5	0.16	3.2	0.331	0.011	3.32326	0.55363	0.0638	0.0027	1564	33	1822	51	1821	27	1100	270	116.496
Spot243.FIN2	0.251007	209	12	235	10	173	12	1.1244	7450	5.14	0.13	2.52918	0.3272	0.0088	2.68949	0.52291	0.061	0.002	1577	29	1815	42	1828	22	1110	170	115.092
Spot244.FIN2	0.691312	105	3.9	130.4	4.3	52.9	3.8	1.2419	2705	3.75	0.18	4.8	0.24	0.011	4.58333	0.42127	0.0439	0.0028	1602	57	1376	54	1573	38	620	410	85.8926
Spot245.FIN2	0.259722	179	11	204	12	157	13	1.13966	7200	5.8	0.14	2.41379	0.3542	0.0092	2.5974	0.49168	0.0632	0.0023	1646	28	1946	44	1936	21	1350	200	118.226
Spot246.FIN2	0.474619	133.8	7.4	112.8	5.9	72.5	5.7	0.843049	3940	4.33	0.12	2.77136	0.2626	0.0077	2.93222	0.38208	0.0555	0.0026	1685	34	1504	39	1686	23	650	390	89.2582
Spot247.FIN2	0.521618	95.1	6.6	111.3	7.1	74.2	7.8	1.17035	3585	4.79	0.18	3.75783	0.314	0.01	3.18471	0.48716	0.0564	0.0028	1581	38	1757	51	1769	32	240	440	111.132
Spot248.FIN2	0.57362	82.3	5.5	115.1	7.6	95.8	7.8	1.39854	3260	5.12	0.19	3.71094	0.335	0.01	2.98507	0.34482	0.0664	0.003	1579	41	1852	48	1827	32	840	390	117.289
Spot249.FIN2	0.29944	1361	48	2637	88	295	13	1.93755	6245	0.934	0.022	2.35546	0.04279	0.00099	2.31362	0.43693	0.01113	0.00032	2174	27	270.1	6.1	665	12	134	23	12.4241
Spot250.FIN2	0.442604	105.2	6.3	121.8	7.1	90.6	6.3	1.15779	4225	5.4	0.16	2.96296	0.3592	0.0094	2.61693	0.4043	0.0676	0.003	1528	34	1987	44	1878	27	910	420	130.039
Spot251.FIN2	0.159829	279	23	350	30	272	25	1.25448	11700	5.14	0.14	2.72374	0.3331	0.0093	2.79195	0.49055	0.058	0.0021	1580	27	1851	45	1842	23	1090	170	117.152
Spot252.FIN2	0.238217	208	14	367	21	247	24	1.76442	7850	4.75	0.15	3.15789	0.3145	0.0097	3.08426	0.64777	0.0505	0.0017	1569	25	1767	48	1764	27	1030	120	112.62
Spot254.FIN2	0.47044	99.2	5.8	114.7	6.8	85.4	6.8	1.15625	3975	5.03	0.17	3.37972	0.3354	0.0096	2.86225	0.42722	0.0639	0.003	1545	39	1862	47	1814	28	1000	400	120.518
Spot255.FIN2	0.427918	147.9	4.8	228	6.5	104.2	5.1	1.54158	4370	4.06	0.13	3.20197	0.2652	0.0085	3.20513	0.38323	0.0496	0.0023	1543	42	1506	42	1644	27	800	220	97.6021
Spot256.FIN2	0.25529	422	14	662	20	177.8	7.9	1.56872	7325	2456	0.077	0.00313518	0.1547	0.0051	3.2967	0.57595	0.0264	0.001	1617	33	925	28	1257	23	492	76	57.2047
1 data not corrected for common-Pb
2 Concordance calculated as (206Pb-238U age/207Pb-206Pb age)*100
f206c = the proportion of the 206Pb ion beam that is common, calculated as (206Pb204Pbmodel/206Pb204Pb measured)* 100
where 206Pb204Pb measured = (Stacey and Kramers, 1975) 206Pb/204Pb ratio at the apparent (non-common Pb corrected) 207Pb/206Pb age
	Grains excluded from the analysis due Pb loss

## Sheet: MJ17-1(1)B
Spot	f206	U		Th		Pb		Th/U		Isotopic Ratios1									Ages (Ma)1								% conc2
	(%)	(mg.g-1)	2σ	(mg.g-1)	2σ	(mg.g-1)	2σ	calculated	206Pb/204Pb	207Pb/235U	1σ	1σ %	206Pb/238U	1σ	1σ %	Rho	208Pb/232Th	1σ	207Pb/206Pb	2σ	206Pb/238U	2σ	207Pb/235U	2σ	208Pb/232Th	2σ
Spot123.FIN2	0.305057	155.6	1.9	89.1	1.3	40.71	0.62	0.572622	6130	2.295	0.024	1.04575	0.1698	0.0013	0.765607	0.86312	0.04896	0.00051	1311.2	8.5	977.1	7.1	1066	7.3	798	48	74.5195
Spot117.FIN2	0.0956522	592	17	353.9	5.2	113.4	3.2	0.597804	19550	1.077	0.023	2.13556	0.1217	0.0023	1.88989	0.41168	0.03392	0.00088	745	24	738	13	744	11	564	63	99.0604
Spot119.FIN2	0.161905	125.2	5.5	166.8	6.7	139.6	6.3	1.33227	11550	5.27	0.15	2.8463	0.3435	0.0097	2.82387	0.60159	0.0893	0.0028	1876	27	1899	46	1853	25	1590	160	101.226
Spot120.FIN2	0.515152	113.8	4.3	111	4.3	25.4	1.4	0.975395	3630	1.089	0.037	3.39761	0.12	0.0027	2.25	0.14304	0.0247	0.0011	892	41	728	15	742	18	200	220	81.6143
Spot121.FIN2	0.107163	548	19	295.5	9.6	93.4	4	0.539234	17450	1.059	0.023	2.17186	0.1206	0.0025	2.07297	0.44917	0.03417	0.00089	764	26	734	14	733	11	589	76	96.0733
Spot122.FIN2	0.0986807	208.7	6.5	204	10	166	10	0.97748	18950	5.66	0.13	2.29682	0.347	0.0068	1.95965	0.59457	0.0826	0.0028	1915	20	1916	32	1919	20	1280	200	100.052
Spot123.FIN2	0.697761	72.4	4	103	4.7	29.3	2.1	1.42265	2680	1.51	0.066	4.37086	0.1371	0.0039	2.84464	0.11288	0.0279	0.0014	1384	50	825	22	937	27	-100	290	59.6098
Spot124.FIN2	0.0525281	415	19	259.5	8.3	193.3	7.5	0.625301	35600	5.029	0.093	1.84927	0.3222	0.0059	1.83116	0.60617	0.078	0.0018	1831	18	1796	28	1819	16	1406	86	98.0885
Spot126.FIN2	0.120257	146.7	8.6	391	21	214	13	2.6653	15550	6.52	0.17	2.60736	0.422	0.01	2.36967	0.54898	0.0591	0.0016	1878	22	2265	46	2046	22	952	82	120.607
Spot127.FIN2	0.0771134	281	15	408	18	209	11	1.45196	24250	5.32	0.11	2.06767	0.3355	0.007	2.08644	0.59915	0.0552	0.0014	1890	19	1858	34	1871	18	991	79	98.3069
Spot128.FIN2	0.096144	229.1	9.4	110.5	4.1	85.2	3.8	0.482322	19450	5.53	0.11	1.98915	0.3387	0.0066	1.94863	0.49182	0.0828	0.0026	1916	20	1879	32	1906	17	1290	220	98.0689
Spot129.FIN2	0.178862	160	4.6	277.3	7.4	143.7	5.7	1.73313	10455	4.27	0.13	3.0445	0.2632	0.0074	2.81155	0.51473	0.0551	0.0018	1839	28	1504	38	1676	24	940	110	81.7836
Spot130.FIN2	0.418813	151.6	5.3	118.3	3.8	35.9	1.8	0.780343	4465	1.082	0.038	3.51201	0.1152	0.0027	2.34375	0.21594	0.0306	0.0012	920	41	702	16	739	18	140	220	76.3043
Spot131.FIN2	0.124501	173.7	5.5	164.9	4.5	105.7	3.6	0.949338	15020	5.89	0.11	1.86757	0.3534	0.0064	1.81098	0.56394	0.0696	0.0019	1941	18	1951	31	1951	16	1010	140	100.515
Spot132.FIN2	0.298961	130.3	3.3	240.3	5.8	65.2	2.9	1.84421	6255	3.47	0.11	3.17003	0.1953	0.0053	2.71377	0.44039	0.0289	0.0012	1977	34	1147	28	1522	23	390	110	58.0172
Spot133.FIN2	0.0790698	808	24	429	10	127.4	4.2	0.530941	23650	1.055	0.02	1.89573	0.1194	0.0022	1.84255	0.53915	0.03157	0.00074	718	22	726	13	729.5	9.9	547	57	101.114
Spot134.FIN2	0.0355176	603	24	316	12	263	12	0.524046	52650	5.488	0.089	1.62172	0.3441	0.006	1.74368	0.56097	0.0874	0.0019	1859	16	1901	28	1894	14	1576	84	102.259
Spot136.FIN2	0.0851742	766	14	427.6	7.2	131.5	4	0.558225	21955	1.038	0.024	2.31214	0.1176	0.0028	2.38095	0.3733	0.03278	0.00096	740	28	716	16	722	12	666	62	96.7568
Spot138.FIN2	0.0475222	495	30	610	40	562	39	1.23232	39350	5.31	0.1	1.88324	0.3322	0.0067	2.01686	0.58696	0.0912	0.0022	1870	19	1850	32	1867	17	1740	97	98.9305
Spot139.FIN2	0.442604	141.5	5	85.1	2.5	27.9	1.4	0.601413	4225	1.048	0.039	3.72137	0.1218	0.0033	2.70936	0.32124	0.0348	0.0016	848	42	739	19	717	19	-260	360	87.1462
Spot140.FIN2	0.235072	277	9.1	177.8	4.8	58.9	2.6	0.641877	7955	1.147	0.034	2.96425	0.1216	0.0028	2.30263	0.39706	0.0339	0.0012	905	35	739	16	769	16	400	130	81.6575
Spot141.FIN2	0.141239	485	16	298.2	4.6	89.5	2.8	0.614845	13240	1.072	0.026	2.42537	0.1117	0.0024	2.14861	0.41178	0.03154	0.00091	894	30	681	14	738	13	494	77	76.1745
Spot142.FIN2	0.147013	423	10	328	11	95	3.8	0.775414	12720	1.319	0.034	2.57771	0.1231	0.0031	2.51828	0.5012	0.03038	0.00099	1074	35	747	18	850	15	462	84	69.5531
Spot143.FIN2	0.122623	567	20	895	30	212.5	9.3	1.57848	15250	1.163	0.027	2.32158	0.1085	0.0024	2.21198	0.42996	0.02433	0.00058	1077	30	663	14	783	13	405	32	61.5599
Spot145.FIN2	0.0912195	677	26	347	13	115.2	5.1	0.512555	20500	1.131	0.024	2.12202	0.1261	0.0026	2.06186	0.47276	0.03459	0.00088	738	25	766	15	764	11	627	79	103.794
Spot146.FIN2	0.37816	159.6	7	101.8	3.3	35.4	1.8	0.637845	4945	1.069	0.036	3.36763	0.1227	0.0031	2.52649	0.29575	0.0365	0.0015	836	38	743	18	733	17	530	220	88.8756
Spot148.FIN2	0.121036	539	30	322	16	109	6	0.597403	15450	1.027	0.024	2.3369	0.1153	0.0024	2.08153	0.39682	0.034	0.001	740	28	702	14	712	12	510	120	94.8649
Spot149.FIN2	0.871795	60	2.3	76.1	2.6	19.9	1.1	1.26833	2145	1.241	0.055	4.43191	0.1457	0.0046	3.15717	0.1719	0.0293	0.0019	1025	52	873	25	812	25	-630	440	85.1707
Spot150.FIN2	0.240051	237	10	225	10	52.1	3.1	0.949367	7790	1.163	0.041	3.52537	0.1286	0.0035	2.72162	0.39612	0.0245	0.0011	760	39	779	20	787	19	120	160	102.5
Spot151.FIN2	0.25	255.7	8.7	218.8	5	65.2	2.3	0.85569	7480	1.077	0.029	2.69266	0.1177	0.0027	2.29397	0.23847	0.03114	0.00097	849	35	716	16	738	14	420	110	84.3345
Spot152.FIN2	0.331854	196.4	7.6	153.2	5	47.2	2.1	0.780041	5635	1.036	0.034	3.28185	0.117	0.0029	2.47863	0.30687	0.0309	0.0011	853	38	712	17	708	16	350	160	83.4701
Spot153.FIN2	0.0605178	359	13	327	8.5	281	10	0.910864	30900	5.28	0.1	1.89394	0.3379	0.0072	2.13081	0.52334	0.0876	0.0022	1853	19	1875	35	1861	16	1588	82	101.187
Spot154.FIN2	0.0437939	513	22	308	16	259	15	0.60039	42700	5.262	0.094	1.78639	0.3317	0.0062	1.86916	0.61009	0.0814	0.0022	1835	18	1847	30	1865	15	1290	100	100.654
Spot155.FIN2	0.0867749	316	14	195.4	8.1	132.1	6.6	0.618354	21550	4.33	0.11	2.54042	0.2666	0.0079	2.96324	0.57494	0.0695	0.0025	1915	24	1527	40	1691	22	1100	160	79.7389
Spot156.FIN2	0.0318298	698	23	626	12	526	14	0.896848	58750	5.338	0.088	1.64856	0.3373	0.0059	1.74918	0.56196	0.0863	0.0017	1823	17	1874	28	1870	14	1611	45	102.798
Spot158.FIN2	6.40454	456	15	365	12	118.1	4.2	0.800439	291.98	1.449	0.039	2.69151	0.1284	0.0029	2.25857	0.46893	0.034	0.001	1140	28	778	16	910	16	304	88	68.2456
Spot159.FIN2	0.055	388	6.2	387.6	9.2	263.4	6.4	0.998969	34000	5.7	0.13	2.2807	0.3432	0.0081	2.36014	0.68194	0.0694	0.0021	1869	21	1901	38	1926	19	1134	76	101.712
Spot160.FIN2	0.188129	125.6	4.2	127.9	3.2	111.3	4	1.01831	9940	5.11	0.11	2.15264	0.3085	0.0067	2.1718	0.49385	0.09	0.0029	1924	26	1730	33	1837	19	1190	170	89.9168
Spot162.FIN2	0.0886256	692	18	265.2	9.6	89.1	4.4	0.383237	21100	1.078	0.022	2.04082	0.1186	0.0023	1.93929	0.49457	0.0344	0.001	764	25	721	13	738	11	542	92	94.3717
Spot164.FIN2	0.126053	206.6	6	333.7	9.9	238.8	8	1.6152	14835	5.15	0.16	3.1068	0.2818	0.0078	2.76792	0.59976	0.0735	0.002	2032	28	1594	39	1838	26	1190	91	78.4449
Spot168.FIN2	0.107781	169.6	8.9	236.5	9.5	146.2	7.8	1.39446	17350	6.3	0.18	2.85714	0.408	0.01	2.45098	0.53438	0.0617	0.0019	1843	25	2207	47	2009	24	1010	120	119.75
Spot169.FIN2	0.0823789	284.9	8.6	370.4	7.1	296.1	7.7	1.30011	22700	5.11	0.11	2.15264	0.3171	0.0066	2.08136	0.55693	0.0819	0.0019	1877	19	1765	32	1829	18	1414	68	94.033
Spot170.FIN2	0.122502	170.8	4.9	200.1	4.3	194.2	5.8	1.17155	15265	5.72	0.12	2.0979	0.3536	0.0076	2.14932	0.54505	0.1008	0.0028	1877	20	1944	36	1926	18	1580	120	103.57
Spot171.FIN2	0.238825	69.7	3.5	96.5	4.2	62.8	3.3	1.38451	7830	7.67	0.2	2.60756	0.4415	0.0097	2.19706	0.48155	0.0679	0.0023	2018	24	2343	43	2184	23	1210	220	116.105
Spot172.FIN2	0.70566	85.5	4.6	82.4	3.4	27.2	1.6	0.963743	2650	1.619	0.091	5.62075	0.12	0.0035	2.91667	0.17732	0.0338	0.0016	1362	71	729	20	917	32	-80	360	53.5242
Spot174.FIN2	0.0914425	659	25	610	17	200	10	0.925645	20450	1.117	0.036	3.22292	0.1241	0.0042	3.38437	0.52969	0.0341	0.0016	858	35	751	24	755	17	620	62	87.5291
Spot175.FIN2	0.0763265	289	15	414	10	376	12	1.43253	24500	5.35	0.11	2.05607	0.3327	0.0069	2.07394	0.55962	0.0906	0.0018	1870	20	1852	33	1876	17	1659	57	99.0374
Spot176.FIN2	0.13997	440	10	276.8	5.6	93.1	2.8	0.629091	13360	1.106	0.027	2.44123	0.1206	0.0027	2.23881	0.41249	0.03365	0.00098	808	27	731	16	754	13	459	81	90.4703
Spot177.FIN2	0.101355	590	21	367.3	7.9	125.4	3.9	0.622542	18450	1.136	0.028	2.46479	0.124	0.0027	2.17742	0.51985	0.03519	0.00097	748	27	752	15	765	13	657	63	100.535
Spot179.FIN2	0.907767	87.8	2.5	141.2	5	22.5	1.5	1.6082	2060	1.013	0.058	5.72557	0.0938	0.0038	4.05117	0.22696	0.0162	0.001	1268	79	577	22	700	30	20	240	45.5047
Spot180.FIN2	0.0877934	258	14	197	11	157	11	0.763566	21300	5.33	0.11	2.06379	0.3317	0.0067	2.0199	0.56881	0.0787	0.0021	1868	18	1844	32	1870	17	1150	140	98.7152
Spot182.FIN2	0.468672	125.5	3.8	118.5	3.4	44	1.9	0.944223	3990	1.299	0.045	3.4642	0.1271	0.0037	2.91109	0.30982	0.038	0.0015	1086	41	769	21	834	20	350	200	70.8103
Spot183.FIN2	0.145866	418	12	263.2	5.9	78.8	2.8	0.629665	12820	1.13	0.031	2.74336	0.1225	0.0028	2.28571	0.3779	0.0311	0.0011	748	33	745	16	765	15	530	110	99.5989
Spot185.FIN2	0.116511	200.1	7.8	157.7	4.4	132.7	5.4	0.788106	16050	5.23	0.1	1.91205	0.3253	0.0071	2.1826	0.51601	0.0854	0.0024	1866	21	1818	34	1854	17	1480	140	97.4277
Spot187.FIN2	0.113333	213.9	6.9	279.2	8.2	199.1	6.4	1.30528	16500	5.31	0.11	2.07156	0.321	0.0067	2.08723	0.50356	0.0754	0.0017	1909	22	1792	32	1865	18	1434	85	93.8711
Spot188.FIN2	0.124958	185.1	6	260.1	6.4	219.1	6.8	1.40519	14965	5.41	0.12	2.21811	0.3337	0.0076	2.27749	0.62651	0.0874	0.002	1901	19	1850	36	1883	19	1747	81	97.3172
Spot190.FIN2	0.0963918	258	11	198.5	8.1	161.9	6.9	0.76938	19400	5.49	0.12	2.18579	0.3179	0.0067	2.10758	0.59055	0.0871	0.0023	1960	22	1781	33	1895	19	1240	150	90.8673
Spot191.FIN2	0.133096	493	20	315.4	8.6	103.5	3.9	0.639757	14050	1.101	0.026	2.36149	0.1203	0.0025	2.07814	0.44929	0.0345	0.00092	758	27	730	14	750	12	502	88	96.3061
Spot192.FIN2	0.136496	166.8	9.2	238	12	152.5	8.7	1.42686	13700	5.66	0.13	2.29682	0.349	0.0075	2.149	0.56264	0.0672	0.0018	1866	20	1923	35	1915	19	1230	120	103.055
Spot193.FIN2	0.107163	620	21	399.2	8.8	115.7	3.8	0.643871	17450	1.016	0.022	2.16535	0.118	0.0022	1.86441	0.43249	0.03041	0.00078	667	25	719	13	711	11	529	62	107.796
Spot194.FIN2	0.107471	631	23	378.4	9.7	121.7	4.4	0.599683	17400	1.061	0.025	2.35627	0.1184	0.0027	2.28041	0.48723	0.03393	0.00096	760	28	719	15	734	12	495	67	94.6053
Spot195.FIN2	0.337545	197.3	9.1	182.8	6.5	62.5	3.2	0.926508	5540	1.059	0.039	3.68272	0.1193	0.0036	3.0176	0.29833	0.0351	0.0013	877	42	728	20	729	19	450	160	83.0103
Spot196.FIN2	0.12018	455	12	1110	31	250.1	8.4	2.43956	15560	1.323	0.036	2.72109	0.1451	0.0032	2.20538	0.391	0.02369	0.00056	784	32	872	18	852	16	449	29	111.224
Spot197.FIN2	0.156224	421	15	265.1	8.4	78.8	3.5	0.629691	11970	1.152	0.032	2.77778	0.1219	0.0028	2.29696	0.44803	0.0311	0.0011	778	32	739	16	779	15	350	120	94.9871
Spot198.FIN2	19.6372	243	6.2	348.2	8.7	72.7	2.7	1.43292	95.2273	1.682	0.055	3.26992	0.1126	0.0028	2.48668	0.36282	0.02218	0.00087	1800	38	686	16	996	21	-150	110	38.1111
Spot199.FIN2	0.329806	206.5	4.6	212.6	6.4	57.3	2.4	1.02954	5670	1.108	0.043	3.88087	0.1194	0.0034	2.84757	0.3267	0.0287	0.0012	860	41	726	20	752	20	360	160	84.4186
Spot200.FIN2	0.102186	209	6.9	378	13	198.6	6.4	1.80861	18300	6.31	0.13	2.06022	0.3937	0.0072	1.8288	0.55368	0.057	0.0012	1875	19	2139	33	2011	17	1006	65	114.08
Spot202.FIN2	0.139033	452	15	492	16	108.1	4.2	1.0885	13450	1.345	0.038	2.82528	0.1304	0.0029	2.22393	0.37053	0.0237	0.00071	1086	34	788	16	864	16	293	67	72.5599
Spot203.FIN2	0.901205	55.8	2.3	82.6	3.5	20.7	1.3	1.48029	2075	1.684	0.078	4.63183	0.1588	0.0051	3.21159	0.14189	0.026	0.0015	1258	61	943	28	982	29	-630	420	74.9603
Spot205.FIN2	0.113162	581	16	514	14	126	4.8	0.884682	16525	1.197	0.03	2.50627	0.125	0.0025	2	0.47479	0.02597	0.0007	869	28	758	14	797	14	361	60	87.2267
Spot206.FIN2	0.112991	610	27	362	14	112	5.8	0.593443	16550	1.089	0.027	2.47934	0.1195	0.0028	2.3431	0.40602	0.0322	0.0011	829	30	727	16	744	13	488	98	87.696
Spot207.FIN2	0.35619	184.3	5.6	322	8.7	64.6	2.3	1.74715	5250	1.144	0.04	3.4965	0.1267	0.0029	2.28887	0.31542	0.02147	0.0007	836	41	767	17	773	19	240	100	91.7464
Spot209.FIN2	0.372881	187.9	4.4	155.3	2.4	48.4	1.6	0.826503	5015	1.056	0.036	3.40909	0.1204	0.0033	2.74086	0.31611	0.0331	0.0012	812	39	730	19	722	17	300	180	89.9015
Spot210.FIN2	0.120257	199.2	9.6	166.8	7.5	142.4	7.5	0.837349	15550	5.52	0.13	2.35507	0.3418	0.0079	2.31129	0.53016	0.0921	0.0027	1892	23	1885	37	1897	20	1440	170	99.63
Spot211.FIN2	0.658451	101.2	4.2	63.4	2.2	20.8	1.3	0.626482	2840	1.067	0.047	4.40487	0.121	0.0038	3.1405	0.30608	0.0346	0.002	943	49	731	22	719	23	-580	480	77.5186
Spot212.FIN2	0.108155	671	18	215.3	6.3	70.3	3.4	0.320864	17290	0.976	0.03	3.07377	0.1134	0.0032	2.82187	0.4684	0.0338	0.0014	733	35	690	18	687	15	550	140	94.1337
Spot214.FIN2	0.0649306	393	15	249.5	8.4	201.1	8.4	0.63486	28800	5.26	0.1	1.90114	0.3261	0.0062	1.90126	0.54674	0.0848	0.0021	1860	17	1818	30	1862	17	1600	110	97.7419
Spot215.FIN2	0.144737	257.1	8.7	101.6	4.5	56.3	3.4	0.395177	12920	2.977	0.083	2.78804	0.2153	0.0061	2.83326	0.61493	0.059	0.0031	1540	28	1255	32	1395	21	590	320	81.4935
Spot216.FIN2	0.119872	595	23	325.4	9.1	101.3	3.9	0.546891	15600	1.042	0.024	2.30326	0.117	0.0023	1.96581	0.43773	0.03244	0.00093	756	26	714	13	723	12	496	82	94.4444
Spot218.FIN2	0.420225	154.6	7.9	62.7	2.7	23	1.5	0.405563	4450	1.056	0.037	3.50379	0.1199	0.0033	2.75229	0.32713	0.0352	0.0019	833	37	730	19	729	18	180	460	87.6351
Spot219.FIN2	0.145639	197.1	6.8	201.1	5.8	150.7	5.2	1.02029	12840	3.567	0.082	2.29885	0.2828	0.0064	2.26308	0.50471	0.0775	0.0021	1449	24	1604	32	1540	19	1420	110	110.697
Spot220.FIN2	0.227632	103.2	5.4	121.5	5.3	114.2	6.2	1.17733	8215	5.47	0.15	2.74223	0.3445	0.0093	2.69956	0.52049	0.094	0.0031	1907	28	1893	44	1884	24	1610	190	99.2659
Spot221.FIN2	0.1375	165.5	7.1	139	5.1	127.8	5.8	0.839879	13600	5.55	0.12	2.16216	0.3554	0.0077	2.16657	0.49391	0.094	0.0028	1866	21	1958	36	1908	19	1470	200	104.93
Spot223.FIN2	0.188034	128.3	5.7	116.7	4.2	104.8	5.2	0.909587	9945	5.37	0.13	2.42086	0.3448	0.0083	2.40719	0.58033	0.0901	0.003	1843	22	1900	39	1867	21	1490	220	103.093
Spot224.FIN2	0.439483	139.8	4.7	110.6	4	41.1	2.5	0.79113	4255	1.181	0.049	4.14903	0.1315	0.005	3.80228	0.36206	0.0386	0.0021	943	50	794	28	787	22	700	260	84.1994
Spot225.FIN2	0.225845	104.1	4	111.6	3.8	102.1	4.4	1.07205	8280	5.69	0.15	2.6362	0.3541	0.0095	2.68286	0.55747	0.0931	0.0029	1906	28	1934	45	1917	22	1630	220	101.469
Spot226.FIN2	0.249833	96.5	4.1	82.9	3.1	78.7	3.8	0.859067	7485	5.45	0.14	2.56881	0.3439	0.0089	2.58796	0.39941	0.0928	0.0035	1879	29	1889	42	1880	22	1500	290	100.532
Spot228.FIN2	0.463445	138.3	6.8	142.3	6.3	51.6	3.1	1.02892	4035	1.173	0.047	4.00682	0.1299	0.0042	3.23326	0.34408	0.0363	0.0016	978	48	789	24	785	22	1030	180	80.6748
Spot229.FIN2	0.553254	123.4	7.8	87.5	4.3	32.3	2.3	0.709076	3380	1.116	0.043	3.85305	0.1152	0.0035	3.03819	0.27377	0.033	0.0016	1024	46	702	20	751	21	60	340	68.5547
Spot231.FIN2	0.122623	184.6	7.6	209	7.2	202	8.7	1.13218	15250	5.75	0.16	2.78261	0.372	0.01	2.68817	0.60238	0.0975	0.0028	1880	27	2023	48	1941	24	1780	130	107.606
Spot233.FIN2	0.503365	122.9	6.4	70.4	2.9	26.2	1.7	0.572823	3715	1.085	0.042	3.87097	0.1248	0.0036	2.88462	0.29912	0.036	0.0019	869	44	756	20	735	21	260	400	86.9965
Spot234.FIN2	0.160171	393	15	218.2	6.5	78.4	2.9	0.555216	11675	1.177	0.029	2.46389	0.1357	0.0031	2.28445	0.40591	0.0367	0.0011	725	29	821	17	787	13	750	100	113.241
Spot235.FIN2	0.153279	149.1	7.2	222.9	8.2	229	12	1.49497	12200	5.63	0.14	2.48668	0.3452	0.0092	2.66512	0.53357	0.0949	0.0027	1909	27	1899	44	1907	21	1870	110	99.4762
Spot236.FIN2	0.261173	248	14	142.9	5.6	59	3.8	0.57621	7160	1.128	0.035	3.10284	0.1224	0.0035	2.85948	0.45377	0.037	0.0015	866	36	742	20	763	16	710	160	85.6813
Spot237.FIN2	0.201509	335	14	220.3	7.7	77.5	3.5	0.657612	9280	1.179	0.037	3.13825	0.1286	0.0033	2.5661	0.3566	0.0354	0.0013	884	34	777	19	782	17	740	110	87.8959
Spot238.FIN2	0.232877	295	12	173.6	5.6	60.4	2.9	0.588475	8030	1.094	0.031	2.83364	0.1253	0.0032	2.55387	0.34664	0.0341	0.0012	797	33	760	18	742	15	580	160	95.3576
Spot239.FIN2	0.168317	141.1	2.5	211	4	207.7	4.4	1.49539	11110	5.79	0.13	2.24525	0.3568	0.0088	2.46637	0.52358	0.0961	0.0025	1908	23	1960	42	1937	20	1840	110	102.725
Spot240.FIN2	0.117981	205.7	9.1	240	10	247	13	1.16675	15850	5.45	0.14	2.56881	0.3423	0.0087	2.54163	0.50793	0.1008	0.0029	1881	24	1893	41	1883	22	1970	110	100.638
Spot241.FIN2	0.143846	159.7	6.8	129.3	4.7	128.9	5.7	0.809643	13000	6.32	0.14	2.21519	0.3681	0.0084	2.28199	0.56346	0.0951	0.0028	1995	22	2016	39	2011	20	1680	190	101.053
Spot242.FIN2	0.0809524	295	10	190.5	5	214	6.6	0.645763	23100	5.56	0.12	2.15827	0.3492	0.0079	2.26231	0.54573	0.1119	0.0033	1877	22	1922	38	1909	19	2030	120	102.397
Spot243.FIN2	0.398721	176.7	7.9	115.4	4.3	44.5	2.2	0.653084	4690	1.135	0.04	3.52423	0.1261	0.0037	2.93418	0.32478	0.0378	0.0015	957	40	762	21	760	19	530	270	79.6238
Spot246.FIN2	0.191795	405	16	672	18	220	11	1.65926	9750	1.313	0.039	2.9703	0.1054	0.0028	2.65655	0.25635	0.03075	0.00092	1373	43	644	16	840	17	560	41	46.9046
Spot247.FIN2	0.155058	445	15	248.6	6.3	90.1	3.6	0.558652	12060	1.195	0.032	2.67782	0.1244	0.0029	2.33119	0.4713	0.0364	0.0012	909	32	755	16	793	15	737	99	83.0583
Spot248.FIN2	0.230012	114.3	3.9	105.3	2.8	100.5	3.9	0.92126	8130	5.37	0.13	2.42086	0.3371	0.0083	2.46218	0.49726	0.0951	0.003	1892	25	1860	40	1876	21	1840	190	98.3087
Spot249.FIN2	0.105949	243	13	192.1	6.1	186.9	7.7	0.790535	17650	5.39	0.13	2.41187	0.3361	0.009	2.67777	0.53595	0.0977	0.0028	1907	25	1860	42	1873	21	1870	130	97.5354
Spot250.FIN2	0.205156	194.2	6.7	257.3	9.1	175.9	5.8	1.32492	9115	2.664	0.079	2.96547	0.2247	0.0061	2.71473	0.45494	0.0688	0.0019	1348	32	1301	31	1309	22	1231	94	96.5134
Spot251.FIN2	0.338156	74.3	2.6	109.1	3.2	96.7	3.7	1.46837	5530	5.33	0.16	3.00188	0.34	0.0093	2.73529	0.47215	0.0884	0.0028	1897	29	1871	44	1858	24	1550	200	98.6294
Spot252.FIN2	0.152033	474	25	284	12	101.1	5.4	0.599156	12300	1.113	0.029	2.60557	0.1221	0.0027	2.2113	0.46734	0.0347	0.0011	808	31	741	16	756	14	771	94	91.7079
Spot253.FIN2	0.261538	261	12	174.9	6.6	63.7	3.3	0.670115	7150	1.194	0.034	2.84757	0.1253	0.0032	2.55387	0.3284	0.0362	0.0013	975	36	757	18	791	16	680	150	77.641
Spot254.FIN2	0.192288	360	16	202.5	7.6	71.2	3.4	0.5625	9725	1.083	0.031	2.86242	0.1276	0.0029	2.27273	0.37826	0.0348	0.0012	710	31	773	17	744	15	790	130	108.873
Spot255.FIN2	0.45006	161.6	4.9	144.2	3.6	47.5	2	0.892327	4155	1.058	0.039	3.6862	0.1218	0.0034	2.79146	0.37157	0.033	0.0013	870	42	737	20	733	19	860	160	84.7126
Spot256.FIN2	0.165633	143.7	6	91.8	2.6	90.5	3.7	0.638831	11290	5.98	0.14	2.34114	0.355	0.0082	2.30986	0.45932	0.0999	0.0035	2000	24	1951	39	1971	20	2020	230	97.55
Spot257.FIN2	0.1375	492	21	312.9	9.8	114.5	6.1	0.635976	13600	1.122	0.028	2.49554	0.1204	0.0028	2.32558	0.4315	0.0354	0.0012	853	30	732	16	758	13	744	75	85.8148
Spot261.FIN2	0.104762	325.7	8.9	114.6	3.5	81.4	3.5	0.351858	17850	4.34	0.1	2.30415	0.2476	0.007	2.82714	0.58482	0.0725	0.0031	1979	24	1422	36	1704	19	980	240	71.8545
Spot262.FIN2	0.166001	406	16	202	5.2	75.3	3.1	0.497537	11265	1.192	0.031	2.60067	0.1302	0.0032	2.45776	0.42159	0.0368	0.0012	795	29	788	18	792	14	750	130	99.1195
Spot263.FIN2	0.34	195.2	8.6	153.4	5.5	60	3.1	0.785861	5500	1.172	0.039	3.32765	0.1274	0.0037	2.90424	0.32079	0.0387	0.0015	930	40	771	21	776	18	790	170	82.9032
Spot264.FIN2	0.176415	385	21	222.4	8.3	79.6	4.2	0.577662	10600	1.098	0.03	2.73224	0.1251	0.0034	2.71783	0.40428	0.0363	0.0013	762	33	756	19	747	15	650	120	99.2126
Spot266.FIN2	0.742063	94	4.6	81.7	3.3	26.5	1.8	0.869149	2520	1.088	0.053	4.87132	0.121	0.0043	3.55372	0.25005	0.0329	0.0018	1010	56	732	25	742	26	250	400	72.4752
Spot267.FIN2	0.106553	225	10	229.6	9.5	238	13	1.02044	17550	5.86	0.15	2.55973	0.355	0.01	2.8169	0.4835	0.1038	0.0032	1930	25	1932	48	1943	23	2110	110	100.104
Spot268.FIN2	0.164035	415	19	259.3	8.6	96.6	4.6	0.624819	11400	1.166	0.031	2.65866	0.126	0.0034	2.69841	0.41011	0.0377	0.0013	826	34	763	19	782	15	914	92	92.3729
Spot271.FIN2	0.28015	242	12	165.1	5.3	57.5	3.1	0.682231	6675	1.187	0.037	3.1171	0.1189	0.0034	2.85955	0.30859	0.0336	0.0014	1041	42	725	19	784	17	920	140	69.6446
Spot273.FIN2	0.478261	136	2.8	125.1	3.1	45.8	1.9	0.919853	3910	1.196	0.043	3.59532	0.1283	0.0039	3.03975	0.32116	0.0392	0.0019	949	45	775	22	791	20	900	190	81.6649
Spot276.FIN2	0.0532764	442	25	317	15	325	20	0.717195	35100	5.46	0.15	2.74725	0.344	0.011	3.19767	0.59011	0.098	0.0034	1903	26	1889	52	1884	23	1908	90	99.2643
Spot277.FIN2	0.272198	219	14	193	11	56.1	4.4	0.881279	6870	1.229	0.044	3.58015	0.1382	0.0046	3.32851	0.32465	0.0284	0.0014	851	45	834	26	804	20	520	220	98.0024
Spot278.FIN2	0.0797441	270.2	6.2	374.1	8.3	393	13	1.38453	23450	7.02	0.16	2.2792	0.392	0.01	2.55102	0.62551	0.1041	0.003	2018	22	2119	48	2108	20	1970	80	105.005
Spot279.FIN2	0.234336	248.2	9	230.9	6	71.9	3.4	0.930298	7980	1.311	0.04	3.05111	0.1398	0.0039	2.7897	0.46193	0.0324	0.0013	894	33	842	22	849	18	640	110	94.1834
Spot280.FIN2	0.0780793	309	12	252	6.3	238	9.7	0.815534	23950	5.73	0.12	2.09424	0.3451	0.0084	2.43408	0.59362	0.0941	0.0031	1901	22	1910	40	1928	19	1911	98	100.473
Spot281.FIN2	0.259362	260.3	9.9	159.4	5.8	57.4	2.6	0.61237	7210	1.211	0.035	2.89017	0.1266	0.0032	2.52765	0.3854	0.036	0.0013	950	36	767	18	798	16	630	170	80.7368
Spot282.FIN2	0.359962	188.5	8	91.4	3	39.2	2.1	0.484881	5195	1.156	0.042	3.63322	0.1242	0.0042	3.38164	0.37329	0.0435	0.002	962	47	749	24	766	19	1040	260	77.8586
Spot283.FIN2	0.207662	104.2	1.8	160.4	3.2	113.1	2.7	1.53935	9005	6.46	0.14	2.16718	0.3911	0.0088	2.25006	0.47422	0.0728	0.002	1926	23	2120	40	2032	19	1360	140	110.073
Spot285.FIN2	0.109038	211.7	8.5	171.2	5.3	188.4	6.9	0.808692	17150	6.48	0.17	2.62346	0.377	0.011	2.91777	0.6632	0.1129	0.0032	2004	25	2044	50	2033	23	2150	140	101.996
Spot286.FIN2	0.195709	127.9	3.5	100.6	2.3	97.8	3.1	0.786552	9555	5.62	0.15	2.66904	0.335	0.0093	2.77612	0.5369	0.1016	0.0036	1956	27	1861	45	1912	23	1970	220	95.1431
Spot287.FIN2	0.159829	431	23	232.9	8.2	91.6	4.9	0.540371	11700	1.119	0.033	2.94906	0.1225	0.0037	3.02041	0.46323	0.0379	0.0013	881	33	740	21	763	16	800	110	83.9955
Spot288.FIN2	0.352166	188	11	90.5	4.5	40	2.6	0.481383	5310	1.321	0.052	3.93641	0.124	0.004	3.22581	0.34459	0.0421	0.0021	1178	50	749	23	832	22	700	350	63.5823
Spot289.FIN2	0.189944	191.6	6.4	243.2	6.7	126.8	5	1.26931	9845	4.06	0.13	3.20197	0.235	0.0079	3.3617	0.54727	0.0527	0.0021	1955	33	1355	41	1647	27	1060	120	69.3095
Spot290.FIN2	0.0989418	247.9	9.1	251.7	5.7	239	10	1.01533	18900	5.49	0.14	2.55009	0.335	0.0093	2.77612	0.59432	0.0946	0.0031	1953	25	1842	45	1886	21	1937	95	94.3164
Spot291.FIN2	0.311407	238	11	174.3	7.2	42.5	2.7	0.732353	6005	1.052	0.039	3.70722	0.108	0.0035	3.24074	0.37367	0.0248	0.0013	843	42	658	20	726	19	570	190	78.0546
Spot292.FIN2	0.174278	142.8	5.8	158.9	4.9	141.1	5.4	1.11275	10730	5.7	0.14	2.45614	0.3466	0.0089	2.5678	0.62254	0.0914	0.0026	1922	23	1902	42	1919	21	1760	160	98.9594
Spot293.FIN2	0.111976	302.7	9.8	171.7	5.2	74.3	3.3	0.567228	16700	4.64	0.12	2.58621	0.2502	0.0067	2.67786	0.55926	0.0445	0.0021	2100	24	1435	34	1748	22	590	170	68.3333
Spot294.FIN2	0.678766	102.1	5.6	80	3.9	30	2	0.783546	2755	1.115	0.052	4.66368	0.1237	0.0045	3.63783	0.32982	0.0369	0.0019	990	52	747	25	746	24	280	410	75.4545
Spot295.FIN2	0.223818	112.8	3.8	233.9	6.1	218	7.3	2.07358	8355	5.46	0.15	2.74725	0.3343	0.0093	2.78193	0.54836	0.0936	0.0026	1911	27	1858	45	1886	23	1770	110	97.2266
Spot296.FIN2	0.143846	177.1	7.9	149	5.2	151.4	7.5	0.841333	13000	5.77	0.14	2.42634	0.3357	0.0087	2.5916	0.56195	0.0991	0.0033	1964	25	1859	42	1947	21	1750	160	94.6538
1 data not corrected for common-Pb
2 Concordance calculated as (206Pb-238U age/207Pb-206Pb age)*100
f206c = the proportion of the 206Pb ion beam that is common, calculated as (206Pb204Pbmodel/206Pb204Pb measured)* 100
where 206Pb204Pb measured = (Stacey and Kramers, 1975) 206Pb/204Pb ratio at the apparent (non-common Pb corrected) 207Pb/206Pb age
	Grains excluded from the analysis due Pb loss

## Sheet: MAR17-2(6)
Spot	f206	U		Th		Pb		Th/U		Isotopic Ratios1									Ages (Ma)1								% conc2
	(%)	(mg.g-1)	2σ	(mg.g-1)	2σ	(mg.g-1)	2σ	calculated	206Pb/204Pb	207Pb/235U	1σ	1σ %	206Pb/238U	1σ	1σ %	Rho	208Pb/232Th	1σ	207Pb/206Pb	2σ	206Pb/238U	2σ	207Pb/235U	2σ	208Pb/232Th	2σ
Spot57.FIN2	0.112077	73.6	2.2	63.2	2.7	52.6	2.2	0.858696	16685	5.39	0.089	1.65121	0.3404	0.005	1.46886	0.4555	0.0914	0.0021	1885	15	1885	24	1880	14	1590	180	100
Spot58.FIN2	0.0917566	92.8	2.3	128.6	3.8	101.5	3	1.38578	20380	5.057	0.07	1.38422	0.3333	0.0043	1.29013	0.48678	0.0858	0.0015	1816	15	1853	21	1828	12	1596	77	102.037
Spot59.FIN2	0.120257	95.9	3.6	94.9	2.6	42.2	2.2	0.989572	15550	3.584	0.074	2.06473	0.2482	0.0051	2.05479	0.48958	0.0464	0.0018	1705	22	1429	26	1539	16	780	130	83.8123
Spot60.FIN2	0.0962925	98	2	87	1.6	66.7	1.6	0.887755	19420	4.312	0.064	1.48423	0.3055	0.0048	1.57119	0.50067	0.0822	0.0016	1694	17	1715	24	1693	12	1540	100	101.24
Spot62.FIN2	0.0628571	141.5	2.9	180.2	4.1	140	3.3	1.2735	29750	5.222	0.085	1.62773	0.3343	0.0056	1.67514	0.54391	0.0811	0.0017	1881	17	1856	27	1857	14	1560	60	98.6709
Spot65.FIN2	0.0654877	129.7	1.8	200.5	3.6	172.9	3.1	1.54588	28555	5.415	0.084	1.55125	0.3395	0.0047	1.38439	0.46213	0.0913	0.0014	1882	15	1884	22	1879	13	1725	49	100.106
Spot67.FIN2	0.0571865	167.6	6.2	181.4	7	122.4	5	1.08234	32700	4.439	0.073	1.64451	0.3013	0.0048	1.5931	0.58209	0.0726	0.0015	1769	16	1697	24	1716	13	1463	61	95.9299
Spot68.FIN2	0.0639316	128.6	5.5	229.9	8.3	199.4	7.7	1.78771	29250	5.47	0.11	2.01097	0.3543	0.0069	1.9475	0.57853	0.09	0.0017	1857	18	1955	33	1895	17	1735	58	105.277
Spot69.FIN2	0.0459459	184.6	4.2	294.4	6.7	209.5	4.9	1.5948	40700	5.072	0.071	1.39984	0.3299	0.0045	1.36405	0.5866	0.0752	0.0012	1845	12	1835	22	1833	12	1449	42	99.458
Spot70.FIN2	0.0852713	96.5	2.7	177.4	3.4	137.5	2.8	1.83834	21930	5.261	0.073	1.38757	0.3405	0.0046	1.35095	0.539	0.0816	0.0013	1861	13	1891	22	1862	12	1591	54	101.612
Spot72.FIN2	0.0431871	215.2	7.5	365	12	251.1	7.2	1.6961	43300	4.802	0.075	1.56185	0.3087	0.0048	1.55491	0.53653	0.0715	0.0013	1858	16	1738	24	1783	13	1358	41	93.5414
Spot73.FIN2	0.0645941	122.7	3.6	144.5	4.6	112.3	3.3	1.17767	28950	5.458	0.074	1.35581	0.3491	0.0046	1.31767	0.59685	0.0832	0.0015	1861	12	1929	22	1894	12	1527	71	103.654
Spot75.FIN2	0.0494709	298.9	6.5	371.8	5.6	149.9	3	1.24389	37800	2.803	0.056	1.99786	0.1846	0.0031	1.67931	0.49679	0.04388	0.00086	1793	24	1090	17	1356	15	803	38	60.792
Spot76.FIN2	0.066548	126.4	4.4	151.8	5.4	124.4	4.6	1.20095	28100	5.361	0.075	1.39899	0.3438	0.0044	1.27981	0.52799	0.0885	0.0015	1865	13	1905	21	1878	12	1645	75	102.145
Spot77.FIN2	0.134775	65.6	2.4	82.9	2.3	73.8	2.4	1.26372	13875	5.41	0.093	1.71904	0.3511	0.0059	1.68043	0.45805	0.0917	0.0018	1863	19	1936	28	1883	15	1690	110	103.918
Spot78.FIN2	0.0410989	240	11	376	16	301	13	1.56667	45500	5.152	0.064	1.24224	0.3247	0.0045	1.38589	0.58264	0.0834	0.0011	1889	12	1809	22	1842	11	1597	34	95.765
Spot79.FIN2	0.0442604	233	10	237.5	7.7	131.5	5.7	1.01931	42250	4.995	0.073	1.46146	0.3242	0.005	1.54226	0.48697	0.0563	0.0012	1824	18	1807	24	1814	12	1089	53	99.068
Spot80.FIN2	0.0743539	135.7	4.3	170.3	5.7	128.1	4.1	1.25497	25150	5.269	0.072	1.36648	0.3393	0.0046	1.35573	0.5166	0.0802	0.0014	1862	13	1883	22	1861	12	1496	63	101.128
Spot82.FIN2	0.0369931	306	14	228	11	141.5	8.1	0.745098	50550	4.6	0.066	1.43478	0.3042	0.0044	1.44642	0.55955	0.064	0.0012	1812	13	1711	22	1750	12	1157	64	94.426
Spot83.FIN2	0.100268	99.4	4	172.6	9.4	147.7	7.7	1.73642	18650	5.353	0.081	1.51317	0.3463	0.0049	1.41496	0.49929	0.089	0.0015	1857	16	1918	23	1881	13	1708	69	103.285
Spot85.FIN2	0.123841	78.6	3.7	121.1	6.2	98.7	4.3	1.54071	15100	5.66	0.11	1.94346	0.3554	0.0064	1.80079	0.56022	0.0937	0.0024	1936	20	1952	30	1922	17	1750	120	100.826
Spot86.FIN2	0.0441038	233.7	6.4	386.4	9.4	274.3	7.4	1.6534	42400	4.829	0.075	1.55312	0.3171	0.0045	1.41911	0.54962	0.0734	0.001	1819	14	1774	22	1795	13	1410	32	97.5261
Spot87.FIN2	0.0569254	144.3	5	166.9	6.7	124	5	1.15662	32850	5.158	0.066	1.27957	0.3339	0.004	1.19796	0.52104	0.0791	0.0014	1864	13	1856	19	1843	11	1476	66	99.5708
Spot88.FIN2	0.0450602	171	5.1	202.3	3.5	179.8	3	1.18304	41500	5.311	0.075	1.41216	0.3469	0.0054	1.55664	0.63649	0.0968	0.0016	1858	14	1917	26	1873	12	1819	44	103.175
Spot89.FIN2	0.0657293	152.3	4.9	153.6	3.8	76.5	1.6	1.00854	28450	3.651	0.071	1.94467	0.2572	0.0049	1.90513	0.59106	0.0532	0.0014	1733	18	1470	25	1559	15	939	57	84.824
Spot90.FIN2	0.138776	54.8	1.8	67.1	2	59.7	2.1	1.22445	13475	5.291	0.091	1.7199	0.342	0.0058	1.69591	0.43001	0.0972	0.002	1882	19	1890	28	1861	15	1680	120	100.425
Spot91.FIN2	0.0372139	221.1	6.2	243	13	207	12	1.09905	50250	4.731	0.077	1.62756	0.3208	0.0058	1.80798	0.59049	0.0895	0.0017	1787	17	1793	28	1772	14	1726	61	100.336
Spot94.FIN2	0.0241758	368	11	293.9	5.7	224.8	6.7	0.798641	77350	4.458	0.074	1.65994	0.3044	0.0052	1.70828	0.60791	0.0785	0.0015	1759	17	1713	26	1722	14	1473	43	97.3849
Spot95.FIN2	0.119298	72.8	2.4	58.8	1.8	45.9	1.6	0.807692	15675	4.638	0.08	1.72488	0.3151	0.0054	1.71374	0.43539	0.086	0.0019	1781	20	1764	26	1750	14	1410	140	99.0455
Spot96.FIN2	0.106553	89.1	3.1	133.7	2.7	49.5	1.7	1.50056	17550	4.512	0.076	1.6844	0.2886	0.0049	1.69785	0.46734	0.0414	0.0013	1874	19	1629	24	1732	14	701	67	86.9264
Spot97.FIN2	0.140127	59.9	1.7	80.6	1.9	65.1	1.9	1.34558	13345	5.181	0.092	1.77572	0.3366	0.0057	1.6934	0.47615	0.0886	0.0017	1848	19	1871	28	1849	15	1628	92	101.245
Spot98.FIN2	0.0303571	564	17	520	16	143.5	6.4	0.921986	61600	2.545	0.046	1.80747	0.1648	0.0031	1.88107	0.68232	0.02917	0.00062	1829	15	983	17	1284	13	521	21	53.7452
Spot101.FIN2	0.0896023	96.4	1.9	126	2.4	70.8	1.7	1.30705	20870	5.051	0.078	1.54425	0.3167	0.0048	1.51563	0.49945	0.0609	0.0013	1879	15	1776	24	1822	13	1127	60	94.5184
Spot102.FIN2	0.0733333	139.9	3.4	232.6	5.1	160.2	5.2	1.66262	25500	4.262	0.09	2.11168	0.2792	0.0064	2.29226	0.53857	0.0742	0.0018	1836	19	1594	32	1683	17	1409	50	86.8192
Spot103.FIN2	0.0272595	312	12	231.5	7.8	198	6.5	0.741987	68600	5.107	0.07	1.37067	0.3245	0.0049	1.51002	0.63617	0.0938	0.0016	1852	13	1809	24	1834	12	1736	46	97.6782
Spot105.FIN2	0.0380468	247.1	6.3	235	11	132.8	5.8	0.951032	49150	4.534	0.075	1.65417	0.2901	0.0047	1.62013	0.69771	0.0639	0.0021	1833	13	1640	23	1734	14	1196	60	89.4708
Spot107.FIN2	0.0610114	160	6.4	187.8	7.1	163.5	6	1.17375	30650	5.452	0.082	1.50404	0.3394	0.0053	1.56158	0.60375	0.0951	0.0017	1902	14	1881	26	1891	13	1797	56	98.8959
Spot108.FIN2	0.0483829	216	11	257	12	209	10	1.18981	38650	4.869	0.076	1.5609	0.3142	0.0047	1.49586	0.60047	0.0832	0.0013	1830	15	1760	23	1795	13	1573	52	96.1749
Spot109.FIN2	0.065614	182	11	120.9	7.9	96	6.1	0.664286	28500	4.45	0.067	1.50562	0.3035	0.0049	1.6145	0.52837	0.0858	0.0019	1735	16	1709	25	1715	13	1680	130	98.5014
Spot110.FIN2	0.0440518	248	12	211	13	134.5	7.6	0.850806	42450	5.076	0.063	1.24113	0.3282	0.0043	1.31018	0.56693	0.0697	0.0014	1828	12	1829	21	1836	11	1295	71	100.055
Spot111.FIN2	0.0584375	198	8.1	238.8	9.2	164.7	8.5	1.20606	32000	5.019	0.071	1.41462	0.3178	0.0046	1.44745	0.51491	0.068	0.0014	1846	15	1776	22	1822	12	1283	47	96.208
Spot112.FIN2	0.0189751	695	18	394.7	9.1	273.1	7.8	0.567914	98550	4.145	0.064	1.54403	0.2774	0.0045	1.62221	0.6858	0.0697	0.0011	1756	13	1579	22	1661	12	1327	32	89.9203
Spot113.FIN2	0.00882075	816	27	516	15	661	20	0.632353	212000	14.44	0.2	1.38504	0.5227	0.0085	1.62617	0.64794	0.1326	0.0018	2831	12	2707	37	2781	13	2481	36	95.6199
Spot114.FIN2	0.0415556	271	26	171	14	85	8.8	0.630996	45000	5.25	0.21	4	0.306	0.012	3.92157	0.18483	0.047	0.0026	2013	29	1684	52	1825	36	1000	280	83.6562
Spot115.FIN2	0.0370297	341	13	376	12	260.4	9.4	1.10264	50500	4.325	0.071	1.64162	0.281	0.0046	1.63701	0.55924	0.0715	0.0013	1833	16	1596	23	1702	14	1384	34	87.0704
Spot116.FIN2	0.0428408	271.2	5.5	368.3	7.6	226.4	6.2	1.35804	43650	4.225	0.073	1.72781	0.2722	0.0047	1.72667	0.63817	0.0673	0.0012	1833	15	1549	24	1676	14	1304	37	84.5063
Spot117.FIN2	0.0869767	99.4	4.5	124.2	5.6	103.1	4.7	1.2495	21500	5.4	0.089	1.64815	0.3436	0.0053	1.54249	0.45046	0.0902	0.0017	1881	17	1902	25	1880	14	1736	93	101.116
Spot119.FIN2	0.110979	74.3	4.1	118.9	5.4	77	3.7	1.60027	16850	5.157	0.087	1.68703	0.3327	0.0051	1.53291	0.46282	0.0713	0.0014	1854	17	1848	25	1847	14	1390	100	99.6764
Spot120.FIN2	0.0269258	285	12	102.4	5.7	82	4.2	0.359298	69450	5.182	0.065	1.25434	0.347	0.0044	1.26801	0.65803	0.0907	0.002	1787	12	1917	21	1845	11	1640	110	107.275
Spot122.FIN2	0.0564103	138.2	4.7	158.5	5.2	126.4	4	1.14689	33150	5.372	0.072	1.34028	0.3422	0.0048	1.40269	0.61746	0.0877	0.0015	1887	12	1897	23	1879	12	1643	60	100.53
Spot123.FIN2	0.0907767	86.7	3.6	168.1	6.9	126.1	5.3	1.93887	20600	5.383	0.083	1.54189	0.3457	0.0051	1.47527	0.48232	0.0816	0.0014	1864	16	1909	24	1883	13	1504	65	102.414
Spot124.FIN2	0.0481338	199.5	5.7	324.4	8.6	223.2	6.6	1.62607	38850	4.493	0.071	1.58024	0.279	0.0043	1.54122	0.47497	0.0747	0.0014	1925	17	1587	21	1729	13	1349	42	82.4416
Spot125.FIN2	0.0335727	287.5	9.6	143.4	4	91	3.1	0.498783	55700	4.307	0.059	1.36986	0.2916	0.0041	1.40604	0.67822	0.0683	0.0013	1779	12	1650	20	1692	11	1297	61	92.7487
Spot126.FIN2	0.0869767	92.7	3.3	114.9	5.5	97.4	4.6	1.23948	21500	5.558	0.084	1.51134	0.3604	0.0054	1.49834	0.544	0.0944	0.0019	1855	15	1983	26	1907	13	1815	88	106.9
Spot127.FIN2	0.0396186	274	12	404	17	267	12	1.47445	47200	5.654	0.07	1.23806	0.346	0.0046	1.32948	0.6411	0.0705	0.001	1946	12	1915	22	1923	11	1364	34	98.407
Spot128.FIN2	0.0377397	282.6	9.5	53.9	2.3	49	1.9	0.190729	49550	5.472	0.083	1.51681	0.3561	0.0052	1.46026	0.68719	0.1023	0.0031	1836	13	1961	25	1889	13	1860	220	106.808
Spot130.FIN2	0.0632826	223.8	5.5	162.1	2.6	124.5	2.8	0.724307	29550	4.05	0.07	1.7284	0.2791	0.0048	1.71981	0.56224	0.0806	0.0016	1732	18	1589	24	1643	14	1545	70	91.7436
Spot132.FIN2	0.0664298	170.8	6.1	339	12	270.6	9.7	1.98478	28150	5.42	0.08	1.47601	0.341	0.0046	1.34897	0.51599	0.0856	0.0013	1877	15	1887	22	1884	13	1594	42	100.533
Spot133.FIN2	0.0282264	396	14	373	15	298	12	0.941919	66250	5.256	0.061	1.16058	0.34	0.0043	1.26471	0.6376	0.0869	0.0012	1827	11	1883	21	1859.7	9.9	1670	38	103.065
Spot134.FIN2	0.113265	96.1	3.2	116.2	3.5	95.3	3	1.20916	16510	5.368	0.087	1.62072	0.3402	0.0052	1.52851	0.50624	0.0877	0.0017	1853	17	1885	25	1877	14	1675	99	101.727
Spot135.FIN2	0.102186	105.7	4.8	74.5	3	36.5	2.2	0.704825	18300	5.275	0.087	1.64929	0.3413	0.0055	1.61149	0.43971	0.0514	0.0019	1811	18	1894	26	1860	14	1060	180	104.583
Spot137.FIN2	0.0743539	159.9	6	227	11	124.8	5.5	1.41964	25150	4.657	0.071	1.52459	0.3085	0.0046	1.49109	0.60061	0.0669	0.002	1774	15	1733	23	1759	13	1348	72	97.6888
Spot138.FIN2	0.073622	197	12	132	7.5	50	3.7	0.670051	25400	3.522	0.085	2.4134	0.2471	0.0051	2.06394	0.48545	0.0406	0.0014	1640	29	1419	26	1532	19	780	130	86.5244
Spot139.FIN2	0.0555721	238	12	302	17	181	12	1.26891	33650	4.496	0.062	1.379	0.2782	0.0043	1.54565	0.61997	0.0613	0.0011	1880	14	1580	21	1728	12	1217	52	84.0426
Spot140.FIN2	0.102186	106.4	4.6	175.1	8	140.7	6	1.64568	18300	5.301	0.085	1.60347	0.337	0.0053	1.5727	0.49109	0.0881	0.0017	1842	17	1868	25	1867	13	1698	92	101.412
Spot142.FIN2	0.0696462	151.4	7.3	210	6.6	164.6	5.4	1.38705	26850	5.145	0.074	1.43829	0.3409	0.0049	1.43737	0.57092	0.0848	0.0014	1782	14	1888	23	1844	12	1627	54	105.948
Spot143.FIN2	0.0610114	180.3	4.7	331.8	8.5	225.5	8.2	1.84027	30650	5.25	0.089	1.69524	0.3275	0.0053	1.61832	0.59927	0.0701	0.0015	1862	16	1827	26	1862	15	1328	53	98.1203
Spot144.FIN2	0.0834821	127.9	5	122.9	6.7	98.5	5.2	0.960907	22400	5.395	0.082	1.51993	0.3411	0.005	1.46585	0.59129	0.0874	0.0018	1855	15	1891	24	1885	13	1540	140	101.941
Spot146.FIN2	0.0368836	318	10	439	14	353.2	9.8	1.3805	50700	5.48	0.11	2.0073	0.3193	0.0055	1.72252	0.61193	0.0837	0.0018	1978	20	1784	27	1898	17	1477	43	90.1921
Spot147.FIN2	0.0488251	284	26	239	22	126	12	0.841549	38300	4.38	0.1	2.28311	0.2964	0.0065	2.19298	0.46991	0.05	0.002	1710	21	1668	32	1703	19	1040	240	97.5439
Spot148.FIN2	0.0589905	261	18	105.8	7	32.8	2.7	0.405364	31700	4.138	0.078	1.88497	0.2652	0.0058	2.18703	0.53874	0.0337	0.0015	1830	21	1513	30	1658	16	700	180	82.6776
Spot149.FIN2	0.193782	67.4	4.4	48.3	3.7	35.7	2.6	0.716617	9650	4.8	0.11	2.29167	0.3254	0.0064	1.96681	0.42805	0.0811	0.0036	1744	23	1816	31	1784	19	1500	430	104.128
Spot150.FIN2	0.0363813	362.4	5.2	482.5	9.7	334.4	6.7	1.3314	51400	5.052	0.083	1.64291	0.3183	0.005	1.57085	0.58805	0.0723	0.001	1836	15	1781	24	1823	14	1402	31	97.0044
Spot151.FIN2	0.055081	271	4.8	377.9	5.4	238.2	5.3	1.39446	33950	4.466	0.07	1.5674	0.2831	0.0045	1.58954	0.59793	0.0656	0.0011	1835	15	1605	22	1723	13	1253	37	87.4659
Spot152.FIN2	0.073463	169.7	2.5	140.9	4.3	103.3	3.5	0.830289	25455	5.389	0.078	1.44739	0.338	0.0048	1.42012	0.572	0.0797	0.0016	1853	15	1874	23	1885	13	1610	87	101.133
Spot154.FIN2	0.0474018	306.9	8.5	208.2	7.1	113.5	4.3	0.678397	39450	4.565	0.07	1.53341	0.2982	0.0048	1.60966	0.59491	0.0554	0.0012	1777	16	1686	24	1744	13	1065	66	94.879
Spot155.FIN2	0.0723404	174.4	5.6	301.4	9.7	222.6	7	1.72821	25850	5.24	0.071	1.35496	0.3317	0.0049	1.47724	0.52734	0.0791	0.0013	1843	14	1845	24	1857	12	1509	46	100.109
Spot156.FIN2	0.0954082	137.2	5.7	188.5	8.5	131.3	5.8	1.37391	19600	5.118	0.09	1.7585	0.3281	0.0054	1.64584	0.52428	0.0746	0.0015	1822	17	1832	26	1839	15	1433	79	100.549
Spot157.FIN2	0.139656	92.4	1.9	88.7	3.5	74.5	3.2	0.959957	13390	4.55	0.084	1.84615	0.3085	0.0049	1.58833	0.50305	0.089	0.0021	1730	17	1733	24	1737	15	1540	130	100.173
Spot159.FIN2	0.0521618	235	10	386	16	359	18	1.64255	35850	5.17	0.11	2.12766	0.3313	0.0078	2.35436	0.68213	0.0954	0.0022	1843	19	1847	37	1849	19	1822	58	100.217
Spot160.FIN2	0.0958974	129.8	3.3	170.5	3.1	131.5	5.4	1.31356	19500	5.21	0.12	2.30326	0.3321	0.0076	2.28847	0.49781	0.0772	0.003	1862	20	1846	37	1847	19	1430	100	99.1407
Spot161.FIN2	0.133096	88.8	4	99	3.6	95.8	3.5	1.11486	14050	5.77	0.1	1.7331	0.368	0.007	1.90217	0.52164	0.1066	0.0025	1864	19	2018	33	1941	16	2010	140	108.262
Spot162.FIN2	0.175094	73.2	3.1	119.2	4.9	102.5	4.5	1.62842	10680	5.31	0.11	2.07156	0.3414	0.0064	1.87463	0.43416	0.0953	0.0022	1865	21	1888	31	1865	17	1810	120	101.233
Spot163.FIN2	0.0506775	250	11	202.7	7	184.1	7.3	0.8108	36900	5.415	0.081	1.49584	0.3486	0.0059	1.69248	0.634	0.0989	0.0018	1851	14	1926	28	1882	13	1942	68	104.052
Spot164.FIN2	0.100268	130	4.4	160.9	4.5	135.9	4.3	1.23769	18650	5.376	0.083	1.5439	0.3472	0.0054	1.5553	0.47975	0.0931	0.0018	1850	16	1918	25	1878	13	1709	88	103.676
Spot165.FIN2	0.125926	106.6	4.3	139.5	6.1	123.7	6.1	1.30863	14850	5.46	0.1	1.8315	0.3421	0.0058	1.69541	0.51792	0.0939	0.0019	1893	18	1897	28	1895	16	1730	110	100.211
Spot166.FIN2	0.0666667	199	10	111.9	5.8	106.3	6.1	0.562312	28050	5.436	0.085	1.56365	0.3415	0.0061	1.78624	0.56571	0.101	0.0023	1912	18	1889	30	1887	14	1910	140	98.7971
Spot167.FIN2	0.0731898	331.6	8.3	445	12	180.7	6.1	1.34198	25550	2.652	0.059	2.22474	0.1844	0.0047	2.54881	0.60025	0.0451	0.0011	1746	22	1090	25	1316	17	847	40	62.4284
Spot170.FIN2	0.0287692	551	25	430	14	334	18	0.780399	65000	4.421	0.092	2.08098	0.2871	0.0077	2.68199	0.6689	0.0759	0.0022	1848	21	1619	38	1717	17	1448	54	87.6082
Spot171.FIN2	0.157209	78	3.1	78.7	3.2	73.6	3.5	1.00897	11895	5.67	0.12	2.1164	0.3621	0.0072	1.9884	0.53475	0.0995	0.0025	1885	20	1985	34	1924	17	1920	170	105.305
Spot172.FIN2	0.0433372	293	14	314	11	252.8	9.9	1.07167	43150	5.326	0.077	1.44574	0.3432	0.0053	1.54429	0.60353	0.085	0.0013	1834	14	1901	25	1871	12	1655	44	103.653
Spot174.FIN2	0.256164	49.4	1.5	62.2	1.4	50.9	1.7	1.25911	7300	5.35	0.12	2.24299	0.3428	0.0067	1.95449	0.49294	0.0875	0.0024	1880	23	1901	32	1869	19	1720	180	101.117
Spot175.FIN2	0.132016	99.9	2.6	44.15	0.77	36.7	1.2	0.441942	14165	5.121	0.089	1.73794	0.3284	0.0058	1.76614	0.54986	0.0876	0.0026	1852	18	1823	28	1835	15	1620	240	98.4341
Spot178.FIN2	0.156485	144.5	7.3	112.5	5.2	60.5	3.3	0.778547	11950	3.295	0.066	2.00303	0.2367	0.0049	2.07013	0.47199	0.058	0.0017	1694	23	1365	25	1477	15	1150	140	80.5785
Spot179.FIN2	0.152033	104	5	128.3	6.7	103.6	5.7	1.23365	12300	5.33	0.11	2.06379	0.3357	0.0063	1.87668	0.42971	0.0892	0.0021	1885	22	1866	30	1870	18	1650	130	98.992
Spot180.FIN2	0.0650435	263	11	163.5	5.4	136.5	4	0.621673	28750	5.28	0.11	2.08333	0.3355	0.0068	2.02683	0.68729	0.0913	0.0022	1852	18	1857	32	1862	18	1667	90	100.27
Spot181.FIN2	0.111642	148.9	5.6	171.6	7.1	136.6	5.7	1.15245	16750	5.314	0.085	1.59955	0.3404	0.0057	1.6745	0.5228	0.0859	0.0017	1863	17	1883	27	1868	13	1633	88	101.074
Spot182.FIN2	0.171638	96.5	1.6	137.1	2.5	109.6	2.5	1.42073	10895	5.5	0.12	2.18182	0.3481	0.0082	2.35564	0.53058	0.083	0.0021	1887	25	1928	39	1896	19	1440	110	102.173
Spot183.FIN2	0.301127	56.4	1.3	113	3.1	91.3	2.9	2.00355	6210	5.18	0.12	2.3166	0.3342	0.0069	2.06463	0.39395	0.0876	0.0022	1866	25	1856	33	1839	19	1550	130	99.4641
Spot184.FIN2	0.429392	41.7	1.2	51.9	1.2	45.8	1.8	1.2446	4355	5.11	0.15	2.93542	0.3306	0.009	2.72232	0.4839	0.0916	0.0032	1877	31	1830	43	1841	25	1630	280	97.496
Spot185.FIN2	0.0653846	269	13	268	12	236	12	0.996283	28600	5.25	0.12	2.28571	0.3419	0.008	2.33987	0.64013	0.0907	0.0021	1847	18	1889	38	1859	19	1754	72	102.274
Spot186.FIN2	0.129861	143.7	5.9	161.7	5.4	96.4	4	1.12526	14400	4.86	0.11	2.26337	0.3276	0.0074	2.25885	0.52311	0.0626	0.0019	1750	25	1822	36	1786	20	1190	130	104.114
Spot187.FIN2	0.129412	158.2	7.5	366	14	181.6	9.2	2.31353	14450	4.679	0.099	2.11584	0.3095	0.0063	2.03554	0.37597	0.05	0.0014	1814	25	1736	30	1764	17	985	72	95.7001
Spot188.FIN2	0.212138	90.7	3.2	75.2	2.4	64.4	2.4	0.829107	8815	5.37	0.11	2.04842	0.3445	0.0064	1.85776	0.4125	0.0905	0.0025	1877	20	1908	31	1883	17	1700	220	101.652
Spot191.FIN2	0.15309	179.3	5.2	83.2	3.2	64.3	3.4	0.464027	12215	3.83	0.097	2.53264	0.2906	0.0069	2.3744	0.36633	0.0763	0.0032	1536	29	1640	34	1600	21	1660	260	106.771
Spot193.FIN2	0.38837	86.7	2.7	107.8	2.9	42.5	1.8	1.24337	4815	3.68	0.11	2.98913	0.2448	0.007	2.85948	0.30356	0.0418	0.0019	1843	36	1407	36	1556	24	720	210	76.3429
Spot194.FIN2	0.315346	78.6	3.3	74.5	3.1	66.9	3.5	0.947837	5930	5.44	0.14	2.57353	0.342	0.0079	2.30994	0.44001	0.0916	0.0029	1902	25	1897	38	1885	21	1740	260	99.7371
Spot195.FIN2	0.151417	164.7	8.2	83.7	3.8	71.8	3.5	0.508197	12350	5.3	0.099	1.86792	0.3321	0.0059	1.77657	0.49832	0.0858	0.0026	1889	19	1850	29	1864	16	1430	260	97.9354
Spot196.FIN2	0.0775934	281	14	43.2	2	37.9	2.1	0.153737	24100	5.31	0.094	1.77024	0.3393	0.0061	1.79782	0.54263	0.0869	0.0038	1836	17	1882	30	1870	15	1500	430	102.505
Spot197.FIN2	0.162326	98.2	3.5	130.1	4	107.2	3.7	1.32485	11520	5.31	0.1	1.88324	0.3341	0.0063	1.88566	0.4877	0.083	0.0018	1893	20	1855	30	1864	16	1600	110	97.9926
Spot198.FIN2	0.149004	100.1	5.4	210	11	176.1	9.5	2.0979	12550	5.27	0.11	2.08729	0.337	0.006	1.78042	0.50367	0.0843	0.0019	1851	20	1874	29	1854	17	1667	99	101.243
Spot199.FIN2	0.112991	117.1	4.5	93.7	3	98.3	3.5	0.800171	16550	5.75	0.12	2.08696	0.3701	0.0078	2.10754	0.53072	0.105	0.003	1838	22	2030	36	1933	18	2010	160	110.446
Spot200.FIN2	0.13381	105.1	2.9	183.8	4.5	144.6	3.7	1.74881	13975	5.281	0.097	1.83677	0.3359	0.0059	1.75648	0.47454	0.0815	0.0016	1832	19	1870	28	1858	16	1573	78	102.074
Spot201.FIN2	0.730469	25.3	1	21.15	0.95	13.28	0.77	0.835968	2560	3.6	0.13	3.61111	0.2592	0.0075	2.89352	0.36444	0.0806	0.0059	1664	42	1483	38	1528	29	1100	730	89.1226
Spot202.FIN2	0.293564	47.9	2.3	68.2	3.1	58.1	3.2	1.4238	6370	5.37	0.14	2.60708	0.3365	0.008	2.37741	0.43623	0.085	0.0023	1866	27	1864	38	1867	22	1610	240	99.8928
Spot204.FIN2	0.396186	38.2	1.3	73.5	2.4	59.4	2	1.92408	4720	5.63	0.15	2.6643	0.3433	0.0088	2.56336	0.40248	0.0867	0.0027	1947	32	1889	42	1899	22	1570	220	97.0211
Spot205.FIN2	0.140075	117.9	3.4	143.5	5.6	101.2	4.1	1.21713	13350	4.825	0.091	1.88601	0.3279	0.0054	1.64684	0.45634	0.0766	0.0017	1707	20	1825	26	1792	16	1480	110	106.913
Spot206.FIN2	0.28725	58.2	2.9	78.9	4.1	62.7	3.5	1.35567	6510	5.27	0.12	2.27704	0.3317	0.0073	2.20078	0.37697	0.083	0.0025	1868	26	1856	36	1863	19	1610	230	99.3576
Spot207.FIN2	0.185516	102.8	4.5	153.2	5.7	125.7	5.3	1.49027	10080	5.46	0.11	2.01465	0.3445	0.0066	1.91582	0.53452	0.0863	0.002	1829	21	1909	31	1890	18	1730	100	104.374
Spot208.FIN2	0.232732	101.3	5.3	89.5	4.6	60.8	3.3	0.883514	8035	4.304	0.099	2.30019	0.2981	0.006	2.01275	0.4681	0.0735	0.0021	1662	25	1681	30	1683	19	1380	210	101.143
Spot209.FIN2	0.285278	70.7	2.8	123	4.4	97	3.8	1.73975	6555	5.39	0.13	2.41187	0.3421	0.0073	2.13388	0.38553	0.0842	0.002	1878	27	1890	35	1874	21	1730	120	100.639
Spot210.FIN2	0.136996	174.1	8.1	326	13	212	10	1.87249	13650	4.77	0.1	2.09644	0.2986	0.0065	2.17683	0.49132	0.0685	0.0017	1851	22	1678	32	1776	18	1297	67	90.6537
Spot212.FIN2	0.383197	58.6	3.1	76.5	3.3	70	3.9	1.30546	4880	5.38	0.16	2.97398	0.3282	0.0091	2.7727	0.43367	0.0904	0.0029	1958	33	1824	44	1863	26	1990	220	93.1563
Spot213.FIN2	0.15008	149.5	6.2	143.7	5.4	123.7	5.3	0.961204	12460	5.3	0.1	1.88679	0.3282	0.0068	2.07191	0.48076	0.0916	0.0022	1898	22	1822	33	1868	17	1820	130	95.9958
Spot215.FIN2	0.239283	89.6	3.6	115.7	3.6	103.9	3.9	1.29129	7815	5.46	0.12	2.1978	0.3345	0.0078	2.33184	0.50805	0.0897	0.0023	1900	24	1853	38	1889	19	1710	160	97.5263
Spot216.FIN2	0.49734	43.6	1.5	49.2	1.5	43.1	1.9	1.12844	3760	5.32	0.15	2.81955	0.3262	0.0088	2.69773	0.38482	0.0878	0.0035	1935	34	1813	43	1855	24	1840	340	93.6951
Spot217.FIN2	1.08092	18.66	0.82	21.14	0.77	20.3	1.1	1.1329	1730	5.49	0.26	4.73588	0.346	0.014	4.04624	0.37162	0.0994	0.0054	2005	54	1883	67	1865	42	1770	770	93.9152
Spot219.FIN2	0.157873	120.1	4.3	117	3.7	111.5	4.6	0.974188	11845	5.3	0.14	2.64151	0.3571	0.0094	2.63232	0.57908	0.0936	0.0032	1754	26	1969	44	1858	22	1620	180	112.258
Spot220.FIN2	0.153279	114.8	6.3	116.2	6.1	112.9	6.6	1.0122	12200	5.56	0.12	2.15827	0.3519	0.0078	2.21654	0.53486	0.0941	0.0026	1856	21	1946	37	1913	18	1730	190	104.849
Spot221.FIN2	0.221433	84	2.5	91.6	2.9	84.2	3.7	1.09048	8445	5.51	0.11	1.99637	0.3341	0.007	2.09518	0.49833	0.0888	0.0026	1931	21	1853	34	1896	18	1660	180	95.9606
Spot222.FIN2	0.4	46	1.7	61.7	2	52.5	2.2	1.3413	4675	5.3	0.15	2.83019	0.3337	0.0089	2.66707	0.485	0.0863	0.003	1896	28	1842	43	1862	23	1330	290	97.1519
Spot223.FIN2	0.215935	82.4	3.5	99.5	3.8	83.7	3.6	1.20752	8660	5.38	0.13	2.41636	0.3409	0.0074	2.17072	0.51311	0.0837	0.0022	1859	23	1880	35	1868	20	1630	190	101.13
Spot224.FIN2	0.304808	61.8	2.3	49	2.3	45.7	2.8	0.79288	6135	4.84	0.12	2.47934	0.3243	0.0077	2.37434	0.42282	0.089	0.0036	1799	27	1800	37	1786	20	840	470	100.056
Spot225.FIN2	0.171089	101.2	4.5	190	7.1	182	8.3	1.87747	10930	5.6	0.17	3.03571	0.368	0.011	2.98913	0.52309	0.0962	0.0029	1822	30	2008	53	1914	25	1860	130	110.209
Spot230.FIN2	0.170776	155.8	6.3	109.8	5	89.3	4.5	0.70475	10950	5.15	0.11	2.13592	0.3367	0.006	1.782	0.49824	0.086	0.0024	1805	21	1865	29	1840	18	1590	180	103.324
Spot231.FIN2	0.0896882	296	13	71.2	1.7	63.1	2.2	0.240541	20850	5.446	0.097	1.78112	0.3513	0.0064	1.8218	0.58036	0.0916	0.003	1827	18	1936	31	1886	15	1450	250	105.966
Spot232.FIN2	0.189176	135.9	6.2	171.3	8.7	138.9	8.2	1.26049	9885	5.61	0.15	2.6738	0.372	0.01	2.68817	0.51339	0.0804	0.0024	1827	29	2037	47	1918	23	1430	150	111.494
Spot233.FIN2	0.290598	94.3	4.1	109.3	4.4	65.8	3.2	1.15907	6435	4.96	0.13	2.62097	0.3244	0.0075	2.31196	0.40631	0.0625	0.002	1839	28	1805	36	1806	22	1000	220	98.1512
Spot234.FIN2	0.676311	33.4	1.6	54.3	2.8	38.4	1.9	1.62575	2765	6.17	0.21	3.40357	0.399	0.011	2.75689	0.39839	0.0751	0.0032	1889	37	2141	50	1972	29	1660	370	113.34
Spot235.FIN2	0.311667	77.8	4.7	100.8	5.2	80.5	5.2	1.29563	6000	5.19	0.15	2.89017	0.3325	0.0088	2.64662	0.53006	0.0772	0.0026	1866	31	1850	43	1835	25	1150	230	99.1426
Spot236.FIN2	0.317218	78.8	3.4	103.1	4.4	69.9	3.4	1.30838	5895	5.17	0.12	2.32108	0.3316	0.0074	2.2316	0.48442	0.0727	0.0022	1877	24	1839	35	1846	20	1290	220	97.9755
Spot237.FIN2	0.403888	75.3	2.9	145	6.6	61.9	3.5	1.92563	4630	3.77	0.13	3.44828	0.2388	0.0074	3.09883	0.39739	0.0448	0.002	1888	36	1381	39	1577	27	840	180	73.1462
Spot238.FIN2	0.107471	223.9	6.9	171.5	7.4	118.6	5.7	0.765967	17400	4.693	0.08	1.70467	0.3179	0.0051	1.60428	0.56777	0.0726	0.0019	1733	16	1780	25	1758	14	1140	160	102.712
Spot239.FIN2	0.181377	133.7	2.6	258	13	172.8	8.3	1.92969	10310	5.13	0.095	1.85185	0.3216	0.0061	1.89677	0.43599	0.0726	0.0016	1874	23	1800	29	1837	16	1392	82	96.0512
Spot240.FIN2	0.275	84.5	6.1	80.1	5.8	47	3.8	0.947929	6800	5.35	0.14	2.61682	0.334	0.0079	2.36527	0.4191	0.0647	0.0032	1854	30	1853	38	1861	23	1290	420	99.9461
Spot242.FIN2	0.155833	153	9.9	159	11	119.9	9.2	1.03922	12000	5.43	0.16	2.94659	0.349	0.009	2.5788	0.39669	0.0736	0.0026	1816	32	1925	43	1884	25	1400	200	106.002
Spot244.FIN2	0.1496	183	9.3	161.8	7.8	117.9	5.6	0.884153	12500	4.818	0.096	1.99253	0.3219	0.0063	1.95713	0.52405	0.0841	0.0025	1732	21	1799	31	1788	17	1460	180	103.868
Spot245.FIN2	0.16556	156.4	6.7	331	14	233	11	2.11637	11295	5.37	0.11	2.04842	0.3358	0.0065	1.93568	0.44699	0.0782	0.0017	1837	22	1868	32	1873	18	1437	78	101.688
Spot246.FIN2	0.161207	152.5	8.5	157.8	9.3	123.8	7.1	1.03475	11600	5.67	0.12	2.1164	0.3504	0.0075	2.14041	0.51326	0.0875	0.0024	1861	22	1936	36	1926	17	1670	220	104.03
Spot247.FIN2	0.281839	89	3.7	117.3	5.4	87.9	4.4	1.31798	6635	5.26	0.12	2.28137	0.3313	0.0074	2.23363	0.46119	0.0779	0.0022	1830	28	1835	36	1859	19	1380	180	100.273
Spot248.FIN2	0.294256	88.3	4.5	77.2	3.9	57.3	3.3	0.874292	6355	4.72	0.12	2.54237	0.3065	0.0067	2.18597	0.43019	0.0767	0.0029	1773	28	1719	33	1762	21	1300	340	96.9543
Spot249.FIN2	0.319658	76.7	3.9	129.8	6.9	90.6	5.3	1.69231	5850	5.35	0.13	2.42991	0.3241	0.0076	2.34496	0.39769	0.0729	0.0023	1898	28	1810	36	1871	20	1110	240	95.3635
Spot250.FIN2	0.239744	111.1	7.6	140.1	8.7	105.2	6.7	1.26103	7800	4.6	0.13	2.82609	0.302	0.0078	2.58278	0.43237	0.0757	0.0023	1756	33	1693	38	1753	23	1540	220	96.4123
Spot251.FIN2	0.0842342	300	20	242	16	188	13	0.806667	22200	4.97	0.12	2.41449	0.3296	0.0078	2.3665	0.60134	0.0776	0.0026	1694	23	1836	38	1812	21	1450	170	108.383
Spot253.FIN2	0.758621	30.3	1.5	64.1	3.5	56.4	3.1	2.11551	2465	5.86	0.22	3.75427	0.355	0.012	3.38028	0.36627	0.0861	0.0036	1930	52	1935	57	1938	34	1550	430	100.259
Spot254.FIN2	0.526761	50.1	2.8	44.5	2.5	37.7	2.6	0.888224	3550	5.44	0.2	3.67647	0.338	0.012	3.5503	0.22087	0.0819	0.0049	1959	52	1873	58	1886	32	1100	720	95.61
Spot255.FIN2	0.603226	43.6	2.4	56.9	3.1	49.8	3.2	1.30505	3100	5.66	0.26	4.59364	0.353	0.014	3.96601	0.59295	0.0797	0.0043	1877	47	1929	65	1916	39	1610	510	102.77
Spot256.FIN2	0.163676	164.2	5.5	244.8	9.3	196.8	8.5	1.49086	11425	5.01	0.14	2.79441	0.3359	0.0083	2.47097	0.53766	0.0726	0.0022	1707	26	1861	40	1813	23	1440	110	109.022
1 data not corrected for common-Pb
2 Concordance calculated as (206Pb-238U age/207Pb-206Pb age)*100
f206c = the proportion of the 206Pb ion beam that is common, calculated as (206Pb204Pbmodel/206Pb204Pb measured)* 100
where 206Pb204Pb measured = (Stacey and Kramers, 1975) 206Pb/204Pb ratio at the apparent (non-common Pb corrected) 207Pb/206Pb age
	Grains excluded from the analysis due Pb loss

## Sheet: MAR17-2(8)
Spot	f206	U		Th		Pb		Th/U		Isotopic Ratios1									Ages (Ma)1								% conc2
	(%)	(mg.g-1)	2σ	(mg.g-1)	2σ	(mg.g-1)	2σ	calculated	206Pb/204Pb	207Pb/235U	1σ	1σ %	206Pb/238U	1σ	1σ %	Rho	208Pb/232Th	1σ	207Pb/206Pb	2σ	206Pb/238U	2σ	207Pb/235U	2σ	208Pb/232Th	2σ
Spot59.FIN2	0.0293103	772	28	421	10	274.7	8.1	0.545337	63800	2.965	0.052	1.75379	0.2338	0.0048	2.05304	0.58542	0.0666	0.0013	1440	18	1352	25	1396	13	1281	48	93.8889
Spot60.FIN2	0.034986	449	26	151.3	7.3	129.2	6.5	0.336971	53450	4.906	0.074	1.50836	0.3237	0.0051	1.57553	0.63419	0.0891	0.0019	1784	15	1814	25	1805	13	1560	120	101.682
Spot61.FIN2	0.0912195	185.4	6.9	165	5.4	127.3	4.4	0.889968	20500	4.699	0.082	1.74505	0.3061	0.0054	1.76413	0.54248	0.0817	0.0018	1829	18	1720	26	1766	14	1415	95	94.0405
Spot64.FIN2	0.0587127	284.7	9.2	261	12	211.8	9	0.916754	31850	4.758	0.084	1.76545	0.3102	0.0055	1.77305	0.58976	0.0839	0.0017	1814	18	1737	27	1777	15	1614	74	95.7552
Spot67.FIN2	0.137906	107	3.6	116.3	3.8	103.6	3.8	1.08692	13560	5.7	0.11	1.92982	0.3427	0.0066	1.92588	0.57088	0.0952	0.0022	1970	19	1896	32	1926	17	1610	140	96.2437
Spot69.FIN2	0.0882075	202	6.8	203.4	5.2	158.3	5.1	1.00693	21200	4.172	0.092	2.20518	0.2698	0.0069	2.55745	0.58648	0.087	0.0022	1868	22	1536	35	1665	18	1500	96	82.227
Spot70.FIN2	0.23626	2509	54	1252	24	67	2.1	0.499004	7915	0.1731	0.0039	2.25303	0.00823	0.0002	2.43013	0.49365	0.00575	0.00016	2407	23	52.9	1.3	161.4	3.4	38	16	2.19776
Spot71.FIN2	0.135655	107.3	3.4	82.4	1.8	70.2	2	0.76794	13785	5.579	0.095	1.70281	0.3374	0.0059	1.74867	0.43164	0.0909	0.0022	1936	20	1873	28	1906	15	1690	160	96.7459
Spot72.FIN2	0.152033	150.4	7	162.4	6.2	109.9	4.8	1.07979	12300	3.134	0.092	2.93555	0.2054	0.0056	2.72639	0.53087	0.0766	0.0023	1820	29	1199	30	1442	22	1320	140	65.8791
Spot73.FIN2	0.0834821	241.3	7.1	255.9	9.4	165.6	5.9	1.06051	22400	3.574	0.058	1.62283	0.2459	0.0043	1.74868	0.5354	0.0715	0.0016	1697	18	1414	22	1538	13	1311	75	83.3235
Spot75.FIN2	0.058805	282.2	5.2	206.3	6.5	155.4	5.4	0.731042	31800	4.505	0.098	2.17536	0.3057	0.0066	2.15898	0.61545	0.0797	0.0017	1736	19	1715	32	1727	18	1417	92	98.7903
Spot77.FIN2	0.110979	141.6	7.6	101.9	4.5	88.8	4.6	0.719633	16850	4.832	0.09	1.86258	0.3078	0.0059	1.91683	0.55731	0.0907	0.0022	1872	19	1725	29	1789	15	1510	150	92.1474
Spot78.FIN2	0.0966408	147	5.4	150.7	4.7	127.5	4.3	1.02517	19350	5.329	0.089	1.67011	0.3415	0.0056	1.63982	0.54399	0.0899	0.0018	1842	18	1891	26	1877	14	1630	100	102.66
Spot79.FIN2	0.068	214	11	396	25	328	20	1.85047	27500	5.329	0.087	1.63258	0.3407	0.006	1.76108	0.54545	0.0914	0.0018	1839	16	1886	28	1872	14	1640	75	102.556
Spot84.FIN2	0.0767967	189.8	7.8	269	11	232.7	9.5	1.41728	24350	5.331	0.09	1.68824	0.3394	0.0055	1.62051	0.56316	0.0919	0.0016	1834	16	1883	26	1873	14	1773	65	102.672
Spot86.FIN2	0.0829268	184.8	6.6	264.7	8.3	215.5	7.7	1.43236	22550	4.987	0.099	1.98516	0.3234	0.0064	1.97897	0.53248	0.0843	0.0018	1800	21	1808	31	1809	17	1542	66	100.444
Spot87.FIN2	0.0699065	221.6	7.5	123.5	4	93	3.5	0.55731	26750	4.587	0.078	1.70046	0.3094	0.0057	1.84228	0.62919	0.0807	0.0019	1711	15	1736	28	1744	14	1530	140	101.461
Spot88.FIN2	0.47044	38	1.7	36.7	1	30.2	1.3	0.965789	3975	4.29	0.14	3.2634	0.2745	0.0085	3.09654	0.42351	0.0855	0.0038	1862	38	1559	43	1690	28	850	460	83.7272
Spot89.FIN2	0.0266003	556	19	116.8	2.7	89.8	3.1	0.210072	70300	5.182	0.087	1.67889	0.3409	0.0065	1.90672	0.66421	0.0767	0.0021	1782	15	1885	31	1849	14	1210	140	105.78
Spot91.FIN2	0.147826	186.2	7.9	216	10	90.4	5.1	1.16004	12650	2.667	0.069	2.58718	0.1642	0.0039	2.37515	0.54954	0.0465	0.0015	1871	25	979	22	1316	19	800	110	52.325
Spot93.FIN2	0.163319	91.1	7.1	80.1	7.8	76.1	7.7	0.879254	11450	5.16	0.11	2.13178	0.3222	0.0072	2.23464	0.46391	0.0943	0.0029	1885	25	1796	35	1842	19	1570	230	95.2785
Spot96.FIN2	0.0730469	282.1	8.9	204	5.6	150.8	6.1	0.723148	25600	3.748	0.079	2.10779	0.2429	0.0056	2.30548	0.68257	0.0758	0.0019	1781	20	1402	29	1579	17	1418	95	78.7198
Spot97.FIN2	0.136996	128.7	5.5	148	4.7	117.5	4	1.14996	13650	4.51	0.09	1.99557	0.2791	0.0055	1.97062	0.52014	0.0878	0.0021	1854	19	1587	28	1734	17	1600	110	85.5987
Spot98.FIN2	0.193082	76.7	3.3	132.1	5.4	110.9	5	1.72229	9685	5.13	0.1	1.94932	0.325	0.0064	1.96923	0.45414	0.0911	0.0021	1843	21	1811	31	1839	17	1730	140	98.2637
Spot99.FIN2	0.0923457	181	5.2	216.5	4.4	159.3	4.2	1.19613	20250	4.037	0.085	2.10552	0.2737	0.0062	2.26525	0.54585	0.082	0.0021	1709	21	1561	31	1641	17	1555	83	91.34
Spot101.FIN2	0.101081	308.3	9.5	258.7	9.1	147.7	5	0.839118	18500	2.297	0.059	2.56857	0.1448	0.0034	2.34807	0.5929	0.063	0.0019	1810	23	870	19	1213	18	1051	88	48.0663
Spot106.FIN2	0.046926	324	12	63	2	53.3	2.1	0.194444	39850	5.152	0.093	1.80512	0.3315	0.0061	1.84012	0.64171	0.0903	0.0031	1800	16	1841	30	1843	16	1050	350	102.278
Spot107.FIN2	0.0576271	251.6	7.1	172	4.6	149.7	5	0.683625	32450	5.11	0.11	2.15264	0.3328	0.007	2.10337	0.60826	0.0922	0.0022	1790	20	1849	33	1837	17	1760	100	103.296
Spot108.FIN2	0.188508	76.8	3.6	129.4	5.7	110.9	5.9	1.6849	9920	5.25	0.11	2.09524	0.3448	0.0072	2.08817	0.56227	0.0921	0.002	1831	22	1906	34	1868	18	1680	160	104.096
Spot109.FIN2	0.124252	147.7	6.9	197.6	8.3	157.7	7.2	1.33785	15050	4.181	0.08	1.91342	0.2662	0.0051	1.91585	0.58844	0.0856	0.0017	1857	19	1519	26	1669	16	1562	92	81.7986
Spot111.FIN2	0.109677	122	5.2	87.2	3.2	77	3.2	0.714754	17050	6.22	0.14	2.2508	0.3557	0.0079	2.22097	0.58633	0.1001	0.0032	2054	20	1957	37	2002	20	1790	210	95.2775
Spot112.FIN2	0.1	150.2	4.2	142.9	3.8	122.7	3.7	0.951398	18700	5.06	0.1	1.97628	0.3144	0.0066	2.09924	0.57753	0.0934	0.002	1899	17	1755	32	1831	17	1710	120	92.4171
Spot113.FIN2	0.0437427	315	16	259	11	224.7	9.7	0.822222	42750	6.019	0.091	1.51188	0.3605	0.0057	1.58114	0.5984	0.0941	0.0016	1958	15	1985	27	1976	13	1767	68	101.379
Spot114.FIN2	0.0848073	203	11	359	21	288	16	1.76847	22050	4.877	0.097	1.98893	0.3019	0.0061	2.02054	0.59899	0.0855	0.0018	1893	19	1698	30	1791	17	1651	63	89.6989
Spot115.FIN2	0.0288136	551	26	480	19	428	19	0.871143	64900	5.19	0.11	2.11946	0.3314	0.0074	2.23295	0.71642	0.0929	0.0021	1831	17	1844	36	1845	18	1729	52	100.71
Spot118.FIN2	0.140075	103.2	5	152.8	5.3	127.5	4.6	1.48062	13350	5.51	0.1	1.81488	0.345	0.0062	1.7971	0.45944	0.092	0.0019	1881	20	1905	30	1901	17	1560	100	101.276
Spot123.FIN2	0.103889	147.9	9	103	4.9	84.9	4.3	0.696416	18000	5.16	0.11	2.13178	0.3382	0.0064	1.89237	0.4673	0.0885	0.0025	1808	21	1870	31	1840	17	1540	190	103.429
Spot124.FIN2	0.128966	120	5.8	123.4	6.3	84.7	4.1	1.02833	14500	4.915	0.095	1.93286	0.3207	0.0064	1.99563	0.58087	0.0754	0.0021	1813	19	1787	31	1803	16	1150	160	98.5659
Spot125.FIN2	0.0746507	234	11	204.2	7.6	156.1	6.4	0.87265	25050	4.372	0.083	1.89844	0.283	0.0051	1.80212	0.60617	0.0801	0.0017	1809	17	1602	25	1703	16	1380	99	88.5572
Spot128.FIN2	0.259362	239.8	6.7	128.3	3.4	29.4	1.5	0.535029	7210	1.09	0.033	3.02752	0.0755	0.0019	2.51656	0.37016	0.0249	0.0012	1748	33	469	11	748	16	180	150	26.8307
Spot129.FIN2	0.0772727	194.3	3.7	127.9	2.7	104	3	0.65826	24200	4.81	0.1	2.079	0.3108	0.0069	2.22008	0.60016	0.0893	0.0024	1853	20	1741	34	1779	18	1550	130	93.9557
Spot131.FIN2	0.0727626	199	20	166	17	154	16	0.834171	25700	5.25	0.12	2.28571	0.3357	0.0078	2.3235	0.67519	0.0953	0.0024	1909	19	1861	37	1861	19	1720	200	97.4856
Spot132.FIN2	0.0523077	328	11	160.7	4.7	126.3	4.5	0.489939	35750	4.151	0.077	1.85497	0.2779	0.0051	1.83519	0.61624	0.0836	0.0021	1804	17	1579	25	1660	15	1580	110	87.5277
Spot133.FIN2	0.0785714	198.7	4.4	168.9	4.3	131	4.1	0.850025	23800	4.583	0.089	1.94196	0.3025	0.0068	2.24793	0.56605	0.0839	0.0021	1829	20	1700	34	1741	16	1420	100	92.947
Spot135.FIN2	0.117981	139	11	171	14	108.6	7.9	1.23022	15850	4.95	0.12	2.42424	0.3215	0.0078	2.42613	0.57419	0.071	0.0024	1884	22	1798	38	1808	20	1370	150	95.4352
Spot137.FIN2	0.0638225	360	21	307	8.9	182.3	4.9	0.852778	29300	3.433	0.073	2.12642	0.2272	0.0048	2.11268	0.57655	0.0633	0.0018	1824	20	1318	25	1507	17	1100	66	72.2588
Spot139.FIN2	0.0894309	262.8	6	246.1	4.8	161	4.3	0.936454	20910	2.919	0.057	1.95272	0.208	0.0037	1.77885	0.51185	0.0683	0.0014	1666	20	1218	20	1381	15	1222	54	73.1092
Spot140.FIN2	0.102832	283.1	7.4	389.3	7	210.5	4.9	1.37513	18185	2.631	0.06	2.2805	0.1709	0.0039	2.28204	0.59524	0.0564	0.0013	1833	21	1014	22	1300	17	1070	48	55.3191
Spot141.FIN2	0.0764826	185.7	6.8	176.5	5.9	152.8	5.5	0.950458	24450	6.001	0.095	1.58307	0.3556	0.0059	1.65917	0.5949	0.0926	0.0019	1991	15	1962	28	1969	14	1704	85	98.5434
Spot143.FIN2	0.107781	126.5	6.8	87.7	4.1	79.2	4.1	0.693281	17350	6.1	0.11	1.80328	0.3655	0.0063	1.72367	0.57225	0.0918	0.0023	1950	18	2007	30	1988	16	1530	170	102.923
Spot144.FIN2	0.0757085	2135	75	1113	33	115	5.1	0.521311	24700	0.4566	0.0086	1.88349	0.03158	0.00066	2.08993	0.65481	0.01058	0.00026	1729	18	200.3	4.1	381.2	6	170	15	11.5847
Spot145.FIN2	0.618182	65.6	2.6	73.2	2.3	32.5	1.5	1.11585	3025	1.858	0.078	4.19806	0.1218	0.004	3.28407	0.33082	0.0493	0.0023	1825	53	738	23	1046	28	980	240	40.4384
Spot146.FIN2	0.0691312	356	13	216.9	6.5	111.5	3.5	0.60927	27050	3.167	0.061	1.92611	0.2014	0.0041	2.03575	0.67951	0.054	0.0014	1843	17	1182	22	1449	15	866	74	64.1346
Spot148.FIN2	0.0767967	387	21	187.5	7.6	117.6	5.1	0.484496	24350	2.705	0.059	2.18115	0.185	0.004	2.16216	0.65039	0.064	0.0017	1693	19	1092	22	1328	16	1100	110	64.5009
Spot149.FIN2	0.237611	82.6	2.6	56.8	1.1	39.9	1.4	0.687651	7870	4.32	0.11	2.5463	0.2527	0.0059	2.33478	0.44384	0.0752	0.0027	1997	27	1447	31	1695	21	1370	260	72.4587
Spot150.FIN2	0.116149	132.7	4.7	135.6	3.8	110.8	3.5	1.02185	16100	5.255	0.097	1.84586	0.3366	0.0058	1.72311	0.55458	0.0873	0.002	1829	18	1867	28	1856	16	1570	110	102.078
Spot151.FIN2	0.0263938	586	21	80.5	1.9	44.7	1.8	0.137372	70850	5.75	0.1	1.73913	0.3441	0.0075	2.1796	0.62565	0.0562	0.0021	1950	18	1905	36	1942	16	1070	180	97.6923
Spot153.FIN2	0.0882075	204	11	167.7	4.2	85	2.9	0.822059	21200	4.18	0.075	1.79426	0.285	0.0048	1.68421	0.54865	0.0533	0.0013	1722	17	1617	24	1674	15	871	96	93.9024
Spot154.FIN2	0.0487614	764	11	594	9.6	210.7	4.7	0.777487	38350	2.043	0.053	2.59422	0.133	0.0035	2.63158	0.76622	0.03864	0.00095	1808	19	804	20	1123	18	690	36	44.469
Spot155.FIN2	0.0838565	412	16	615	21	151.5	4.3	1.49272	22300	2.321	0.041	1.76648	0.1544	0.0026	1.68394	0.60656	0.02809	0.00063	1776	16	925	14	1217	13	501	28	52.0833
Spot156.FIN2	0.0905569	208.3	5.7	284.9	5.7	186.2	4.6	1.36774	20650	4.368	0.08	1.8315	0.2832	0.0054	1.90678	0.58388	0.0671	0.0013	1832	18	1605	27	1707	16	1308	57	87.6092
Spot157.FIN2	0.111976	182.8	8.8	76.7	3	54.5	2.5	0.419584	16700	4.263	0.087	2.04082	0.2567	0.0054	2.10362	0.55381	0.0762	0.0026	1971	18	1468	27	1684	17	1440	230	74.48
Spot159.FIN2	0.0916667	280.9	8.8	253.7	7.3	122.8	4	0.903168	20400	3.304	0.079	2.39104	0.2115	0.0044	2.08038	0.53763	0.0479	0.0013	1845	23	1237	23	1483	19	830	69	67.0461
Spot160.FIN2	0.0814815	200.1	5.3	214.3	5.5	168.1	4.5	1.07096	22950	5.137	0.083	1.61573	0.3289	0.0053	1.61143	0.57267	0.0832	0.0016	1866	16	1831	26	1839	14	1553	71	98.1243
Spot161.FIN2	0.10163	225	9.5	167.3	4.4	112.7	3.6	0.743556	18400	3.394	0.069	2.033	0.2421	0.0047	1.94135	0.63436	0.0705	0.0017	1689	17	1392	24	1497	16	1224	84	82.4156
Spot162.FIN2	0.067509	475	18	190.8	6.4	90.5	3.6	0.401684	27700	1.66	0.031	1.86747	0.167	0.003	1.79641	0.57166	0.0502	0.0012	1023	19	996	16	991	12	918	93	97.3607
Spot163.FIN2	0.0311407	571	31	286	19	187.5	8.5	0.500876	60050	4.649	0.077	1.65627	0.3094	0.0058	1.8746	0.60367	0.0742	0.0023	1824	16	1735	28	1758	14	1404	76	95.1206
Spot164.FIN2	0.513032	118.3	4.8	175.8	7	30.4	1.4	1.48605	3645	1.42	0.049	3.4507	0.0892	0.0029	3.25112	0.44391	0.01945	0.00097	1968	38	550	17	892	21	170	120	27.9472
Spot166.FIN2	0.190428	90.6	2.7	135.1	3.5	112.3	3.4	1.49117	9820	4.64	0.11	2.37069	0.3081	0.0068	2.20708	0.575	0.0889	0.0022	1832	21	1727	33	1756	19	1660	120	94.2686
Spot169.FIN2	0.167638	121.3	5.6	100	3.9	103.3	5.1	0.824402	11155	4.92	0.14	2.84553	0.2789	0.0077	2.76085	0.57199	0.1043	0.0033	2107	27	1579	38	1802	23	1330	210	74.9407
Spot170.FIN2	0.0814815	192	8.5	103.1	3.6	103.4	4.2	0.536979	22950	6.01	0.12	1.99667	0.3595	0.0071	1.97497	0.63972	0.1059	0.0028	1994	16	1984	34	1970	17	1860	150	99.4985
Spot171.FIN2	0.10303	207.7	8.7	263.2	8.5	201.3	8	1.26721	18150	4.06	0.11	2.70936	0.2679	0.0065	2.42628	0.53862	0.0759	0.0018	1806	25	1531	33	1635	22	1370	90	84.773
Spot172.FIN2	0.479487	35.8	1.4	42	1.2	36.7	1.5	1.17318	3900	4.81	0.14	2.9106	0.334	0.0089	2.66467	0.33265	0.0939	0.0033	1799	36	1849	43	1777	24	1340	340	102.779
Spot173.FIN2	0.0690037	254.1	9.3	364	11	262.8	7.7	1.43251	27100	4.707	0.082	1.74209	0.3183	0.0057	1.79076	0.60899	0.0774	0.0015	1750	16	1775	28	1766	14	1444	48	101.429
Spot175.FIN2	0.0829268	348	22	447	29	288	19	1.28448	22550	3.149	0.077	2.44522	0.2043	0.0053	2.59422	0.59321	0.066	0.0016	1829	26	1197	29	1441	19	1235	57	65.4456
Spot176.FIN2	0.0899038	202	10	120.1	6	97.2	4	0.594554	20800	4.68	0.089	1.90171	0.3133	0.0063	2.01085	0.60363	0.085	0.0026	1744	17	1750	31	1754	16	1520	150	100.344
Spot177.FIN2	0.153909	109.5	7.7	131.9	8.2	122.6	8.3	1.20457	12150	5.45	0.12	2.20183	0.3371	0.0078	2.31385	0.47377	0.0999	0.0029	1922	25	1871	38	1890	19	1870	200	97.3465
Spot178.FIN2	0.0954569	389.6	7.2	319.3	8.4	117.4	2.8	0.819559	19590	2.286	0.048	2.09974	0.1454	0.0031	2.13205	0.61918	0.03915	0.00098	1870	19	875	17	1208	15	667	51	46.7914
Spot179.FIN2	0.321859	70.5	2.2	73.5	1.6	54.4	1.9	1.04255	5810	3.756	0.099	2.63578	0.2462	0.0067	2.72136	0.45038	0.0763	0.0023	1874	29	1412	34	1571	21	1270	200	75.3469
Spot180.FIN2	0.0951654	275.4	7.5	183.1	5.3	93.3	4	0.664851	19650	3.215	0.086	2.67496	0.2	0.0056	2.8	0.58801	0.0548	0.0018	1885	25	1174	30	1458	21	1070	110	62.2812
Spot182.FIN2	0.0590837	281.1	9.9	246.2	5.8	234.2	7	0.875845	31650	5.301	0.097	1.82984	0.336	0.0063	1.875	0.55063	0.0975	0.0017	1881	18	1864	30	1864	15	1869	63	99.0962
Spot184.FIN2	0.10625	141.3	6.7	173	10	165	10	1.22435	17600	5.25	0.14	2.66667	0.3354	0.0096	2.86225	0.59758	0.1029	0.0028	1867	23	1861	47	1853	23	2020	120	99.6786
Spot185.FIN2	0.0362403	460	11	561	22	540	23	1.21957	51600	5.11	0.11	2.15264	0.343	0.0084	2.44898	0.61503	0.0971	0.0018	1759	21	1899	40	1831	18	1898	45	107.959
Spot187.FIN2	0.123636	147	3.7	193.2	3.5	168.7	3.4	1.31429	15125	4.675	0.088	1.88235	0.296	0.0056	1.89189	0.50166	0.0911	0.0018	1881	20	1668	28	1758	15	1675	76	88.6762
Spot188.FIN2	0.177167	142.9	5.6	165.8	4.7	92.5	4.9	1.16025	10555	3.838	0.099	2.57947	0.2196	0.0051	2.3224	0.40872	0.0551	0.0019	2024	34	1284	27	1603	21	810	110	63.4387
Spot190.FIN2	0.0701689	228	8.6	307.4	9	301	11	1.34825	26650	5.36	0.1	1.86567	0.3446	0.0065	1.88624	0.61915	0.0984	0.0017	1871	17	1905	31	1874	17	1907	48	101.817
Spot191.FIN2	7.29534	3990	100	4503	86	137.8	4.5	1.12857	256.328	0.1849	0.0045	2.43375	0.01123	0.00029	2.58237	0.66271	0.003377	9.2e-05	1958	22	71.9	1.8	172	3.8	34.3	5.4	3.67211
Spot192.FIN2	0.113196	147.6	2.1	145.9	2.2	126.1	2.6	0.988482	16520	4.949	0.089	1.79834	0.3193	0.0058	1.81647	0.55087	0.0892	0.0019	1884	19	1783	28	1811	15	1652	92	94.6391
Spot193.FIN2	0.116113	191.3	4.3	181.7	6	137.2	4.5	0.949817	16105	3.851	0.098	2.54479	0.2491	0.0065	2.60939	0.62184	0.0748	0.0021	1866	25	1437	34	1601	20	1360	92	77.0096
Spot194.FIN2	0.0748599	207.2	3.8	181.7	6	156.6	5.2	0.876931	24980	4.898	0.094	1.91915	0.3491	0.0067	1.91922	0.56733	0.0929	0.0019	1686	19	1925	32	1798	16	1604	95	114.176
Spot195.FIN2	0.0963918	175.8	7.3	163.7	4.6	139.7	5	0.931172	19400	5.037	0.099	1.96546	0.3226	0.0067	2.07688	0.64953	0.0891	0.002	1876	18	1800	32	1821	17	1660	89	95.9488
Spot197.FIN2	0.10163	156.8	6.6	209.5	4.2	186.2	5.6	1.3361	18400	5.26	0.1	1.90114	0.3435	0.0067	1.95051	0.5881	0.0951	0.0018	1869	19	1895	32	1858	17	1746	77	101.391
Spot199.FIN2	0.05984	299	11	325.8	6.1	275.9	8.9	1.08963	31250	4.89	0.12	2.45399	0.3158	0.0073	2.31159	0.66089	0.0838	0.0018	1870	20	1766	36	1802	20	1617	59	94.4385
Spot201.FIN2	0.0614122	272	13	163.4	6.8	140.8	6.5	0.600735	30450	4.752	0.085	1.78872	0.3274	0.0061	1.86316	0.52737	0.0906	0.0021	1740	18	1822	29	1772	15	1690	120	104.713
Spot202.FIN2	0.0492105	390.4	7.4	236.6	4	126.9	4.2	0.606045	38000	4.508	0.082	1.81899	0.275	0.0056	2.03636	0.6918	0.0554	0.0015	1963	14	1562	28	1728	15	960	62	79.5721
Spot203.FIN2	0.0366308	536	14	342.4	5.7	258.3	7.3	0.638806	51050	4.254	0.096	2.2567	0.2763	0.0071	2.56967	0.70528	0.0763	0.0021	1860	18	1572	36	1683	19	1452	58	84.5161
Spot206.FIN2	0.0921182	193	12	126.9	7.3	114.4	6.9	0.657513	20300	5.24	0.1	1.9084	0.3293	0.0069	2.09535	0.59801	0.0948	0.0025	1922	19	1833	33	1856	17	1710	150	95.3694
Spot208.FIN2	0.0937343	176.1	6.6	190.7	6.2	182.6	6.8	1.08291	19950	5.53	0.12	2.16998	0.3252	0.0073	2.24477	0.57784	0.0966	0.0023	1975	20	1810	35	1901	19	1785	98	91.6456
Spot214.FIN2	0.0636054	292.1	8.9	233.3	4.6	203.2	7.1	0.798699	29400	4.73	0.14	2.95983	0.2987	0.0093	3.11349	0.70079	0.0861	0.0023	1849	24	1676	46	1765	25	1553	91	90.6436
Spot215.FIN2	0.0639316	297	15	258	14	252	16	0.868687	29250	4.59	0.12	2.61438	0.287	0.0083	2.89199	0.64671	0.0971	0.0026	1864	23	1622	42	1741	22	1867	84	87.0172
Spot216.FIN2	0.17363	93.3	1.9	100.8	1.4	91.7	2.2	1.08039	10770	5.26	0.11	2.09125	0.3254	0.0064	1.96681	0.48993	0.096	0.0025	1892	21	1814	31	1855	18	1740	120	95.8774
Spot217.FIN2	0.208589	120.2	4.6	131.6	5.4	81.3	3.8	1.09484	8965	3.383	0.082	2.42388	0.2152	0.0052	2.41636	0.50099	0.0631	0.0019	1836	23	1253	27	1502	19	1140	150	68.2462
Spot220.FIN2	0.0462871	386	19	371	15	273	12	0.96114	40400	4.91	0.1	2.03666	0.3126	0.0063	2.01536	0.62905	0.075	0.0016	1820	19	1752	31	1797	17	1422	52	96.2637
Spot221.FIN2	0.0647059	244.5	6.4	43.7	3	44.4	3.4	0.178732	28900	5.296	0.093	1.75604	0.3424	0.0067	1.95678	0.66687	0.1012	0.0038	1806	16	1895	32	1863	15	1490	380	104.928
Spot222.FIN2	0.0621262	275.9	8.4	236.2	6.5	200.5	6.2	0.856107	30100	5.281	0.098	1.85571	0.3234	0.0057	1.76252	0.67337	0.0869	0.0016	1914	14	1803	28	1862	15	1640	58	94.2006
Spot224.FIN2	0.0825607	254.9	6.4	30.63	0.91	19.18	0.9	0.120165	22650	3.172	0.059	1.86003	0.2596	0.0046	1.77196	0.57474	0.0672	0.0033	1389	19	1485	24	1447	14	700	430	106.911
Spot226.FIN2	0.150201	161	11	69.9	2.5	51.2	2.2	0.434161	12450	3.278	0.076	2.31849	0.2255	0.0052	2.30599	0.49607	0.0756	0.0024	1732	26	1308	27	1472	18	1090	240	75.5196
Spot228.FIN2	0.152033	108.6	4	105.2	3	94.7	3.5	0.968692	12300	5.4	0.11	2.03704	0.3444	0.0073	2.11963	0.54391	0.093	0.0023	1893	20	1902	35	1875	18	1720	130	100.475
Spot229.FIN2	0.480103	47.8	2.4	16.91	0.79	11.86	0.77	0.353766	3895	2.95	0.1	3.38983	0.2461	0.0063	2.55993	0.28945	0.077	0.0047	1451	41	1416	33	1391	26	870	880	97.5879
Spot232.FIN2	0.110651	143.7	5.8	83.6	2.9	68.8	2.5	0.581768	16900	6.12	0.12	1.96078	0.3677	0.007	1.90373	0.55233	0.0875	0.0025	1969	18	2013	33	1988	17	1560	180	102.235
Spot233.FIN2	0.0994681	169.4	6	196.7	5.4	176.6	5.8	1.16116	18800	5.33	0.093	1.74484	0.3395	0.0065	1.91458	0.56421	0.0933	0.0017	1881	18	1885	31	1873	15	1712	77	100.213
Spot234.FIN2	0.183244	188.4	6.7	50	1.5	24	1.1	0.265393	10205	1.712	0.041	2.39486	0.1687	0.0035	2.07469	0.41365	0.0516	0.0022	1055	26	1004	19	1010	15	720	280	95.1659
Spot241.FIN2	0.0410538	447	31	148.7	6.6	139.2	7.4	0.332662	45550	4.854	0.083	1.70993	0.314	0.0061	1.94268	0.64307	0.0943	0.0021	1800	16	1754	30	1793	14	1700	110	97.4444
Spot242.FIN2	0.16689	172.4	6.4	47.2	1.5	26.8	1.2	0.273782	11205	2.318	0.053	2.28645	0.204	0.004	1.96078	0.4243	0.0611	0.0025	1202	27	1193	21	1219	16	420	360	99.2512
Spot243.FIN2	0.0614122	718	21	1125	24	532	13	1.56685	30450	1.826	0.042	2.30011	0.1257	0.0031	2.46619	0.68218	0.0508	0.0011	1719	21	763	17	1055	15	957	25	44.3863
Spot244.FIN2	0.150201	119.2	5.9	119.5	5.9	108.4	5.9	1.00252	12450	5.39	0.12	2.22635	0.3306	0.007	2.11736	0.51258	0.0955	0.0023	1891	23	1845	33	1878	19	1730	180	97.5674
Spot245.FIN2	0.304808	63.4	2.3	88.6	3.4	53.8	2.3	1.39748	6135	4.62	0.15	3.24675	0.2827	0.0078	2.75911	0.39271	0.0675	0.0027	1932	33	1607	39	1745	27	1210	230	83.1781
Spot249.FIN2	0.0890476	207	14	132.9	9.4	136.4	9.3	0.642029	21000	5.176	0.094	1.81607	0.3228	0.0061	1.88971	0.58637	0.1069	0.003	1846	18	1801	29	1843	16	2030	150	97.5623
Spot251.FIN2	0.21833	89.2	4.1	70.6	1.7	60.1	1.9	0.79148	8565	4.43	0.11	2.48307	0.2815	0.007	2.48668	0.57289	0.0878	0.0028	1829	27	1594	35	1706	20	1380	200	87.1514
Spot252.FIN2	0.252192	81.7	5	97.1	4.1	90.4	4.4	1.18849	7415	4.62	0.12	2.5974	0.2809	0.0074	2.63439	0.39201	0.0997	0.0028	1922	30	1595	38	1746	22	1620	190	82.9865
Spot253.FIN2	0.135507	109.1	6.3	83.5	5.5	64.9	4.2	0.765353	13800	5.93	0.15	2.52951	0.3585	0.0086	2.39888	0.58257	0.0839	0.0032	1926	22	1971	41	1962	22	1420	260	102.336
Spot254.FIN2	0.155187	230	10	167.1	6.1	91.7	4.5	0.726522	12050	2.529	0.063	2.4911	0.1624	0.0044	2.70936	0.50752	0.0559	0.0019	1812	28	971	25	1274	18	1010	110	53.5872
Spot256.FIN2	0.144402	116.4	6.8	57.7	1.1	51.5	1.6	0.495704	12950	5.46	0.12	2.1978	0.3428	0.0076	2.21704	0.56856	0.0947	0.003	1865	21	1892	36	1888	19	1460	270	101.448
1 data not corrected for common-Pb
2 Concordance calculated as (206Pb-238U age/207Pb-206Pb age)*100
f206c = the proportion of the 206Pb ion beam that is common, calculated as (206Pb204Pbmodel/206Pb204Pb measured)* 100
where 206Pb204Pb measured = (Stacey and Kramers, 1975) 206Pb/204Pb ratio at the apparent (non-common Pb corrected) 207Pb/206Pb age
	Grains excluded from the analysis due Pb loss

## Sheet: CP17-02B
Spot	f206	U		Th		Pb		Th/U		Isotopic Ratios1									Ages (Ma)1								% conc2
	(%)	(mg.g-1)	2σ	(mg.g-1)	2σ	(mg.g-1)	2σ	calculated	206Pb/204Pb	207Pb/235U	1σ	1σ %	206Pb/238U	1σ	1σ %	Rho	208Pb/232Th	1σ	207Pb/206Pb	2σ	206Pb/238U	2σ	207Pb/235U	2σ	208Pb/232Th	2σ
Spot57.FIN2	0.14859	88.2	3	61.3	1.8	44.6	1.7	0.695011	12585	4.393	0.079	1.79832	0.3022	0.0049	1.62144	0.39863	0.0787	0.0021	1736	21	1699	24	1706	15	810	250	97.8687
Spot59.FIN2	0.052381	238	11	140.7	6	111.1	5.1	0.591176	35700	4.72	0.069	1.46186	0.3209	0.0047	1.46463	0.55631	0.0834	0.0017	1760	13	1795	23	1769	12	1400	110	101.989
Spot61.FIN2	0.0309091	405	15	543	21	413	18	1.34074	60500	4.68	0.064	1.36752	0.3161	0.0048	1.51851	0.67361	0.0811	0.0012	1771	12	1771	23	1761	11	1535	35	100
Spot62.FIN2	0.0462299	277.9	5.8	282.2	8.2	187.6	6.1	1.01547	40450	4.611	0.074	1.60486	0.3103	0.0052	1.6758	0.59462	0.0696	0.0015	1752	15	1739	26	1751	13	1303	69	99.258
Spot63.FIN2	0.0795745	153.7	5.3	141.5	6	104.6	4.4	0.920625	23500	4.79	0.07	1.46138	0.3216	0.0045	1.39925	0.50766	0.0808	0.0015	1777	15	1798	22	1781	12	1390	100	101.182
Spot64.FIN2	0.0812514	153.7	1.8	134.6	3.8	102.2	3.1	0.875732	23015	4.722	0.083	1.75773	0.322	0.0053	1.64596	0.40639	0.0804	0.0019	1763	18	1797	26	1772	15	1430	120	101.929
Spot65.FIN2	0.044898	281	10	310	11	242.8	9.3	1.1032	41650	4.713	0.064	1.35795	0.3167	0.0045	1.4209	0.57289	0.0835	0.0012	1757	12	1776	22	1767	11	1576	51	101.081
Spot66.FIN2	0.0616145	219.8	9.2	141.3	5.6	112.3	4.7	0.642857	30350	4.261	0.066	1.54893	0.295	0.0044	1.49153	0.55157	0.0856	0.0018	1722	16	1664	22	1684	13	1450	130	96.6318
Spot68.FIN2	0.0670251	195	13	148	11	111.7	8	0.758974	27900	5.11	0.095	1.8591	0.32	0.0063	1.96875	0.5021	0.0767	0.0022	1882	19	1784	31	1833	16	1230	150	94.7928
Spot69.FIN2	0.0737673	167.7	7.6	179	7.5	148	6.7	1.06738	25350	4.815	0.074	1.53686	0.3261	0.0049	1.50261	0.55664	0.0875	0.0016	1767	15	1816	24	1786	13	1587	93	102.773
Spot70.FIN2	0.105949	116.4	5.5	137.8	6.6	114	5.7	1.18385	17650	4.875	0.082	1.68205	0.3326	0.0056	1.6837	0.47415	0.0903	0.002	1774	18	1845	27	1793	14	1500	130	104.002
Spot71.FIN2	0.0558209	220.3	6.8	169.9	6.6	129.9	5.5	0.771221	33500	4.842	0.076	1.5696	0.3278	0.0054	1.64735	0.60334	0.0818	0.0016	1778	14	1829	26	1794	13	1490	96	102.868
Spot74.FIN2	0.0476555	237.7	3.9	135.6	6.6	87.4	4.7	0.570467	39240	5.58	0.071	1.2724	0.3514	0.0049	1.39442	0.60898	0.0686	0.0016	1906	13	1942	24	1909	11	1230	130	101.889
Spot75.FIN2	0.192585	84.3	2.3	59.8	1.6	42.1	1.6	0.709371	9710	3.355	0.084	2.50373	0.2508	0.0053	2.11324	0.41492	0.0763	0.0028	1593	32	1446	27	1494	19	1050	270	90.7721
Spot76.FIN2	0.0510929	242.6	8.6	234.4	6.5	209	5.5	0.9662	36600	4.955	0.082	1.65489	0.3357	0.0057	1.69794	0.57645	0.0945	0.0019	1762	16	1862	27	1807	14	1739	73	105.675
Spot77.FIN2	0.226255	56.2	2	48.8	1.4	37.6	1.2	0.868327	8265	4.75	0.1	2.10526	0.3245	0.0059	1.81818	0.45125	0.0832	0.0025	1756	22	1808	29	1770	18	1340	280	102.961
Spot78.FIN2	0.0321582	391	9.3	554.4	9	417	10	1.4179	58150	4.817	0.063	1.30787	0.3184	0.0039	1.22487	0.57244	0.0791	0.0011	1804	13	1780	19	1786	11	1477	29	98.6696
Spot79.FIN2	0.0797441	162.6	5.7	148.7	5.6	118	4.8	0.914514	23450	4.66	0.081	1.7382	0.3179	0.0056	1.76156	0.5275	0.0834	0.0017	1775	16	1774	27	1757	15	1610	100	99.9437
Spot80.FIN2	0.085	144.2	4.5	189.5	5.5	155.2	4.8	1.31415	22000	5.313	0.09	1.69396	0.3364	0.0054	1.60523	0.56714	0.0866	0.0015	1890	17	1863	26	1869	15	1568	78	98.5714
Spot82.FIN2	0.0775934	162.3	6.5	168.3	7.5	134.3	6.1	1.03697	24100	4.735	0.07	1.47835	0.325	0.0049	1.50769	0.60367	0.0853	0.0016	1755	14	1812	24	1778	12	1605	96	103.248
Spot83.FIN2	0.0552356	237.1	3.1	208.4	5.8	156.8	3.9	0.878954	33855	4.801	0.09	1.87461	0.3195	0.0057	1.78404	0.58087	0.0778	0.0017	1797	18	1784	28	1786	16	1552	80	99.2766
Spot84.FIN2	0.0873832	147	11	140.1	9	113	7.7	0.953061	21400	4.634	0.086	1.85585	0.3144	0.0052	1.65394	0.45436	0.0855	0.0019	1778	18	1761	25	1762	15	1810	160	99.0439
Spot85.FIN2	0.0704331	183.5	6.1	177.2	4.6	146.2	4.2	0.965668	26550	4.775	0.068	1.42408	0.3189	0.0045	1.4111	0.53095	0.0871	0.0015	1794	15	1787	22	1779	12	1688	79	99.6098
Spot89.FIN2	0.0582555	291.2	9.8	323	13	206.4	8.6	1.1092	32100	3.144	0.044	1.39949	0.243	0.0032	1.31687	0.52063	0.0672	0.001	1497	14	1400	17	1441	11	1308	50	93.5204
Spot90.FIN2	0.0966408	143.4	4.5	123.7	4.8	103.4	4.2	0.862622	19350	4.541	0.084	1.84981	0.3034	0.0057	1.87871	0.55449	0.0898	0.0023	1803	19	1704	28	1732	15	1720	160	94.5092
Spot91.FIN2	0.067509	194.4	8	180.8	7.9	152.2	7.2	0.930041	27700	4.681	0.067	1.43132	0.3182	0.005	1.57134	0.51941	0.0896	0.0015	1759	16	1781	24	1763	12	1761	83	101.251
Spot93.FIN2	0.123351	106.6	3.5	80.2	2.6	64.8	2.2	0.752345	15160	4.706	0.086	1.82745	0.3176	0.0056	1.76322	0.56115	0.0883	0.0021	1773	17	1773	27	1765	15	1560	200	100
Spot94.FIN2	0.0509537	259.6	4.3	177.5	2.5	141.6	2.8	0.683744	36700	4.511	0.059	1.30791	0.3093	0.0044	1.42257	0.60509	0.086	0.0015	1743	14	1733	22	1732	11	1637	70	99.4263
Spot95.FIN2	0.0464596	271.5	6.9	467	16	384	15	1.72007	40250	5.182	0.088	1.69819	0.3356	0.0061	1.81764	0.63692	0.0854	0.0014	1852	15	1864	29	1847	15	1638	44	100.648
Spot96.FIN2	0.105352	121.6	4.1	139.7	4.1	102.7	3.3	1.14885	17750	4.745	0.075	1.58061	0.3254	0.0047	1.44438	0.49617	0.08	0.0015	1758	16	1817	23	1772	14	1515	97	103.356
Spot97.FIN2	0.0966408	137.4	6.3	110.7	4.4	88.8	3.9	0.805677	19350	4.582	0.075	1.63684	0.3131	0.0052	1.66081	0.4183	0.0877	0.002	1776	19	1760	26	1741	14	1650	130	99.0991
Spot98.FIN2	0.0875878	139.4	5.6	150.2	6.4	132.5	5.8	1.07747	21350	5.233	0.082	1.56698	0.3403	0.0056	1.64561	0.566	0.0969	0.0019	1840	16	1883	27	1851	13	1850	110	102.337
Spot99.FIN2	0.0979058	133.4	5.5	133.3	5.5	103.3	4.4	0.99925	19100	4.822	0.078	1.61759	0.3209	0.0052	1.62044	0.48686	0.0854	0.0018	1814	17	1791	25	1786	13	1670	150	98.7321
Spot100.FIN2	0.265814	51	1.5	56	1.9	41	1.5	1.09804	7035	4.56	0.1	2.19298	0.3009	0.0059	1.96078	0.47686	0.0786	0.0023	1816	24	1689	29	1738	19	1470	230	93.0066
Spot102.FIN2	0.104762	125.2	5.3	124.7	4.8	74.8	3.6	0.996006	17850	4.54	0.074	1.62996	0.3066	0.005	1.63079	0.5027	0.0643	0.0014	1776	17	1718	25	1739	13	1260	120	96.7342
Spot104.FIN2	0.105949	109.9	3.5	133	3.8	117.1	3.7	1.21019	17650	5.458	0.097	1.77721	0.3459	0.0057	1.64788	0.50386	0.0927	0.0018	1877	18	1913	27	1893	15	1680	100	101.918
Spot105.FIN2	0.0838565	148.8	4.2	164.6	5.3	132.4	4.8	1.10618	22300	4.784	0.079	1.65134	0.3248	0.0048	1.47783	0.58867	0.0875	0.0017	1761	15	1811	23	1776	14	1672	82	102.839
Spot107.FIN2	0.0965909	128.7	2.1	113.8	1.7	91.9	2	0.884227	19360	4.729	0.072	1.52252	0.3205	0.0046	1.43526	0.44826	0.0857	0.0017	1764	16	1790	23	1772	13	1626	99	101.474
Spot109.FIN2	0.0752515	151.7	8	92.2	3.8	59.6	2.3	0.607779	24850	5.351	0.079	1.47636	0.3427	0.0049	1.42982	0.5061	0.0699	0.0021	1849	15	1905	23	1876	13	1450	150	103.029
Spot111.FIN2	0.0502013	253.7	4.8	207.9	4.7	125.7	3.6	0.819472	37250	4.737	0.086	1.8155	0.3195	0.0057	1.78404	0.56744	0.0637	0.0018	1774	17	1783	28	1775	16	1287	78	100.507
Spot112.FIN2	0.110324	120.7	9	321	26	239	19	2.65949	16950	4.724	0.093	1.96867	0.3139	0.0053	1.68844	0.54255	0.0817	0.0017	1801	20	1754	26	1760	16	1580	100	97.3903
Spot114.FIN2	0.113678	102.4	4.7	68.4	3.5	51.7	2.5	0.667969	16450	5.394	0.088	1.63144	0.3536	0.0057	1.61199	0.50217	0.0843	0.0025	1817	18	1949	27	1881	14	1710	240	107.265
Spot117.FIN2	0.0445238	302	15	207	16	144	11	0.68543	42000	4.558	0.082	1.79903	0.312	0.005	1.60256	0.63137	0.0739	0.0019	1726	16	1750	25	1737	15	1390	120	101.39
Spot120.FIN2	0.0602254	207.2	6.3	196.7	7.4	143.1	5.7	0.949324	31050	4.729	0.063	1.33221	0.3211	0.0045	1.40143	0.59876	0.0795	0.0014	1735	12	1794	22	1767	11	1508	75	103.401
Spot121.FIN2	0.186534	70.5	2.1	76	2.8	53.8	2	1.07801	10025	4.53	0.094	2.07506	0.3036	0.0052	1.71278	0.4595	0.0769	0.002	1784	20	1703	26	1728	17	1160	190	95.4596
Spot122.FIN2	0.0426941	297.2	7.7	387	11	262.3	7.5	1.30215	43800	4.715	0.081	1.71792	0.3261	0.0053	1.62527	0.60626	0.0707	0.0012	1711	15	1817	26	1769	14	1359	48	106.195
Spot124.FIN2	0.0433875	373	12	302	11	163.2	6.2	0.809651	43100	3.168	0.042	1.32576	0.2509	0.0032	1.27541	0.52738	0.0582	0.001	1454	14	1441	17	1448	10	1121	51	99.1059
Spot125.FIN2	0.0889417	134.6	3.5	217.3	9.3	163.1	7	1.61441	21025	5.144	0.078	1.51633	0.335	0.0049	1.46269	0.48677	0.0793	0.0015	1835	16	1862	24	1844	13	1533	66	101.471
Spot126.FIN2	0.0831111	160.7	6.4	93.9	3.5	50.8	2	0.584319	22500	4.359	0.071	1.62881	0.306	0.0046	1.50327	0.50538	0.0587	0.0017	1705	17	1719	23	1705	14	1130	150	100.821
Spot127.FIN2	0.0620232	204.2	7.7	278	10	184.9	7.8	1.36141	30150	4.774	0.07	1.46628	0.3218	0.0048	1.49161	0.49909	0.0697	0.0012	1768	15	1798	23	1782	12	1361	53	101.697
Spot128.FIN2	0.0572741	220.6	4.2	245.7	3	171.3	2.5	1.11378	32650	4.705	0.062	1.31775	0.3206	0.0041	1.27885	0.58743	0.0759	0.0013	1753	12	1790	20	1768	11	1484	50	102.111
Spot129.FIN2	0.0576271	234.1	7.6	355	14	223.5	9.1	1.51645	32450	4.366	0.073	1.67201	0.2984	0.0049	1.64209	0.57747	0.0697	0.0012	1747	17	1679	25	1708	13	1344	49	96.1076
Spot130.FIN2	0.0570992	227.1	8.9	115.3	3.3	79.2	2.4	0.507706	32750	4.633	0.058	1.25189	0.3203	0.004	1.24883	0.57605	0.0742	0.0016	1713	13	1790	20	1757	10	1500	100	104.495
Spot131.FIN2	0.066548	194.9	7.9	204.2	9.2	147.2	6.1	1.04772	28100	4.666	0.063	1.35019	0.3215	0.0045	1.39969	0.47938	0.0789	0.0015	1725	14	1794	22	1758	11	1512	76	104
Spot132.FIN2	0.0876083	156.9	3.9	84	2.6	56.8	1.9	0.535373	21345	4.584	0.065	1.41798	0.302	0.0042	1.39073	0.44465	0.0739	0.002	1798	16	1700	21	1745	12	1400	160	94.5495
Spot133.FIN2	0.070566	186.8	9	252	14	170.4	9.3	1.34904	26500	4.791	0.071	1.48195	0.3233	0.0047	1.45376	0.58878	0.0756	0.0014	1771	14	1806	23	1781	13	1471	75	101.976
Spot134.FIN2	0.0724806	179.5	7.3	177.7	7.9	117.8	5.1	0.989972	25800	4.718	0.068	1.44129	0.3222	0.0045	1.39665	0.53803	0.0738	0.0017	1749	15	1802	22	1767	12	1390	120	103.03
Spot135.FIN2	0.078903	179	10	131.5	7.3	88.1	6.1	0.734637	23700	4.555	0.096	2.10757	0.3036	0.0062	2.04216	0.52892	0.0683	0.0021	1786	22	1712	31	1736	18	1420	160	95.8567
Spot137.FIN2	0.116875	106.7	3.5	155	4.1	91.3	3.8	1.45267	16000	5.002	0.097	1.93922	0.3203	0.0063	1.96691	0.51449	0.0639	0.0016	1871	20	1791	31	1817	17	1280	100	95.7242
Spot138.FIN2	0.0641509	202.3	9	265	14	183.2	8.9	1.30994	29150	4.811	0.072	1.49657	0.3271	0.0044	1.34515	0.59719	0.0774	0.0015	1764	13	1820	22	1786	12	1501	69	103.175
Spot139.FIN2	0.0631757	210.2	5.3	343.2	8.5	232.2	5.9	1.63273	29600	4.812	0.066	1.37157	0.323	0.0043	1.33127	0.57228	0.074	0.001	1768	13	1805	21	1784	11	1414	41	102.093
Spot140.FIN2	0.0726214	171.1	4.5	225.1	5.8	170.1	3.7	1.3156	25750	5.284	0.075	1.41938	0.3437	0.0051	1.48385	0.59073	0.0826	0.0015	1849	13	1904	24	1868	12	1631	61	102.975
Spot141.FIN2	0.0852519	153.9	4	147.7	2.9	109.1	2.4	0.959714	21935	5.1	0.073	1.43137	0.3342	0.0048	1.43627	0.58402	0.0793	0.0016	1845	14	1861	23	1835	12	1509	91	100.867
Spot143.FIN2	0.0364522	429	16	423	13	222.2	8.2	0.986014	51300	4.3	0.064	1.48837	0.2812	0.0043	1.52916	0.63223	0.05271	0.00099	1820	14	1599	22	1693	12	941	42	87.8571
Spot144.FIN2	0.0734774	180.7	7.2	163.4	7.1	109.5	5	0.904261	25450	4.876	0.071	1.45611	0.3329	0.005	1.50195	0.58931	0.0728	0.0014	1757	14	1850	24	1800	12	1430	100	105.293
Spot145.FIN2	0.178265	85.7	4.4	58.7	3.9	40.7	2.7	0.684947	10490	4.27	0.09	2.10773	0.2965	0.0053	1.78752	0.48863	0.0746	0.0027	1726	21	1668	26	1676	17	1730	310	96.6396
Spot147.FIN2	0.0772727	164.3	6.2	181.9	5.9	141.9	4.9	1.10712	24200	5.308	0.081	1.526	0.3401	0.0047	1.38195	0.51766	0.0836	0.0017	1874	14	1888	22	1864	13	1574	83	100.747
Spot149.FIN2	0.0580745	235.3	6.4	255.4	5.7	157.4	4.6	1.08542	32200	4.541	0.063	1.38736	0.3101	0.0041	1.32215	0.56444	0.0679	0.0014	1741	13	1738	20	1737	12	1291	55	99.8277
Spot150.FIN2	0.0427429	322	12	450	19	327	14	1.39752	43750	4.764	0.074	1.55332	0.3065	0.0047	1.53344	0.6214	0.0774	0.0013	1849	15	1724	23	1777	13	1434	47	93.2396
Spot151.FIN2	0.0810752	161.2	4.2	168.4	3.7	125.3	2.8	1.04467	23065	5.143	0.07	1.36107	0.3314	0.0042	1.26735	0.51185	0.0788	0.0015	1847	14	1845	20	1841	11	1522	75	99.8917
Spot152.FIN2	0.101026	149.1	3.1	115.1	1.8	77.2	2.1	0.771965	18510	4.236	0.077	1.81775	0.2968	0.0052	1.75202	0.52494	0.0706	0.0018	1728	19	1675	25	1684	15	1330	120	96.9329
Spot154.FIN2	0.130541	97.3	2.3	164.9	2.9	130.5	2.8	1.69476	14325	5.274	0.082	1.5548	0.3331	0.0053	1.59111	0.4575	0.0832	0.0015	1913	16	1848	26	1864	13	1559	80	96.6022
Spot156.FIN2	0.0819457	162.8	3.6	153.7	2.5	111.2	2.5	0.944103	22820	4.704	0.07	1.4881	0.3166	0.0043	1.35818	0.5123	0.0776	0.0014	1769	15	1774	21	1766	12	1487	80	100.283
Spot157.FIN2	0.0548387	262.2	4.8	452	13	271	10	1.72387	34100	4.377	0.06	1.3708	0.2994	0.0042	1.40281	0.59079	0.0652	0.0011	1727	13	1690	21	1709	11	1242	35	97.8576
Spot159.FIN2	0.0515862	240.2	4.4	260.9	3.3	196.9	3	1.08618	36250	5.394	0.074	1.37189	0.343	0.0045	1.31195	0.5675	0.0814	0.0013	1863	12	1898	22	1884	12	1512	49	101.879
Spot160.FIN2	0.0636379	235.7	3	386.2	6.6	99.1	3.7	1.63852	29385	4.71	0.071	1.50743	0.2801	0.004	1.42806	0.33496	0.0264	0.001	1960	14	1590	20	1759	12	481	35	81.1224
Spot161.FIN2	0.071374	205.8	4.3	184	6.5	121.5	5.2	0.894072	26200	4.119	0.071	1.72372	0.2942	0.0049	1.66553	0.55611	0.0673	0.0015	1657	20	1660	24	1655	14	1411	84	100.181
Spot163.FIN2	0.0603226	222.4	8.6	468	20	237.6	9.5	2.10432	31000	4.511	0.063	1.39659	0.3106	0.0044	1.41661	0.57551	0.0576	0.0011	1697	14	1741	22	1731	11	1114	38	102.593
Spot164.FIN2	0.0282264	467	13	114.7	5.8	80	4.2	0.24561	66250	5.104	0.081	1.58699	0.3319	0.0054	1.627	0.66991	0.0728	0.0021	1815	13	1847	26	1835	14	1350	170	101.763
Spot165.FIN2	0.298246	45.5	1.6	47.9	2	32.6	1.5	1.05275	6270	4.7	0.1	2.12766	0.3084	0.0056	1.81582	0.3696	0.0746	0.0026	1803	26	1729	28	1757	18	1170	320	95.8957
Spot166.FIN2	0.0652705	196.8	7.6	309	14	225	10	1.57012	28650	5.16	0.082	1.58915	0.3387	0.005	1.47623	0.56316	0.0771	0.0015	1775	16	1877	24	1845	14	1486	60	105.746
Spot168.FIN2	0.0444709	285.9	7.8	556	17	401	12	1.94474	42050	4.908	0.063	1.28362	0.3239	0.0041	1.26582	0.54696	0.0768	0.0011	1772	14	1806	20	1802	11	1435	33	101.919
Spot169.FIN2	0.0341865	369.3	7.3	446	12	327.4	8.7	1.20769	54700	4.678	0.065	1.38948	0.3226	0.0043	1.33292	0.6253	0.0748	0.0011	1694	13	1801	21	1762	12	1447	36	106.316
Spot171.FIN2	0.050134	250.4	8.7	320.1	9.5	229.8	7.3	1.27835	37300	4.935	0.068	1.37791	0.3295	0.0044	1.33536	0.61432	0.0778	0.0012	1751	13	1834	21	1804	12	1426	54	104.74
Spot172.FIN2	0.0914425	141.9	7.6	98.8	6.1	46.8	3.3	0.696265	20450	4.971	0.099	1.99155	0.3222	0.006	1.8622	0.44717	0.0489	0.0023	1816	21	1803	29	1813	17	1000	210	99.2841
Spot173.FIN2	0.104469	130.2	5.6	81.6	3.2	54.3	2.3	0.626728	17900	4.631	0.097	2.09458	0.3135	0.0061	1.94577	0.49962	0.0703	0.0023	1760	21	1758	30	1751	17	1150	220	99.8864
Spot174.FIN2	0.0743539	161.3	9.3	265	22	203	16	1.6429	25150	5.311	0.08	1.50631	0.3455	0.0053	1.53401	0.54395	0.0834	0.0016	1816	15	1910	25	1867	13	1538	82	105.176
Spot175.FIN2	0.0712381	191	8.8	211.8	9.9	141.6	6.5	1.1089	26250	4.724	0.067	1.41829	0.3075	0.0046	1.49593	0.59693	0.0744	0.0015	1799	14	1727	23	1770	12	1366	78	95.9978
Spot176.FIN2	0.081128	153.4	4.4	233.1	7.1	173.1	5.6	1.51956	23050	5.315	0.077	1.44873	0.3262	0.0048	1.47149	0.60888	0.0794	0.0013	1882	14	1817	23	1868	12	1542	62	96.5462
Spot177.FIN2	0.163319	81.8	4.1	109.9	6	72.8	3.9	1.34352	11450	4.573	0.091	1.98994	0.3112	0.0056	1.79949	0.419	0.0724	0.0018	1720	21	1747	27	1740	16	1300	180	101.57
Spot178.FIN2	0.0403888	314	12	406	16	286	12	1.29299	46300	4.853	0.071	1.46301	0.3221	0.0049	1.52127	0.59216	0.073	0.0013	1748	14	1799	24	1789	12	1403	42	102.918
Spot179.FIN2	0.440518	30.6	1.3	22.2	0.66	14.82	0.67	0.72549	4245	4.51	0.12	2.66075	0.3097	0.0074	2.38941	0.27046	0.0761	0.0036	1773	34	1742	36	1729	23	970	570	98.2516
Spot180.FIN2	0.085977	134.8	5.3	150.4	4.8	104.1	3.8	1.11573	21750	5.594	0.087	1.55524	0.3534	0.0052	1.47142	0.56162	0.0729	0.0014	1845	15	1951	25	1912	13	1270	88	105.745
Spot181.FIN2	0.0740594	164.1	7	201.1	5.5	144.6	4	1.22547	25250	5.053	0.075	1.48427	0.3335	0.005	1.49925	0.58213	0.0779	0.0014	1762	14	1850	24	1824	12	1535	60	104.994
Spot182.FIN2	0.0599359	241.2	9.6	329	13	139.8	6.8	1.36401	31200	4.127	0.072	1.74461	0.2741	0.0046	1.67822	0.5853	0.045	0.001	1782	17	1560	23	1660	14	849	49	87.5421
Spot183.FIN2	0.0496021	246.9	9.2	315	11	237.2	8	1.27582	37700	5.33	0.069	1.29456	0.3394	0.0043	1.26694	0.62848	0.0806	0.0013	1847	12	1882	21	1874	11	1535	52	101.895
Spot184.FIN2	0.025067	502	23	327	22	138.6	9.5	0.651394	74600	5.366	0.085	1.58405	0.339	0.0062	1.82891	0.68513	0.0485	0.0024	1847	14	1877	30	1880	13	842	69	101.624
Spot185.FIN2	0.050134	265.6	5.8	349	7.1	237.9	5.9	1.31401	37300	4.882	0.072	1.47481	0.3236	0.0048	1.48331	0.52411	0.0754	0.0014	1759	15	1805	23	1796	13	1400	47	102.615
Spot186.FIN2	0.118957	111.1	3.8	110.1	3.3	80.2	2.5	0.990999	15720	4.729	0.076	1.60711	0.319	0.0049	1.53605	0.44458	0.079	0.0019	1770	18	1786	24	1771	13	1480	110	100.904
Spot187.FIN2	0.0477041	280.3	8.5	403	13	291.8	8	1.43775	39200	4.771	0.07	1.4672	0.3225	0.0047	1.45736	0.64043	0.0794	0.0013	1736	13	1802	23	1776	12	1526	41	103.802
Spot190.FIN2	0.122663	110.3	3.5	84.5	2.3	62.6	2	0.766092	15245	4.845	0.08	1.65119	0.3187	0.0051	1.60025	0.5097	0.0784	0.0019	1822	19	1781	25	1792	14	1170	160	97.7497
Spot192.FIN2	0.0634975	202.5	7.8	235	11	178.6	7.5	1.16049	29450	5.39	0.077	1.42857	0.3423	0.0049	1.43149	0.62202	0.0828	0.0015	1850	13	1900	23	1878	12	1556	71	102.703
Spot193.FIN2	0.0278896	704	20	43.2	2.8	28.2	1.1	0.0613636	67050	2.744	0.038	1.38484	0.2255	0.0032	1.41907	0.63178	0.0748	0.0046	1399	13	1312	17	1339	10	170	490	93.7813
Spot194.FIN2	0.0363107	382	15	511	21	366	14	1.3377	51500	4.688	0.061	1.30119	0.3249	0.0044	1.35426	0.60289	0.0778	0.0012	1713	13	1816	21	1763	11	1452	39	106.013
Spot195.FIN2	0.0731898	200.3	7.8	304	13	225.7	8.7	1.51772	25550	4.579	0.069	1.50688	0.3121	0.0047	1.50593	0.57466	0.079	0.0015	1749	15	1747	23	1745	12	1534	58	99.8856
Spot196.FIN2	0.0505405	298.1	8.2	330.3	8.3	226.8	6.5	1.10802	37000	4.545	0.072	1.58416	0.3109	0.0051	1.6404	0.63286	0.0701	0.0013	1744	14	1742	25	1738	13	1361	52	99.8853
Spot197.FIN2	0.081128	184.2	8.8	200	7.1	136.5	5.4	1.08578	23050	4.712	0.071	1.50679	0.3106	0.0047	1.5132	0.5557	0.0715	0.0013	1798	17	1742	23	1767	13	1135	78	96.8854
Spot198.FIN2	0.0939698	164.1	3.4	268.2	7.5	150.1	3.3	1.63437	19900	4.829	0.096	1.98799	0.31	0.0058	1.87097	0.55897	0.057	0.0018	1880	19	1736	29	1790	17	1077	64	92.3404
Spot199.FIN2	0.071785	236	6.4	278.9	8.2	170	5.1	1.18178	26050	3.789	0.067	1.76828	0.278	0.0046	1.65468	0.51421	0.0616	0.0014	1626	17	1584	23	1590	14	1134	63	97.417
Spot200.FIN2	0.0626151	227	3.9	301.9	3.8	214.7	3.8	1.32996	29865	4.72	0.061	1.29237	0.3195	0.0041	1.28326	0.53324	0.0764	0.0012	1761	13	1787	20	1771	11	1475	47	101.476
Spot202.FIN2	0.102298	149.6	4.5	164.4	4.4	117	3.3	1.09893	18280	4.526	0.067	1.48034	0.3091	0.0042	1.35878	0.43969	0.076	0.0015	1766	15	1737	21	1732	12	1420	88	98.3579
Spot203.FIN2	0.0761711	193.5	5	195.6	7.3	140	4.7	1.01085	24550	4.388	0.066	1.5041	0.3015	0.0048	1.59204	0.52472	0.0759	0.0016	1739	17	1695	24	1706	12	1487	79	97.4698
Spot204.FIN2	0.116511	126.1	4.8	173.4	7.5	130.7	5.4	1.3751	16050	4.752	0.084	1.76768	0.3195	0.0052	1.62754	0.36816	0.0809	0.0018	1805	21	1785	25	1773	15	1460	100	98.892
Spot205.FIN2	0.219871	65.7	1.8	114.3	2.9	87.5	2.4	1.73973	8505	4.903	0.097	1.97838	0.3214	0.0056	1.74238	0.3805	0.0804	0.0018	1838	24	1796	27	1792	17	1620	110	97.7149
Spot206.FIN2	0.0543605	278	10	335	15	167.4	5.5	1.20504	34400	4.689	0.084	1.79143	0.3165	0.0054	1.70616	0.59467	0.0512	0.0017	1768	16	1774	27	1767	14	877	58	100.339
Spot207.FIN2	0.0937343	141.2	8.1	224	14	184	10	1.5864	19950	5.473	0.09	1.64444	0.349	0.0054	1.54728	0.48029	0.091	0.0021	1884	16	1927	26	1893	14	1730	120	102.282
Spot208.FIN2	0.0503365	293	13	306	14	215.4	9.7	1.04437	37150	4.816	0.067	1.3912	0.3216	0.0047	1.46144	0.62025	0.0767	0.0013	1783	12	1794	23	1785	12	1458	59	100.617
Spot209.FIN2	0.159488	91.6	2.8	86.7	2.9	60.9	2.2	0.946507	11725	4.569	0.078	1.70716	0.3087	0.0049	1.5873	0.39932	0.0757	0.002	1765	19	1734	24	1745	14	1250	180	98.2436
Spot210.FIN2	0.172112	78	2.3	133.9	4.4	99.1	3.4	1.71667	10865	5.247	0.096	1.82962	0.3397	0.0057	1.67795	0.48468	0.0799	0.0017	1850	18	1886	27	1856	16	1440	100	101.946
Spot212.FIN2	0.0574501	243	12	338	15	257	11	1.39095	32550	5.04	0.071	1.40873	0.3285	0.0045	1.36986	0.58637	0.0817	0.0013	1822	13	1832	22	1825	12	1558	46	100.549
Spot214.FIN2	0.0894737	171.3	4.8	203.5	5	120	3.5	1.18797	20900	4.458	0.069	1.54778	0.296	0.0042	1.41892	0.5411	0.0633	0.0011	1781	14	1669	21	1721	13	1255	62	93.7114
Spot217.FIN2	0.0946835	155.8	5.9	136.7	6.1	95.4	4	0.877407	19750	4.559	0.07	1.53542	0.3058	0.0046	1.50425	0.53173	0.0773	0.0017	1750	15	1724	22	1740	13	1350	120	98.5143
Spot218.FIN2	0.0479487	297	10	435	26	182	5.4	1.46465	39000	4.896	0.09	1.83824	0.3221	0.0061	1.89382	0.59979	0.0484	0.0022	1774	17	1795	29	1797	16	879	59	101.184
Spot219.FIN2	0.0669052	211.1	8.4	182	11	132	7.6	0.862151	27950	4.597	0.066	1.43572	0.312	0.0042	1.34615	0.48473	0.0792	0.0017	1726	14	1749	20	1746	12	1533	88	101.333
Spot220.FIN2	0.125926	101.6	4.1	126.6	5.9	96.1	4.5	1.24606	14850	5.653	0.091	1.60976	0.3485	0.0053	1.5208	0.51772	0.0839	0.0018	1905	17	1926	25	1924	14	1600	120	101.102
Spot221.FIN2	0.0380081	364	11	496	10	328.9	7	1.36264	49200	4.863	0.061	1.25437	0.3201	0.0041	1.28085	0.63811	0.0724	0.001	1763	10	1789	20	1797	11	1376	31	101.475
Spot222.FIN2	0.0555721	228.6	5.3	283.4	5.9	215.4	4.4	1.23972	33650	5.521	0.076	1.37656	0.3469	0.0051	1.47016	0.64169	0.0837	0.0014	1864	12	1921	24	1906	12	1592	52	103.058
Spot223.FIN2	0.0446727	300.5	4.3	371	3	268.6	3.9	1.23461	41860	4.767	0.06	1.25865	0.3235	0.0042	1.2983	0.64207	0.0785	0.0011	1716	11	1805	20	1777	10	1510	37	105.186
Spot224.FIN2	0.0389583	380	13	447	15	290.8	9	1.17632	48000	4.655	0.066	1.41783	0.309	0.0045	1.45631	0.63557	0.0717	0.0014	1771	13	1733	22	1757	12	1357	42	97.8543
Spot225.FIN2	0.071374	185.2	5.3	233.6	6.9	170.6	4.9	1.26134	26200	5.281	0.069	1.30657	0.3329	0.0046	1.3818	0.57941	0.0801	0.0014	1855	13	1855	22	1864	11	1552	58	100
Spot226.FIN2	0.072791	183.9	3.8	193.7	3.1	138.4	2.7	1.05329	25690	5.341	0.077	1.44168	0.3336	0.005	1.4988	0.54632	0.0758	0.0014	1856	14	1857	24	1871	12	1422	75	100.054
Spot227.FIN2	0.200214	81.4	3.6	56.2	1.6	30.4	1	0.690418	9340	4.097	0.091	2.22114	0.2869	0.0054	1.88219	0.47038	0.0594	0.002	1697	23	1624	27	1646	18	930	250	95.6983
Spot228.FIN2	0.103144	137.5	3.2	149.1	2.6	101.5	2.1	1.08436	18130	4.763	0.077	1.61663	0.3158	0.0047	1.48828	0.52847	0.0753	0.0015	1771	17	1767	23	1776	13	1312	90	99.7741
Spot229.FIN2	0.0538129	267	12	240	10	155.4	6.2	0.898876	34750	4.796	0.064	1.33445	0.3205	0.0043	1.34165	0.55843	0.0716	0.0013	1752	13	1791	21	1784	11	1306	65	102.226
Spot230.FIN2	0.0416018	339	13	418	14	278.9	8.5	1.23304	44950	5.042	0.061	1.20984	0.327	0.0044	1.34557	0.5978	0.0743	0.0011	1819	12	1822	22	1825	10	1405	37	100.165
Spot231.FIN2	0.0968661	150.1	3.8	184.5	3.9	109.2	2.7	1.22918	19305	4.707	0.071	1.50839	0.3162	0.0046	1.45478	0.45768	0.0641	0.0012	1754	16	1768	23	1771	13	1209	71	100.798
Spot232.FIN2	0.0531325	275	3.8	391.5	3.5	262.6	3.8	1.42364	35195	4.682	0.059	1.26015	0.3159	0.0041	1.29788	0.57757	0.0728	0.001	1756	13	1766	20	1765	10	1398	34	100.569
Spot233.FIN2	0.0288136	517	15	274	11	159.2	5.1	0.529981	64900	4.647	0.054	1.16204	0.3139	0.0038	1.21058	0.58235	0.0664	0.0015	1729	12	1759	19	1757	9.7	1270	61	101.735
1 data not corrected for common-Pb
2 Concordance calculated as (206Pb-238U age/207Pb-206Pb age)*100
f206c = the proportion of the 206Pb ion beam that is common, calculated as (206Pb204Pbmodel/206Pb204Pb measured)* 100
where 206Pb204Pb measured = (Stacey and Kramers, 1975) 206Pb/204Pb ratio at the apparent (non-common Pb corrected) 207Pb/206Pb age

## Sheet: MRB-17-2(2)
Spot	f206	U		Th		Pb		Th/U		Isotopic Ratios1									Ages (Ma)1								% conc2
	(%)	(mg.g-1)	2σ	(mg.g-1)	2σ	(mg.g-1)	2σ	calculated	206Pb/204Pb	207Pb/235U	1σ	1σ %	206Pb/238U	1σ	1σ %	Rho	208Pb/232Th	1σ	207Pb/206Pb	2σ	206Pb/238U	2σ	207Pb/235U	2σ	208Pb/232Th	2σ
Spot57.FIN2	0.729045	31.91	0.85	33.8	1.1	18.5	1.2	1.05923	2565	4.52	0.18	3.9823	0.309	0.011	3.55987	0.35871	0.0541	0.0038	1759	49	1722	53	1750	35	750	470	97.8965
Spot58.FIN2	0.195198	115.4	4.1	199.9	6.9	105.7	3.6	1.73224	9580	5.16	0.1	1.93798	0.3266	0.0056	1.71464	0.43264	0.0569	0.0015	1796	21	1820	27	1844	17	1067	80	101.336
Spot59.FIN2	0.213959	101.5	2.6	146.6	5.1	81.5	3.5	1.44433	8740	5.23	0.12	2.29446	0.3233	0.0072	2.22703	0.50722	0.0608	0.002	1816	26	1802	35	1856	21	1100	130	99.2291
Spot60.FIN2	0.422599	49.48	0.99	80.8	1.7	45.3	1.6	1.63298	4425	5.36	0.12	2.23881	0.3437	0.0076	2.21123	0.28437	0.0585	0.0021	1820	30	1893	36	1875	20	900	170	104.011
Spot61.FIN2	0.159556	141	4	356	12	182	6.1	2.52482	11720	5.063	0.089	1.75785	0.3274	0.0051	1.55773	0.48125	0.0533	0.0012	1764	19	1822	25	1822	15	1042	45	103.288
Spot62.FIN2	0.146667	135.5	6	260	12	152.3	7.5	1.91882	12750	6.14	0.15	2.443	0.3747	0.0079	2.10835	0.46158	0.0588	0.0017	1873	25	2048	37	1999	21	1149	80	109.343
Spot63.FIN2	0.3692	56.8	1.7	116.4	3.6	63.6	2.2	2.0493	5065	5.73	0.15	2.6178	0.3479	0.0075	2.15579	0.43261	0.0584	0.0019	1880	27	1921	36	1935	22	1070	130	102.181
Spot64.FIN2	0.128567	174	5.9	355	14	195.2	7.1	2.04023	14545	5.193	0.092	1.77162	0.3358	0.0058	1.72722	0.47638	0.0557	0.0015	1742	21	1861	28	1850	15	1115	51	106.831
Spot65.FIN2	0.312448	71.4	2.9	196.3	8.1	112.4	4.5	2.7493	5985	5.31	0.13	2.44821	0.3385	0.0066	1.94978	0.37787	0.0599	0.0016	1830	26	1876	32	1866	21	1164	78	102.514
Spot66.FIN2	0.354167	59.8	2.4	121.9	4.7	72.3	2.7	2.03846	5280	5.9	0.14	2.37288	0.3606	0.0081	2.24626	0.4348	0.0642	0.0022	1917	27	1970	38	1956	20	1100	130	102.765
Spot67.FIN2	0.0982917	218.8	5.5	178.7	4.4	96.6	3.2	0.816728	19025	5.81	0.11	1.89329	0.3543	0.0058	1.63703	0.50819	0.0535	0.0017	1862	18	1957	27	1950	17	990	92	105.102
Spot68.FIN2	0.286371	73.5	2.5	122.2	4.5	71.2	2.8	1.66259	6530	5.86	0.13	2.21843	0.3584	0.007	1.95312	0.43927	0.063	0.0021	1890	25	1976	33	1950	19	1080	140	104.55
Spot70.FIN2	0.287471	76.2	2	193.6	4.1	109.4	3	2.54068	6505	5.82	0.14	2.4055	0.3513	0.0074	2.10646	0.51659	0.0579	0.0015	1909	24	1930	35	1938	20	1158	71	101.1
Spot71.FIN2	0.256868	89.1	3.3	246.1	9.3	146.6	6.2	2.76207	7280	5.19	0.13	2.50482	0.3343	0.0069	2.06401	0.4111	0.061	0.0016	1779	25	1855	33	1840	21	1195	73	104.272
Spot72.FIN2	0.152653	161.2	9.2	504	30	266	17	3.12655	12250	4.97	0.12	2.41449	0.3244	0.0072	2.21948	0.49608	0.0496	0.0013	1777	27	1804	35	1807	21	1001	66	101.519
Spot73.FIN2	0.186813	122.1	3.1	301.9	7.5	167.4	5	2.47256	10010	5.77	0.14	2.42634	0.3437	0.0072	2.09485	0.42853	0.0542	0.0014	1937	25	1897	35	1939	21	1067	60	97.935
Spot74.FIN2	0.0740594	318	17	720	44	384	23	2.26415	25250	5.204	0.09	1.72944	0.3406	0.0057	1.67352	0.54703	0.0549	0.0013	1767	18	1888	27	1853	15	1077	52	106.848
Spot75.FIN2	0.416018	54.4	1.4	131.1	2.5	77.4	2.1	2.40993	4495	5.33	0.14	2.62664	0.3441	0.0083	2.41209	0.41109	0.0615	0.0019	1855	31	1896	39	1866	23	1236	95	102.21
Spot76.FIN2	0.293794	81.3	3.7	193	11	108.3	5.7	2.37392	6365	5.24	0.13	2.48092	0.3378	0.0077	2.27946	0.4517	0.0583	0.0019	1821	28	1868	37	1858	21	1115	95	102.581
Spot77.FIN2	0.458333	52.5	2.9	114.3	7.7	61.2	4	2.17714	4080	5.22	0.15	2.87356	0.3461	0.0083	2.39815	0.36224	0.0592	0.0025	1800	33	1901	39	1850	24	1000	220	105.611
Spot78.FIN2	0.194792	133.1	8	229	14	145	10	1.72051	9600	5.04	0.12	2.38095	0.3253	0.007	2.15186	0.38581	0.0604	0.0017	1813	27	1810	34	1822	21	1213	86	99.8345
Spot79.FIN2	0.329515	72.1	2.8	111.2	3.7	67.7	2.7	1.5423	5675	6.01	0.14	2.32945	0.3551	0.0076	2.14024	0.45737	0.0637	0.0021	1963	24	1959	36	1967	20	1290	140	99.7962
Spot80.FIN2	0.68	35.16	0.91	90.6	2.3	52.9	2.3	2.57679	2750	5.89	0.25	4.24448	0.359	0.014	3.89972	0.48373	0.055	0.0027	1925	43	1969	63	1938	38	1090	190	102.286
Spot81.FIN2	0.271014	93.7	4	151	5.4	80.9	3.2	1.61153	6900	5.01	0.11	2.19561	0.3253	0.0059	1.81371	0.40728	0.0565	0.0018	1799	24	1812	28	1820	19	980	110	100.723
Spot82.FIN2	0.17156	145	4.1	236	7.6	134	4.1	1.62759	10900	5.13	0.096	1.87135	0.3329	0.0055	1.65215	0.49185	0.0607	0.0017	1775	20	1852	26	1836	15	1145	74	104.338
Spot83.FIN2	0.295185	85.5	1.7	182.8	5	101.1	3.1	2.13801	6335	5.04	0.12	2.38095	0.3295	0.0064	1.94234	0.42356	0.058	0.0017	1795	26	1837	31	1820	19	1136	86	102.34
Spot84.FIN2	0.411894	60.6	1.2	53.8	2.1	29.8	1.7	0.887789	4540	5.78	0.16	2.76817	0.3485	0.0083	2.38164	0.46349	0.0562	0.0033	1929	28	1929	39	1948	23	1250	330	100
Spot85.FIN2	0.30137	86.3	2.4	145.1	3.7	80.2	2.6	1.68134	6205	5.01	0.11	2.19561	0.3275	0.0061	1.8626	0.38327	0.0576	0.0018	1779	25	1824	29	1817	19	1318	97	102.53
Spot86.FIN2	0.38837	71.9	2.8	196.8	7.6	103.2	4.2	2.73713	4815	4.83	0.12	2.48447	0.3083	0.0063	2.04346	0.36249	0.055	0.0016	1833	27	1732	31	1775	21	1130	92	94.4899
Spot87.FIN2	0.43237	63.5	2.3	102	3.3	58.7	2.4	1.6063	4325	5.07	0.13	2.5641	0.3285	0.0068	2.07002	0.42601	0.0588	0.0021	1832	27	1825	33	1824	21	1260	140	99.6179
Spot88.FIN2	0.285714	93.6	2.9	172.7	3.1	100.3	2.5	1.84509	6545	5.15	0.11	2.13592	0.333	0.0065	1.95195	0.44863	0.0603	0.0018	1804	24	1844	31	1837	19	1196	87	102.217
Spot89.FIN2	0.184327	136.5	5.2	246	11	148.5	7.3	1.8022	10145	5.836	0.098	1.67923	0.3538	0.0059	1.66761	0.42461	0.0623	0.0017	1915	19	1949	28	1951	14	1233	81	101.775
Spot90.FIN2	0.224895	115.2	4.9	211.8	7.1	123.3	4.3	1.83854	8315	5.7	0.12	2.10526	0.3562	0.0067	1.88097	0.49432	0.0618	0.0017	1874	21	1965	32	1931	18	1241	85	104.856
Spot91.FIN2	0.184691	139.4	5.6	283	13	173	7.6	2.03013	10125	5.66	0.11	1.94346	0.3498	0.006	1.71527	0.46329	0.0653	0.0017	1886	21	1935	28	1919	17	1295	71	102.598
Spot92.FIN2	0.157806	164	9.4	213	11	136.2	7.3	1.29878	11850	6.01	0.12	1.99667	0.367	0.0065	1.77112	0.56077	0.0655	0.0021	1898	18	2010	30	1969	17	1380	110	105.901
Spot93.FIN2	0.174115	159.8	6.1	509	22	290	13	3.18523	10740	5.139	0.099	1.92644	0.3321	0.006	1.80668	0.41903	0.0603	0.0013	1798	22	1855	29	1841	16	1220	43	103.17
Spot94.FIN2	0.305556	88.2	4	150.9	8.7	89.6	5.1	1.71088	6120	5.27	0.13	2.46679	0.3446	0.0066	1.91526	0.33958	0.0642	0.0022	1800	28	1905	31	1867	20	1290	170	105.833
Spot95.FIN2	0.671454	43	2.6	94.6	7.2	53.3	3.6	2.2	2785	5.15	0.18	3.49515	0.3286	0.0099	3.01278	0.3878	0.0636	0.0029	1910	41	1832	49	1827	29	1180	260	95.9162
Spot96.FIN2	0.540462	52.9	2.2	87.2	3	52.3	2.3	1.64839	3460	5.27	0.16	3.03605	0.3261	0.0082	2.51457	0.42908	0.0623	0.0025	1904	32	1820	40	1853	26	1180	190	95.5882
Spot97.FIN2	0.22503	117.7	3.5	138.8	4.5	95.5	3.4	1.17927	8310	6.61	0.2	3.02572	0.3658	0.008	2.18699	0.36505	0.0681	0.0036	2032	40	2003	37	2043	26	1080	150	98.5728
Spot98.FIN2	0.795745	36	0.99	111.3	2.1	61.8	2	3.09167	2350	5.08	0.17	3.34646	0.331	0.0091	2.74924	0.34343	0.058	0.002	1824	39	1838	43	1826	29	1120	130	100.768
Spot99.FIN2	0.49668	59.9	3.3	64.7	2.9	35.8	1.9	1.08013	3765	4.99	0.15	3.00601	0.3213	0.0085	2.6455	0.3561	0.0588	0.003	1843	34	1786	41	1800	24	1300	290	96.9072
Spot100.FIN2	0.475222	59.3	2.3	80.8	3.7	49.6	2.6	1.36256	3935	5.29	0.15	2.83554	0.3353	0.0078	2.32627	0.34562	0.0645	0.0029	1844	31	1858	38	1858	25	1450	250	100.759
Spot101.FIN2	0.343119	84.4	2.9	132	4.3	76.1	3	1.56398	5450	5.1	0.12	2.35294	0.3309	0.0064	1.93412	0.41904	0.0615	0.0021	1807	26	1836	31	1827	19	1240	130	101.605
Spot102.FIN2	0.205044	141	4.4	258.6	8.2	143.9	4.7	1.83404	9120	5.07	0.1	1.97239	0.3322	0.0061	1.83624	0.45569	0.0607	0.0016	1772	22	1845	29	1832	17	1226	72	104.12
Spot103.FIN2	0.303571	89.2	3.2	89.2	4	51.2	2.6	1	6160	5.85	0.13	2.22222	0.3549	0.0074	2.08509	0.36565	0.063	0.0027	1925	25	1953	35	1949	19	1090	270	101.455
Spot105.FIN2	0.329806	88.9	4.9	199	13	114.1	7.5	2.23847	5670	5.46	0.19	3.47985	0.351	0.01	2.849	0.48112	0.0585	0.0027	1834	33	1936	48	1890	29	1350	150	105.562
Spot106.FIN2	0.333333	85.9	3.7	144.8	6.1	81.2	3.5	1.68568	5610	5.33	0.14	2.62664	0.3429	0.007	2.04141	0.3759	0.0628	0.0023	1814	28	1900	33	1875	21	1180	130	104.741
Spot107.FIN2	0.44898	68.6	2.2	132.9	4	67.3	2.6	1.93732	4165	5.07	0.16	3.15582	0.319	0.009	2.82132	0.39806	0.0505	0.002	1867	37	1779	43	1821	27	910	120	95.2866
Spot108.FIN2	0.210586	146.4	2.4	151.7	5.6	85.5	3.5	1.0362	8880	4.998	0.093	1.86074	0.3143	0.0057	1.81355	0.48169	0.0588	0.0019	1848	20	1759	28	1816	16	1140	130	95.184
Spot109.FIN2	0.2992	113.9	7.7	206	13	114	6.8	1.8086	6250	4.69	0.13	2.77186	0.2997	0.0078	2.6026	0.44487	0.0555	0.0023	1863	31	1686	39	1770	24	1160	120	90.4992
Spot111.FIN2	0.670251	46.4	1.5	88.8	2.8	50.9	2.3	1.91379	2790	5.02	0.19	3.78486	0.3217	0.0099	3.0774	0.27865	0.0585	0.0025	1870	40	1788	48	1800	31	850	210	95.615
Spot112.FIN2	0.449519	66.7	2.2	119.9	3.4	69.9	2.6	1.7976	4160	4.92	0.13	2.64228	0.322	0.0075	2.32919	0.32099	0.0617	0.0021	1777	32	1799	36	1795	22	1210	130	101.238
Spot113.FIN2	0.151417	185.8	8.4	184.3	9	101.6	4.9	0.991927	12350	5.8	0.11	1.89655	0.3532	0.0064	1.812	0.5159	0.0607	0.0021	1885	20	1943	30	1948	16	1170	130	103.077
Spot114.FIN2	0.530496	54.5	1.8	72.2	2.3	39.9	1.7	1.32477	3525	5.75	0.16	2.78261	0.3429	0.0085	2.47886	0.39479	0.0597	0.0028	1963	31	1894	40	1927	24	1050	240	96.485
Spot115.FIN2	0.253216	109.9	2.8	234	6.5	141.2	4.1	2.12921	7385	5.71	0.12	2.10158	0.3471	0.0064	1.84385	0.39653	0.0628	0.0017	1887	24	1919	30	1925	19	1175	76	101.696
Spot116.FIN2	0.315878	94.1	5.3	217	15	117.5	7.9	2.30606	5920	5.08	0.13	2.55906	0.3278	0.007	2.13545	0.43733	0.0591	0.0022	1804	28	1825	34	1828	21	1170	130	101.164
Spot117.FIN2	0.213227	134.2	3.2	84.3	2.4	49.7	2	0.628167	8770	5.53	0.1	1.80832	0.3425	0.0062	1.81022	0.4226	0.0609	0.0025	1844	21	1900	29	1900	16	1050	180	103.037
Spot118.FIN2	0.244604	125	4	181.5	5.9	98	3.3	1.452	7645	5.09	0.11	2.1611	0.3268	0.0064	1.95838	0.46901	0.0577	0.0019	1792	22	1818	31	1825	18	990	110	101.451
Spot119.FIN2	0.394099	83.1	2.7	153.4	5.6	82.8	3.7	1.84597	4745	4.66	0.14	3.00429	0.3045	0.0078	2.56158	0.38234	0.0514	0.002	1775	32	1718	39	1752	24	1030	110	96.7887
Spot120.FIN2	0.273993	104.1	4.2	214.5	9.6	132.9	6.1	2.06052	6825	5.59	0.14	2.50447	0.3421	0.0073	2.13388	0.32466	0.0681	0.0021	1890	28	1890	35	1912	21	1170	100	100
Spot122.FIN2	0.214696	143	4.2	319	10	166.7	5.6	2.23077	8710	4.93	0.12	2.43408	0.3247	0.0076	2.34062	0.43511	0.0497	0.0017	1743	29	1805	37	1813	21	941	67	103.557
Spot123.FIN2	0.690037	41.8	1.6	66.2	2.5	38.7	1.9	1.58373	2710	5.87	0.18	3.06644	0.3468	0.0096	2.76817	0.40145	0.063	0.003	2013	39	1913	45	1947	26	410	320	95.0323
Spot124.FIN2	0.262825	110.2	4	88.9	3.9	56.7	2.6	0.806715	7115	5.65	0.13	2.30088	0.3428	0.0076	2.21704	0.42324	0.0644	0.0028	1910	24	1900	37	1916	20	890	220	99.4764
Spot126.FIN2	0.257221	122.1	3.7	215.7	6.6	118	4	1.76658	7270	4.85	0.12	2.47423	0.3201	0.0069	2.15558	0.37021	0.0543	0.0016	1780	27	1785	34	1786	20	1024	80	100.281
Spot127.FIN2	0.382413	80.6	2.6	228.7	5.9	122.8	4	2.83747	4890	4.98	0.13	2.61044	0.3225	0.0079	2.44961	0.44096	0.0537	0.0016	1799	32	1800	38	1810	22	979	81	100.056
Spot128.FIN2	0.374	79.4	4.1	180	9.2	109	5.6	2.267	5000	5.32	0.13	2.44361	0.3369	0.0074	2.1965	0.36625	0.0631	0.0022	1838	27	1867	35	1865	20	1270	130	101.578
Spot129.FIN2	0.406964	75.9	3.9	173	11	100.3	6.4	2.27931	4595	5.25	0.14	2.66667	0.3264	0.0074	2.26716	0.45493	0.059	0.0024	1868	28	1821	36	1849	23	1150	190	97.4839
Spot130.FIN2	0.519444	56.8	1.6	102.7	3.2	58.2	2.2	1.8081	3600	5.19	0.14	2.6975	0.3354	0.0077	2.29577	0.22052	0.0607	0.0025	1835	32	1863	37	1842	24	1000	190	101.526
Spot131.FIN2	0.522346	59.6	2.5	104.9	4.4	58	2.8	1.76007	3580	5.02	0.15	2.98805	0.3239	0.0081	2.50077	0.37164	0.0578	0.0024	1802	35	1812	39	1809	25	830	190	100.555
Spot134.FIN2	0.148413	214	11	205	9.9	120.1	6.8	0.957944	12600	4.612	0.098	2.12489	0.3186	0.0066	2.07156	0.52817	0.0579	0.0018	1654	23	1779	32	1749	18	1136	99	107.557
Spot135.FIN2	0.261905	104.5	5.1	106.9	4.9	71.4	3.5	1.02297	7140	6.02	0.13	2.15947	0.3706	0.0076	2.05073	0.40401	0.0692	0.0027	1880	23	2029	36	1974	19	1200	170	107.926
Spot136.FIN2	0.327783	94	4.2	166.8	7.6	101.2	4.7	1.77447	5705	5.34	0.14	2.62172	0.333	0.0072	2.16216	0.46547	0.071	0.0034	1828	30	1845	34	1862	21	1040	210	100.93
Spot137.FIN2	0.390805	79.9	2.7	133.6	4	77.3	2.6	1.67209	4785	5.08	0.13	2.55906	0.3304	0.0072	2.17918	0.41533	0.0613	0.0023	1783	29	1839	34	1820	22	1020	140	103.141
Spot138.FIN2	0.471627	62.4	2.9	77.3	3.8	47.1	2.5	1.23878	3965	5.81	0.17	2.92599	0.3444	0.0085	2.46806	0.49131	0.0637	0.003	1944	32	1906	40	1941	26	950	280	98.0453
Spot139.FIN2	0.245729	125.1	3.1	215.2	4.4	133.8	3.7	1.72022	7610	5.26	0.11	2.09125	0.3333	0.0066	1.9802	0.36964	0.0637	0.0017	1831	25	1850	32	1860	19	1161	76	101.038
Spot141.FIN2	0.57716	55	2.9	102.5	5.4	63.9	3.5	1.86364	3240	5.27	0.17	3.22581	0.3259	0.0094	2.88432	0.41417	0.066	0.0029	1872	34	1805	44	1848	27	1150	260	96.4209
Spot143.FIN2	0.191109	172.2	8.3	241.5	6.1	132.7	4.4	1.40244	9785	4.568	0.088	1.92644	0.3128	0.0054	1.72634	0.44191	0.0582	0.0018	1650	23	1751	27	1742	16	1090	81	106.121
Spot144.FIN2	0.184965	171.6	4	368	10	209.6	6.6	2.14452	10110	5.09	0.11	2.1611	0.3308	0.0067	2.02539	0.37818	0.0539	0.0015	1736	26	1840	33	1832	19	1072	57	105.991
Spot145.FIN2	0.775934	53	1.4	83.3	2.8	37.8	2	1.5717	2410	3.84	0.14	3.64583	0.2509	0.0072	2.86967	0.30469	0.045	0.0024	1837	42	1439	37	1589	29	710	210	78.3342
Spot146.FIN2	0.243173	131.8	5.9	211.7	9.7	120.7	5.7	1.60622	7690	5.05	0.11	2.17822	0.3319	0.0061	1.8379	0.32962	0.0584	0.0018	1770	27	1843	29	1821	19	1090	110	104.124
Spot147.FIN2	0.422599	71	1.8	117.8	3.2	74.2	3.2	1.65915	4425	5.16	0.17	3.29457	0.3294	0.0099	3.00546	0.49495	0.0693	0.003	1795	36	1836	48	1838	27	1180	190	102.284
Spot149.FIN2	0.351834	87.1	1.7	142.1	3	84.9	2.9	1.63146	5315	5.19	0.13	2.50482	0.3442	0.0071	2.06275	0.40127	0.0626	0.0022	1759	28	1904	34	1837	21	1000	140	108.243
Spot150.FIN2	0.737673	79.4	3.2	39	1.7	13.1	1	0.491184	2535	2.023	0.08	3.95452	0.1842	0.0053	2.87731	0.3916	0.0356	0.0033	1175	49	1080	28	1100	26	-110	530	91.9149
Spot151.FIN2	0.62963	50.2	1.3	116.7	4.9	63.6	3	2.3247	2970	5.05	0.15	2.9703	0.3289	0.0089	2.70599	0.32549	0.0566	0.0023	1835	37	1817	43	1807	24	680	210	99.0191
Spot152.FIN2	0.367748	89.7	2.2	235.6	8.9	140.2	5.5	2.62653	5085	5.19	0.12	2.31214	0.3196	0.0068	2.12766	0.37797	0.0613	0.0018	1844	30	1784	33	1843	20	1112	78	96.7462
Spot153.FIN2	0.211538	155	6.4	200.4	8.1	118	4.7	1.2929	8840	5.14	0.11	2.14008	0.3309	0.0064	1.93412	0.46119	0.0604	0.002	1779	23	1838	30	1839	18	1120	110	103.316
Spot154.FIN2	0.196946	171.7	7.3	224.8	9.1	123.2	5.3	1.30926	9495	5.01	0.1	1.99601	0.32	0.0056	1.75	0.43379	0.056	0.0018	1782	23	1785	28	1812	17	995	97	100.168
Spot155.FIN2	0.232298	140.1	7	180.3	8.3	102.1	4.6	1.28694	8050	4.96	0.1	2.01613	0.3246	0.006	1.84843	0.38184	0.0583	0.002	1756	25	1810	29	1808	17	1000	120	103.075
Spot156.FIN2	0.827434	39.2	1.6	79.5	3	47.4	2.3	2.02806	2260	5.16	0.19	3.68217	0.331	0.01	3.02115	0.43798	0.0586	0.0027	1876	40	1829	49	1821	32	940	240	97.4947
Spot157.FIN2	0.196842	160.4	6	217.5	9	133.1	5.5	1.35599	9500	5.15	0.1	1.94175	0.3361	0.0058	1.72568	0.4313	0.0608	0.0018	1748	20	1864	28	1839	16	1086	92	106.636
Spot158.FIN2	0.20282	160	2.9	264.4	5.4	156.5	4.3	1.6525	9220	5	0.11	2.2	0.3288	0.0062	1.88564	0.44543	0.0562	0.0015	1744	22	1831	30	1821	18	1024	62	104.989
Spot159.FIN2	0.407407	80.5	3.4	144.1	6.5	90.8	4.5	1.79006	4590	5.23	0.17	3.25048	0.3365	0.0093	2.76374	0.42792	0.0588	0.0024	1837	35	1862	44	1851	27	980	170	101.361
Spot160.FIN2	0.319385	100.7	4.1	129	5.1	75.8	3.9	1.28103	5855	5.68	0.16	2.8169	0.349	0.0091	2.60745	0.46189	0.0535	0.0023	1878	31	1924	43	1937	23	1020	150	102.449
Spot161.FIN2	0.286371	110.2	4.1	300.3	8.7	168.9	5.6	2.72505	6530	5.12	0.11	2.14844	0.3371	0.0063	1.86888	0.3341	0.0567	0.0014	1749	24	1877	30	1839	18	1057	60	107.318
Spot162.FIN2	0.513032	63.8	2.8	167.2	8.2	94	4.7	2.62069	3645	5.22	0.15	2.87356	0.3338	0.0088	2.63631	0.27732	0.0582	0.0021	1857	33	1850	42	1845	24	1110	150	99.623
Spot163.FIN2	0.234925	133.3	5.3	295	10	169.6	6.1	2.21305	7960	5.22	0.11	2.10728	0.3405	0.0066	1.93833	0.51163	0.059	0.0016	1759	23	1884	32	1849	18	1078	74	107.106
Spot164.FIN2	0.308836	108.3	4.6	301	11	173.5	6.9	2.77932	6055	5.07	0.15	2.95858	0.3318	0.0088	2.6522	0.36099	0.0527	0.0018	1771	31	1843	42	1821	26	951	67	104.065
Spot166.FIN2	0.624374	51.6	2.2	91.9	3.4	54.6	2.4	1.78101	2995	5.17	0.17	3.2882	0.3299	0.0088	2.66747	0.37871	0.0607	0.0028	1810	37	1824	43	1827	27	950	210	100.773
Spot167.FIN2	0.390805	82.7	3.2	158.3	6.1	93.6	3.9	1.91415	4785	5.16	0.13	2.51938	0.3346	0.008	2.39091	0.47178	0.0621	0.0022	1779	30	1848	38	1836	22	1130	130	103.879
Spot168.FIN2	0.203815	148.7	6.4	194	8.2	118.5	5.3	1.30464	9175	5.91	0.12	2.03046	0.3511	0.0063	1.79436	0.47375	0.0611	0.0019	1900	21	1938	30	1960	17	1199	87	102
Spot169.FIN2	0.36346	90	3.2	201.8	9.6	112.4	5.7	2.24222	5145	4.99	0.11	2.20441	0.3193	0.0069	2.16098	0.3389	0.055	0.0016	1788	27	1780	33	1818	19	1080	88	99.5526
Spot170.FIN2	0.200644	157	3.1	314.5	6	182.2	5.2	2.00318	9320	5.19	0.12	2.31214	0.3351	0.0072	2.14861	0.48864	0.0559	0.0016	1762	23	1854	35	1843	19	1036	53	105.221
Spot171.FIN2	0.451691	66.4	3.2	111.7	6	77.3	4.5	1.68223	4140	5.99	0.17	2.83806	0.3644	0.0089	2.44237	0.41104	0.069	0.0029	1859	33	1990	42	1961	25	1070	220	107.047
Spot172.FIN2	0.270036	125.6	6.6	222	12	123.5	6.5	1.76752	6925	4.78	0.12	2.51046	0.3155	0.0067	2.12361	0.33495	0.059	0.002	1748	28	1764	33	1775	21	1120	120	100.915
Spot173.FIN2	0.363107	83.5	3.8	107.8	4	66.8	2.8	1.29102	5150	5.38	0.14	2.60223	0.3442	0.0076	2.20802	0.44204	0.0635	0.0023	1786	29	1907	36	1869	22	970	170	106.775
Spot174.FIN2	0.218203	134.8	3.1	303.3	5.3	193.1	4.3	2.25	8570	5.87	0.11	1.87394	0.352	0.0065	1.84659	0.4492	0.0649	0.0015	1886	22	1941	30	1950	17	1208	51	102.916
Spot175.FIN2	0.431373	72.1	2.3	127.1	4	74.9	3	1.76283	4335	5.78	0.15	2.59516	0.342	0.0087	2.54386	0.44127	0.0593	0.0022	1964	28	1883	41	1937	22	1020	130	95.8758
Spot176.FIN2	0.395349	74.7	3.3	120.6	5	72.5	3.4	1.61446	4730	5.85	0.15	2.5641	0.3599	0.0085	2.36177	0.42485	0.0623	0.0025	1874	28	1970	40	1942	22	1270	140	105.123
Spot177.FIN2	0.326923	98.5	4.8	159.1	6.5	96.3	4.4	1.61523	5720	5.19	0.13	2.50482	0.3323	0.0072	2.16672	0.43811	0.0592	0.0019	1793	26	1844	34	1854	21	1070	110	102.844
Spot178.FIN2	0.413717	78.5	1.7	177.8	2.7	105.5	2.9	2.26497	4520	4.99	0.13	2.60521	0.3209	0.0073	2.27485	0.40121	0.0609	0.0019	1790	28	1792	36	1808	21	1156	74	100.112
Spot179.FIN2	0.206744	158.1	5.5	382	12	230	7.8	2.41619	9045	4.99	0.11	2.20441	0.3226	0.0063	1.95288	0.44834	0.0614	0.0015	1757	23	1801	31	1819	18	1126	52	102.504
Spot180.FIN2	0.310116	101.1	3	183.1	4.4	112.2	4.2	1.81108	6030	5.53	0.16	2.89331	0.3453	0.009	2.60643	0.48794	0.0557	0.0021	1817	32	1905	43	1902	25	1058	98	104.843
Spot181.FIN2	0.136	241	15	519	32	282	17	2.15353	13750	5.06	0.1	1.97628	0.3254	0.006	1.84388	0.40934	0.0585	0.0018	1759	22	1815	29	1828	17	1127	77	103.184
Spot182.FIN2	0.353163	88.6	2.3	175.3	3.9	100.7	3.4	1.97856	5295	5.25	0.12	2.28571	0.3226	0.0067	2.07688	0.33786	0.0587	0.0019	1860	28	1796	32	1856	20	967	90	96.5591
Spot183.FIN2	0.477041	64.7	2.6	95.8	3.5	57.4	2.5	1.48068	3920	5.42	0.15	2.76753	0.3462	0.0084	2.42634	0.34979	0.0626	0.0025	1822	33	1902	40	1871	24	860	200	104.391
Spot184.FIN2	0.456098	70.8	3.5	156.2	7.3	88.3	4.4	2.20621	4100	5.13	0.14	2.72904	0.3263	0.0076	2.32914	0.35644	0.0592	0.0022	1811	31	1820	36	1837	24	1000	160	100.497
Spot185.FIN2	0.3021	102.5	4.7	177.3	7	109.8	4.3	1.72976	6190	5.28	0.12	2.27273	0.3339	0.0069	2.06649	0.46982	0.0652	0.0023	1781	25	1855	33	1857	19	1070	130	104.155
Spot187.FIN2	0.239437	129.8	4.7	279	13	157.4	7.6	2.14946	7810	5.64	0.14	2.48227	0.3444	0.0072	2.09059	0.36456	0.0551	0.002	1845	26	1904	34	1921	21	1014	87	103.198
Spot188.FIN2	0.269452	120.3	3.5	260.3	5.9	142.1	3.9	2.16376	6940	5.08	0.11	2.16535	0.3266	0.0063	1.92897	0.39137	0.055	0.0015	1749	26	1814	30	1829	17	1020	63	103.716
Spot189.FIN2	0.207778	163	9.6	283	17	145.2	9	1.7362	9000	5.06	0.15	2.96443	0.3163	0.0073	2.30794	0.3185	0.0474	0.0017	1777	31	1772	35	1831	24	800	98	99.7186
Spot190.FIN2	0.691312	42.8	1.6	79	2.7	47.9	2.7	1.84579	2705	5.26	0.21	3.9924	0.333	0.013	3.9039	0.45403	0.0709	0.0041	1821	48	1849	60	1854	33	1120	280	101.538
Spot191.FIN2	0.218713	151	10	185.1	7	107.8	5.2	1.22583	8550	5.21	0.15	2.87908	0.3311	0.0075	2.26518	0.41383	0.053	0.0021	1797	29	1838	36	1856	24	900	110	102.282
Spot192.FIN2	0.226529	168.4	6.2	282.4	8	139.6	4.1	1.67696	8255	4.132	0.089	2.15392	0.2809	0.005	1.77999	0.45013	0.0531	0.0017	1646	24	1593	25	1653	17	877	87	96.7801
Spot193.FIN2	0.505405	63.6	2.6	153.6	4	89.2	3.2	2.41509	3700	4.94	0.16	3.23887	0.3239	0.0081	2.50077	0.30919	0.0591	0.002	1740	34	1812	38	1789	28	890	130	104.138
Spot194.FIN2	0.414175	75.5	2.1	143.3	3.7	89	2.9	1.89801	4515	5.35	0.13	2.42991	0.3382	0.0074	2.18805	0.41099	0.0621	0.0021	1787	27	1868	36	1874	21	1160	100	104.533
Spot195.FIN2	0.353163	93.1	2.2	266.3	5.9	154.8	4.3	2.86037	5295	5.16	0.12	2.32558	0.3232	0.0065	2.01114	0.42945	0.0584	0.0016	1801	27	1797	32	1842	20	1042	61	99.7779
Spot196.FIN2	0.293333	101.8	4.2	171.7	5.1	110.5	4.8	1.68664	6375	6.1	0.14	2.29508	0.3536	0.0077	2.1776	0.47049	0.0618	0.002	1927	27	1949	36	1982	20	1030	110	101.142
Spot197.FIN2	0.252532	131.2	4.8	315	11	179.2	7.5	2.40091	7405	5.19	0.14	2.6975	0.3309	0.0076	2.29677	0.50354	0.0521	0.0017	1772	28	1836	37	1853	23	990	66	103.612
Spot198.FIN2	0.352166	84.1	4.6	100.3	4.8	62.6	3.2	1.19263	5310	6.35	0.17	2.67717	0.3717	0.0084	2.25989	0.46333	0.0644	0.0027	1925	28	2028	39	2015	22	1060	180	105.351
Spot199.FIN2	0.834821	38.44	0.76	45	1.2	25.1	1.2	1.17066	2240	5.27	0.17	3.22581	0.3279	0.0092	2.80573	0.35588	0.0611	0.0035	1858	39	1819	45	1866	28	640	340	97.901
Spot200.FIN2	0.422122	81.2	2.4	165.4	5.9	98.5	3.8	2.03695	4430	5.11	0.14	2.73973	0.3144	0.0072	2.29008	0.28528	0.0623	0.0023	1829	31	1757	35	1828	22	960	150	96.0634
Spot201.FIN2	0.340309	96.9	3	165.7	5.6	98.4	3.8	1.71001	5495	5.09	0.13	2.55403	0.325	0.0071	2.18462	0.46953	0.0602	0.002	1749	27	1809	34	1831	22	1020	150	103.431
Spot202.FIN2	0.528249	57.7	1.5	132.1	5	81.8	4.1	2.28943	3540	5.32	0.19	3.57143	0.341	0.011	3.22581	0.30723	0.0677	0.0027	1750	45	1880	53	1870	31	1160	180	107.429
Spot203.FIN2	0.48072	68.9	2.7	111.4	4.2	64.2	2.8	1.61684	3890	5.02	0.13	2.58964	0.3296	0.0077	2.33617	0.31778	0.0592	0.0024	1695	32	1825	37	1807	22	930	190	107.67
Spot205.FIN2	0.454435	75.1	3.4	141.1	7.9	78.5	5	1.87883	4115	5.1	0.19	3.72549	0.3247	0.0094	2.89498	0.36042	0.052	0.0026	1751	43	1817	45	1827	30	900	180	103.769
Spot206.FIN2	0.814815	37.5	1.6	33.1	1.6	21.6	1.6	0.882667	2295	5.93	0.25	4.21585	0.352	0.014	3.97727	0.38888	0.0729	0.0062	1999	51	1923	64	1954	38	610	760	96.1981
Spot207.FIN2	0.459459	67.9	3.4	90.5	5.4	53.2	3.4	1.33284	4070	6.04	0.17	2.81457	0.3488	0.0086	2.4656	0.34604	0.0638	0.0034	1941	31	1925	40	1967	25	980	370	99.1757
Spot208.FIN2	0.259003	126.9	3.7	314.8	6.4	192.8	5.2	2.48069	7220	5.23	0.11	2.10325	0.3296	0.0065	1.97209	0.45563	0.0613	0.0015	1739	25	1838	31	1851	18	1161	59	105.693
Spot209.FIN2	0.117241	265	12	335	12	231.6	8.4	1.26415	15950	5.93	0.1	1.68634	0.3535	0.0055	1.55587	0.50177	0.0688	0.0016	1850	18	1948	26	1964	15	1333	60	105.297
Spot210.FIN2	0.534286	59.3	1.8	78.2	1.9	54.7	2.2	1.31872	3500	5.82	0.17	2.92096	0.3521	0.0092	2.61289	0.3196	0.0666	0.0029	1871	34	1939	43	1940	26	920	230	103.634
Spot211.FIN2	0.321859	100	3.3	178.9	4.8	118.3	4.2	1.789	5810	5.5	0.15	2.72727	0.3392	0.0074	2.1816	0.4066	0.0655	0.002	1791	30	1880	36	1896	23	1140	110	104.969
Spot213.FIN2	0.231436	135.5	4.1	242.8	5.6	162	5	1.79188	8080	5.88	0.12	2.04082	0.3535	0.0063	1.78218	0.42088	0.0662	0.0019	1843	21	1947	29	1950	17	1254	75	105.643
Spot214.FIN2	0.71785	48.8	2.5	105.2	6.6	65.1	4	2.15574	2605	5.31	0.19	3.57815	0.329	0.01	3.03951	0.54606	0.0612	0.0027	1807	40	1809	48	1835	31	890	240	100.111
Spot215.FIN2	0.156945	222.2	7.9	599	24	355	15	2.69577	11915	4.997	0.096	1.92115	0.3151	0.0058	1.84069	0.50406	0.0596	0.0015	1743	20	1765	28	1817	16	1071	48	101.262
Spot216.FIN2	0.322692	106.9	3.2	300	6.7	189.3	5.1	2.80636	5795	4.97	0.11	2.21328	0.316	0.0068	2.1519	0.47193	0.0605	0.0015	1749	26	1761	33	1809	19	1134	57	100.686
Spot217.FIN2	0.29472	118.5	5.2	245	14	155.7	8.2	2.06751	6345	5.21	0.12	2.30326	0.3255	0.0068	2.08909	0.41605	0.0652	0.0022	1765	25	1811	33	1849	20	1224	96	102.606
Spot218.FIN2	1.24252	36.3	1.3	65.4	2.3	31.7	1.9	1.80165	1505	3.34	0.16	4.79042	0.2534	0.0087	3.43331	0.36873	0.0482	0.0029	1505	55	1445	44	1432	38	820	280	96.0133
Spot219.FIN2	0.514443	67.7	2.7	168	7.2	102.2	5	2.48154	3635	4.95	0.15	3.0303	0.3201	0.0081	2.53046	0.31687	0.0603	0.0023	1729	34	1790	39	1802	26	1190	160	103.528
Spot220.FIN2	0.445238	74.7	1.7	142.1	2.7	84.6	2.5	1.90228	4200	5.15	0.14	2.71845	0.3344	0.0083	2.48206	0.37338	0.0597	0.0021	1738	30	1850	40	1845	23	1000	120	106.444
Spot221.FIN2	0.111976	310	15	494	23	311	15	1.59355	16700	5.09	0.12	2.35756	0.3264	0.0071	2.17525	0.60916	0.0549	0.0015	1724	22	1818	34	1836	19	1002	51	105.452
Spot222.FIN2	0.198093	181.9	3.4	485	13	289.4	9.6	2.6663	9440	5.17	0.13	2.51451	0.319	0.0075	2.3511	0.40882	0.0527	0.0014	1795	32	1780	37	1841	22	975	47	99.1643
Spot223.FIN2	0.518724	61.9	3.1	74.4	4.2	47.9	3	1.20194	3605	5.97	0.2	3.35008	0.3464	0.0093	2.68476	0.45676	0.0684	0.0039	1958	37	1904	44	1947	28	1250	340	97.2421
Spot224.FIN2	0.468085	69.6	2.7	119.8	4.5	76.8	3.3	1.72126	3995	5.84	0.16	2.73973	0.3484	0.0086	2.46843	0.42384	0.0642	0.0026	1878	28	1928	41	1935	24	1260	140	102.662
Spot225.FIN2	0.168925	200.2	6.3	551	22	345	13	2.75225	11070	5.35	0.11	2.05607	0.3297	0.0066	2.00182	0.48777	0.0609	0.0015	1781	22	1841	32	1876	18	1119	48	103.369
Spot226.FIN2	0.279313	121	4.4	71.7	4.7	45.8	3.5	0.592562	6695	5	0.12	2.4	0.326	0.007	2.14724	0.35538	0.0597	0.0034	1738	25	1815	34	1814	21	1240	350	104.43
Spot228.FIN2	0.443128	78.1	3.2	136.1	5.2	81.3	3.5	1.74264	4220	5.05	0.13	2.57426	0.3187	0.0076	2.38469	0.40423	0.0594	0.0023	1788	29	1775	37	1827	22	1060	140	99.2729
Spot229.FIN2	0.338768	97.8	4.8	243	16	165	11	2.48466	5520	5.22	0.14	2.68199	0.3381	0.0082	2.42532	0.43437	0.0644	0.002	1761	30	1866	39	1847	23	1234	96	105.963
Spot230.FIN2	0.286151	121.9	5.4	170.4	8.1	107.6	5.4	1.39787	6535	5.31	0.13	2.44821	0.324	0.0068	2.09877	0.3822	0.0655	0.0024	1821	28	1807	33	1866	21	1220	140	99.2312
Spot231.FIN2	0.155316	219.4	7.9	358	12	227.2	8.3	1.63172	12040	5.091	0.094	1.8464	0.3273	0.0059	1.80263	0.51885	0.0643	0.0017	1720	19	1824	29	1833	15	1177	57	106.047
Spot232.FIN2	0.233458	132.5	3.7	209.1	5.6	152.8	4.9	1.57811	8010	6.07	0.12	1.97694	0.3653	0.007	1.91623	0.49336	0.0728	0.002	1857	22	2007	33	1985	18	1350	88	108.078
Spot233.FIN2	1.02747	32.5	1.2	112.6	3.5	72.8	2.9	3.46462	1820	5.36	0.22	4.10448	0.335	0.011	3.28358	0.34282	0.0657	0.0023	1866	47	1853	50	1857	35	1100	160	99.3033
Spot234.FIN2	0.231579	148.7	5.9	219.6	8.9	133.8	5.6	1.4768	8075	5.16	0.11	2.13178	0.3279	0.0067	2.04331	0.48929	0.0636	0.0021	1737	23	1818	32	1834	18	1247	96	104.663
Spot235.FIN2	0.218586	153.7	6.6	366	14	238.6	9.1	2.38126	8555	5.29	0.11	2.0794	0.3415	0.0065	1.90337	0.37058	0.067	0.0016	1734	24	1890	31	1867	17	1280	54	108.997
Spot236.FIN2	0.35927	95.9	4.1	200.9	8.9	122.4	5.8	2.09489	5205	5.17	0.13	2.51451	0.3232	0.0069	2.1349	0.40613	0.0636	0.0022	1775	25	1794	33	1845	21	1290	130	101.07
Spot237.FIN2	0.282264	119	5.4	204.2	9.4	132.4	6.3	1.71597	6625	5.23	0.13	2.48566	0.335	0.0067	2	0.39943	0.0648	0.002	1767	29	1855	32	1851	21	1220	100	104.98
Spot238.FIN2	0.589905	57.1	1.9	123.5	3.5	79.5	3	2.16287	3170	5.3	0.15	2.83019	0.3349	0.0084	2.50821	0.41687	0.0662	0.0024	1791	32	1859	40	1857	25	1100	130	103.797
Spot239.FIN2	0.275202	117.1	3.2	162.8	3.7	107.3	3.3	1.39026	6795	5.94	0.13	2.18855	0.3534	0.0071	2.00905	0.4168	0.0657	0.0021	1877	24	1944	33	1963	19	1140	110	103.57
Spot240.FIN2	0.751004	45.2	2.2	50.9	3.2	32.4	2.5	1.12611	2490	5.25	0.24	4.57143	0.33	0.013	3.93939	0.3845	0.0751	0.0057	1840	48	1818	61	1842	38	730	570	98.8043
Spot241.FIN2	0.193582	176.8	6.8	402	18	261	11	2.27376	9660	5.08	0.11	2.16535	0.3299	0.0063	1.90967	0.52059	0.0657	0.0019	1717	21	1832	30	1826	18	1243	64	106.698
Spot242.FIN2	0.404762	84.5	2.3	114	2.8	74.2	2.7	1.34911	4620	5.27	0.14	2.65655	0.3307	0.0078	2.35863	0.4732	0.0655	0.0024	1799	28	1833	38	1856	23	1280	140	101.89
Spot243.FIN2	0.184418	187.2	7.9	249.1	8.2	156	6	1.33066	10140	4.97	0.11	2.21328	0.32	0.0065	2.03125	0.46519	0.0626	0.0019	1724	23	1784	32	1803	18	1135	82	103.48
Spot244.FIN2	0.33274	106.8	5.2	197.2	8.7	120.8	5.6	1.84644	5620	5.15	0.13	2.52427	0.3266	0.007	2.14329	0.36714	0.063	0.0021	1766	28	1817	34	1833	21	1250	110	102.888
Spot245.FIN2	0.169307	209.1	9.1	472	21	284	14	2.25729	11045	5.26	0.1	1.90114	0.3182	0.0055	1.72847	0.44837	0.061	0.0015	1811	21	1776	27	1855	17	1169	60	98.0674
Spot246.FIN2	0.262088	136.6	5.5	130.9	5.3	85	4.1	0.958272	7135	4.86	0.11	2.26337	0.3115	0.0063	2.02247	0.43463	0.0641	0.0023	1721	24	1751	31	1787	19	990	160	101.743
Spot247.FIN2	0.516575	66.2	2.3	85.9	2.4	55.5	2.4	1.29758	3620	5.35	0.15	2.80374	0.3382	0.0085	2.51331	0.42484	0.0638	0.0027	1796	32	1866	41	1868	24	950	200	103.898
Spot248.FIN2	0.293564	116.4	3.9	151.9	6.8	107.7	4.8	1.30498	6370	5.3	0.12	2.26415	0.3398	0.0069	2.03061	0.43806	0.0749	0.0027	1749	24	1874	33	1869	18	1310	140	107.147
Spot249.FIN2	0.180764	203.4	9.1	273	12	171.4	8.7	1.34218	10345	4.885	0.098	2.00614	0.3112	0.0058	1.86375	0.48824	0.0622	0.0017	1762	21	1740	28	1793	17	1165	73	98.7514
Spot250.FIN2	0.148413	241	10	311	12	213.2	8.5	1.29046	12600	4.99	0.11	2.20441	0.3266	0.007	2.14329	0.53909	0.0655	0.0019	1701	24	1816	34	1818	19	1219	73	106.761
Spot251.FIN2	0.208473	156	6.4	312	13	230	10	2	8970	5.45	0.12	2.20183	0.348	0.0066	1.89655	0.45138	0.0746	0.0019	1748	22	1925	32	1894	18	1391	74	110.126
Spot252.FIN2	0.183694	173	3.8	291.6	7.6	189.8	5.7	1.68555	10180	6.01	0.11	1.83028	0.357	0.0062	1.73669	0.52036	0.0667	0.0017	1856	20	1968	29	1976	16	1287	60	106.034
Spot253.FIN2	0.0981627	319	13	268	10	191.7	7.2	0.840125	19050	6.34	0.1	1.57729	0.3766	0.0057	1.51354	0.50736	0.0736	0.0021	1856	16	2056	27	2020	14	1321	81	110.776
Spot254.FIN2	0.516575	63.3	2.4	104.1	4.7	74.8	3.7	1.64455	3620	6.08	0.17	2.79605	0.3639	0.0093	2.55565	0.42845	0.0746	0.0029	1895	32	1986	43	1982	25	1430	190	104.802
Spot255.FIN2	0.461159	71.3	2.5	84.3	2.7	61.7	2.6	1.18233	4055	6.06	0.17	2.80528	0.3621	0.0093	2.56835	0.46339	0.0763	0.0031	1878	30	1979	44	1966	25	1380	220	105.378
Spot256.FIN2	0.620232	49.9	1.8	60.4	1.8	58.3	2.3	1.21042	3015	6.8	0.22	3.23529	0.386	0.011	2.84974	0.43763	0.0989	0.0044	2019	33	2087	51	2083	29	1350	280	103.368
1 data not corrected for common-Pb
2 Concordance calculated as (206Pb-238U age/207Pb-206Pb age)*100
f206c = the proportion of the 206Pb ion beam that is common, calculated as (206Pb204Pbmodel/206Pb204Pb measured)* 100
where 206Pb204Pb measured = (Stacey and Kramers, 1975) 206Pb/204Pb ratio at the apparent (non-common Pb corrected) 207Pb/206Pb age
	Grains excluded from the analysis due Pb loss

## Sheet: NR 123
Spot	f206	U		Th		Pb		Th/U		Isotopic Ratios1									Ages (Ma)1								% conc2
	(%)	(mg.g-1)	2σ	(mg.g-1)	2σ	(mg.g-1)	2σ	calculated	206Pb/204Pb	207Pb/235U	1σ	1σ %	206Pb/238U	1σ	1σ %	Rho	208Pb/232Th	1σ	207Pb/206Pb	2σ	206Pb/238U	2σ	207Pb/235U	2σ	208Pb/232Th	2σ
Spot57.FIN2	0.259362	104.9	1.6	131.1	3.1	118.5	3.9	1.24976	7210	5.9	0.13	2.20339	0.3748	0.0074	1.97439	0.5179	0.0921	0.0028	1849	23	2043	34	1953	19	1810	120	110.492
Spot58.FIN2	0.450602	70	1.5	88.7	1.7	63.4	2	1.26714	4150	5.58	0.15	2.68817	0.3334	0.0076	2.27954	0.50514	0.0745	0.0027	1940	26	1852	37	1902	22	1250	190	95.4639
Spot59.FIN2	0.22476	204.8	7.9	38.8	1.1	20.8	1.2	0.189453	8320	2.718	0.059	2.17071	0.2272	0.0041	1.80458	0.33322	0.0575	0.0034	1297	27	1321	22	1331	16	1130	490	101.85
Spot60.FIN2	0.36346	89.7	3.6	213.6	9.9	152.7	7.5	2.38127	5145	5.1	0.13	2.54902	0.3246	0.0075	2.31054	0.41205	0.0721	0.002	1860	28	1818	36	1826	21	1410	100	97.7419
Spot61.FIN2	0.123026	264	15	313	18	215	12	1.18561	15200	4.86	0.09	1.85185	0.3251	0.0055	1.69179	0.40098	0.0719	0.0018	1732	21	1814	27	1794	16	1383	84	104.734
Spot63.FIN2	0.129861	263.9	8	366.6	6.7	209.5	7.2	1.38916	14400	4.71	0.12	2.54777	0.3127	0.0078	2.4944	0.58896	0.0527	0.0016	1726	23	1748	38	1763	21	1013	58	101.275
Spot64.FIN2	0.203926	156.9	6.2	158.2	7	122.2	5.4	1.00829	9170	5.17	0.11	2.12766	0.3324	0.0066	1.98556	0.49679	0.0781	0.0024	1824	22	1848	32	1835	17	1390	130	101.316
Spot65.FIN2	0.574501	58.2	2.5	125.8	5.1	90.4	4.2	2.16151	3255	5.6	0.2	3.57143	0.333	0.01	3.003	0.27617	0.0704	0.0026	1986	47	1849	49	1903	31	1340	160	93.1017
Spot66.FIN2	0.178265	182.5	5.6	214.4	6.8	155.5	4.9	1.17479	10490	5.287	0.096	1.81577	0.3306	0.0057	1.72414	0.46189	0.0728	0.002	1834	19	1842	28	1864	15	1363	86	100.436
Spot67.FIN2	0.231722	150	3.7	177.4	4	122.8	3.6	1.18267	8070	5.07	0.1	1.97239	0.3119	0.0057	1.82751	0.42021	0.0698	0.002	1881	21	1748	28	1826	17	1347	88	92.9293
Spot68.FIN2	0.120026	247.8	7.3	537	12	421	11	2.16707	15580	5.89	0.1	1.69779	0.3609	0.0058	1.60709	0.5527	0.0767	0.0015	1850	17	1984	27	1955	15	1442	40	107.243
Spot69.FIN2	0.447368	105.1	4.1	90.8	3.8	46.9	2.9	0.863939	4180	2.979	0.091	3.05472	0.2342	0.0059	2.51921	0.37917	0.0513	0.0024	1452	35	1353	30	1385	22	780	260	93.1818
Spot70.FIN2	0.293333	112.5	3.7	191.9	5.8	152.9	4.5	1.70578	6375	5.37	0.12	2.23464	0.3393	0.007	2.06307	0.43673	0.0812	0.0022	1832	26	1880	33	1867	20	1561	99	102.62
Spot71.FIN2	0.153909	212.6	7.1	378	15	296	12	1.77799	12150	5.455	0.095	1.74152	0.3373	0.0058	1.71954	0.48698	0.0785	0.0016	1843	18	1871	28	1895	15	1488	57	101.519
Spot72.FIN2	0.374749	128.4	4.4	90.3	2.4	44.4	1.9	0.703271	4990	2.688	0.071	2.64137	0.2354	0.0052	2.20901	0.22815	0.0518	0.0024	1273	35	1362	27	1323	20	970	200	106.991
Spot73.FIN2	0.0907547	454	12	223.6	5.3	144.6	5.2	0.492511	20605	3.72	0.087	2.33871	0.279	0.0059	2.1147	0.5795	0.0609	0.0021	1509	21	1584	29	1573	19	1177	88	104.97
Spot74.FIN2	0.391213	85.4	3.5	90.5	3.9	71.6	3.7	1.05972	4780	5.43	0.14	2.57827	0.3391	0.0074	2.18225	0.42528	0.0771	0.0028	1872	30	1881	36	1882	22	1510	220	100.481
Spot75.FIN2	0.206973	219.3	5.5	134.5	2.9	69.9	2.5	0.613315	9035	3.116	0.068	2.18228	0.2451	0.0045	1.83599	0.40405	0.0528	0.0019	1397	25	1411	23	1435	17	960	120	101.002
Spot76.FIN2	0.81128	78.4	2.6	102.9	3.1	42.1	1.9	1.3125	2305	1.919	0.076	3.9604	0.1819	0.0048	2.63881	0.20322	0.0415	0.0019	1189	49	1077	26	1082	27	640	190	90.5803
Spot77.FIN2	0.353832	92.9	2.9	245	11	182.4	8.6	2.63724	5285	5.25	0.14	2.66667	0.3404	0.0077	2.26204	0.45416	0.0748	0.002	1780	27	1894	37	1846	22	1361	90	106.404
Spot78.FIN2	0.176166	190.4	7.8	326	14	229	10	1.71218	10615	5.43	0.1	1.84162	0.3408	0.006	1.76056	0.40486	0.0714	0.0016	1808	20	1891	29	1885	17	1327	72	104.591
Spot79.FIN2	0.273993	128.8	5.1	205.9	7.4	146.1	5.8	1.5986	6825	5.16	0.12	2.32558	0.3264	0.0066	2.02206	0.33754	0.0688	0.0019	1855	27	1814	32	1843	20	1400	100	97.7898
Spot80.FIN2	0.245246	141.5	4.3	162.9	4.9	123.1	4.4	1.15124	7625	5.22	0.11	2.10728	0.3354	0.0068	2.02743	0.50947	0.0745	0.0022	1789	23	1863	33	1857	19	1340	110	104.136
Spot81.FIN2	0.257753	136.2	5.6	184.1	7.2	132	5.5	1.35169	7255	5.26	0.12	2.28137	0.3343	0.0067	2.00419	0.42292	0.0709	0.0021	1808	24	1857	32	1851	20	1300	130	102.71
Spot82.FIN2	0.649306	54.3	1.7	53.3	1.7	37.5	1.8	0.981584	2880	5.26	0.16	3.04183	0.3339	0.0093	2.78527	0.44267	0.0706	0.0035	1876	36	1842	44	1849	26	910	350	98.1876
Spot83.FIN2	0.275405	125.9	4.4	280.7	9.1	207.1	7	2.22955	6790	5.29	0.12	2.26843	0.3381	0.0064	1.89293	0.42107	0.071	0.0018	1809	23	1871	31	1861	19	1256	85	103.427
Spot84.FIN2	0.896882	39.9	1.9	78.2	4	61	3.4	1.9599	2085	5.38	0.2	3.71747	0.333	0.011	3.3033	0.35047	0.0759	0.0033	1898	45	1832	52	1864	31	1150	270	96.5227
Spot85.FIN2	0.225301	156.9	3.8	199	3.5	144.2	3.7	1.26832	8300	5.32	0.11	2.06767	0.3325	0.0059	1.77444	0.53609	0.072	0.0019	1811	20	1849	29	1861	17	1352	78	102.098
Spot86.FIN2	0.351174	103.9	6.2	120.9	5	88	4	1.16362	5325	5.29	0.14	2.6465	0.3363	0.0077	2.28962	0.44989	0.071	0.0025	1804	26	1857	36	1851	22	1360	140	102.938
Spot87.FIN2	0.989418	38.8	1.5	59.8	2	44.6	2.2	1.54124	1890	5.07	0.21	4.14201	0.325	0.012	3.69231	0.29372	0.0718	0.0034	1895	48	1793	55	1801	36	1240	330	94.6174
Spot88.FIN2	0.236111	152.2	3	265.3	3.6	201.8	4.2	1.7431	7920	5.23	0.11	2.10325	0.3344	0.0063	1.88397	0.41403	0.0755	0.0017	1812	24	1858	30	1858	17	1401	67	102.539
Spot89.FIN2	0.323529	107.7	2.9	150.6	4.8	122.6	4.4	1.39833	5780	5.46	0.12	2.1978	0.3476	0.007	2.01381	0.42368	0.0821	0.0026	1810	23	1920	33	1893	19	1350	140	106.077
Spot90.FIN2	0.185885	189	4.7	205	4.6	162.9	4.2	1.08466	10060	5.48	0.1	1.82482	0.3473	0.0063	1.81399	0.48812	0.0804	0.0022	1801	20	1920	30	1892	16	1412	92	106.607
Spot91.FIN2	0.126351	443	19	108.4	4	50.8	2.6	0.244695	14800	2.591	0.048	1.85257	0.2167	0.0036	1.66128	0.46897	0.0449	0.002	1268	21	1261	19	1294	14	670	180	99.4479
Spot92.FIN2	0.0973958	357	12	359	10	252.7	9.3	1.0056	19200	5.88	0.1	1.70068	0.3546	0.0059	1.66385	0.53017	0.067	0.0015	1861	17	1955	28	1953	15	1278	55	105.051
Spot93.FIN2	0.161207	251	13	311	16	220	12	1.23904	11600	4.512	0.088	1.95035	0.3094	0.0052	1.68067	0.39065	0.0706	0.0018	1642	22	1736	26	1727	16	1385	96	105.725
Spot94.FIN2	0.198198	189.6	6.5	297	10	230.2	8.6	1.56646	9435	5.31	0.11	2.07156	0.3341	0.0063	1.88566	0.39017	0.0765	0.0018	1804	22	1853	30	1869	17	1449	73	102.716
Spot95.FIN2	0.163605	222.8	6.9	248.5	7	204.5	6.8	1.11535	11430	5.393	0.096	1.78009	0.3393	0.0057	1.67993	0.43785	0.0824	0.0019	1802	19	1878	27	1879	15	1575	79	104.218
Spot96.FIN2	0.252532	145.5	5.4	214.2	7.2	164.3	6.1	1.47216	7405	5.45	0.11	2.01835	0.3473	0.0074	2.13072	0.41093	0.0765	0.002	1827	25	1921	35	1888	18	1399	97	105.145
Spot97.FIN2	0.387565	153.3	5.4	135.9	4.4	70.5	2.9	0.886497	4825	2.509	0.07	2.78996	0.2137	0.0046	2.15255	0.27256	0.0526	0.0019	1268	36	1248	24	1275	20	930	140	98.4227
Spot98.FIN2	0.284195	131.6	4.8	183.2	6.7	151.5	5.9	1.3921	6580	5.38	0.12	2.23048	0.3422	0.0072	2.10403	0.47076	0.0833	0.0025	1778	25	1896	35	1879	19	1620	120	106.637
Spot99.FIN2	0.347907	105.3	6	126.7	7.6	102.7	6.1	1.20323	5375	5.6	0.14	2.5	0.3508	0.008	2.2805	0.38764	0.0811	0.0031	1855	28	1934	38	1910	22	1440	220	104.259
Spot100.FIN2	0.23852	180.2	5.2	193.6	5.2	138.4	4.9	1.07436	7840	4.347	0.092	2.1164	0.2961	0.0056	1.89125	0.36242	0.0708	0.0021	1691	25	1668	28	1701	17	1427	98	98.6399
Spot101.FIN2	0.57716	66.8	2.7	85.1	3.3	63.7	3	1.27395	3240	5.33	0.15	2.81426	0.3348	0.0088	2.62843	0.30181	0.0772	0.0033	1853	35	1866	43	1862	25	1110	260	100.702
Spot102.FIN2	0.259722	149.4	8.9	195	14	141.6	9.2	1.30522	7200	5.39	0.13	2.41187	0.3444	0.0071	2.06156	0.43856	0.0768	0.0026	1790	24	1902	34	1874	20	1390	160	106.257
Spot104.FIN2	0.293333	126.8	5.1	216	10	178	8.5	1.70347	6375	5.56	0.13	2.33813	0.3531	0.0071	2.01076	0.36306	0.0858	0.0028	1798	26	1943	34	1908	21	1540	130	108.065
Spot105.FIN2	0.196017	278.2	7.6	97	3	59	2.7	0.34867	9540	2.743	0.057	2.07802	0.2355	0.0042	1.78344	0.43219	0.0581	0.0024	1204	24	1361	22	1343	16	960	200	113.04
Spot106.FIN2	0.342491	114.4	3.4	44.2	1.6	35.7	1.9	0.386364	5460	5.32	0.12	2.25564	0.3405	0.0072	2.11454	0.39687	0.0814	0.0047	1804	27	1880	34	1872	19	1430	490	104.213
Spot107.FIN2	0.554896	82.3	2.8	68.4	2.1	44.3	2.2	0.831106	3370	4.31	0.14	3.24826	0.2942	0.0077	2.61727	0.32896	0.0664	0.0033	1683	40	1654	38	1680	26	1360	270	98.2769
Spot109.FIN2	0.409639	95.3	2	134	2.6	111.7	3.2	1.40609	4565	5.27	0.13	2.46679	0.3371	0.0071	2.1062	0.39727	0.0809	0.0026	1804	27	1872	34	1862	21	1480	140	103.769
Spot110.FIN2	0.304312	133.8	2.8	328.2	5.4	221.1	4.9	2.45291	6145	5.1	0.11	2.15686	0.3236	0.0064	1.97775	0.3995	0.0659	0.0017	1811	23	1807	31	1830	18	1245	59	99.7791
Spot111.FIN2	0.178691	224.2	8.2	568	19	425	16	2.53345	10465	5.37	0.11	2.04842	0.3381	0.0061	1.8042	0.50396	0.071	0.0014	1806	20	1878	29	1874	17	1332	44	103.987
Spot112.FIN2	0.23058	176	5.1	496	13	348.4	9.9	2.81818	8110	5.06	0.11	2.17391	0.332	0.0061	1.83735	0.46162	0.0682	0.0015	1769	22	1845	29	1829	18	1301	48	104.296
Spot113.FIN2	0.278689	144.4	8	193	14	135.6	9.9	1.33657	6710	5.35	0.13	2.42991	0.3477	0.0074	2.12827	0.45172	0.0731	0.0034	1786	27	1917	36	1867	20	1220	280	107.335
Spot114.FIN2	0.23115	172.4	9.1	254	14	191	11	1.47332	8090	5.33	0.12	2.25141	0.3444	0.0069	2.00348	0.41371	0.0711	0.002	1790	23	1905	33	1875	19	1500	120	106.425
Spot115.FIN2	0.208009	187.6	9.5	239	11	188	10	1.27399	8990	5.45	0.11	2.01835	0.3509	0.0062	1.76689	0.41216	0.0731	0.0019	1783	22	1941	29	1893	17	1309	99	108.861
Spot116.FIN2	0.23463	172	7.5	133.3	5.2	102.8	4.4	0.775	7970	5.18	0.11	2.12355	0.3414	0.0066	1.93322	0.4306	0.0749	0.0026	1751	23	1890	31	1844	19	1290	180	107.938
Spot117.FIN2	0.100727	415	10	320.3	7.2	232	6.2	0.771807	18565	4.734	0.074	1.56316	0.3229	0.0047	1.45556	0.55475	0.0688	0.0016	1645	15	1802	23	1771	13	1237	66	109.544
Spot118.FIN2	0.443128	90.9	2.6	112.2	2.8	81.7	3	1.23432	4220	5.31	0.14	2.63653	0.3397	0.0084	2.47277	0.45593	0.0705	0.0027	1826	28	1875	40	1864	22	1210	160	102.683
Spot119.FIN2	0.252703	168.8	5.5	294	10	214.5	8.1	1.74171	7400	5.07	0.11	2.16963	0.3239	0.0063	1.94504	0.41428	0.0662	0.0016	1785	23	1807	31	1824	18	1247	73	101.232
Spot120.FIN2	0.480103	86.2	2.9	68.7	2.2	47.8	2.2	0.796984	3895	4.96	0.14	2.82258	0.3337	0.0082	2.4573	0.3644	0.0681	0.0033	1759	33	1848	40	1802	23	770	330	105.06
Spot121.FIN2	0.362755	117.5	3.4	193.2	4.5	137.4	4.3	1.64426	5155	5.04	0.12	2.38095	0.3254	0.0072	2.21266	0.41349	0.067	0.002	1781	28	1811	35	1824	21	1281	96	101.684
Spot122.FIN2	0.151847	287.2	8.5	584	28	421	24	2.03343	12315	4.92	0.11	2.23577	0.3272	0.0073	2.23105	0.55986	0.0622	0.0016	1725	23	1819	35	1803	20	1132	49	105.449
Spot123.FIN2	0.645941	62	2.1	58.2	3	43.5	2.6	0.93871	2895	5.28	0.16	3.0303	0.344	0.0087	2.52907	0.33651	0.0778	0.0047	1822	35	1899	42	1868	27	1710	420	104.226
Spot124.FIN2	0.110684	370.4	9.5	129.7	7.6	100.3	5.6	0.350162	16895	5.325	0.084	1.57746	0.335	0.0055	1.64179	0.49647	0.0767	0.0031	1798	17	1858	26	1870	13	1410	210	103.337
Spot126.FIN2	0.310373	128.9	4.3	256.9	9.4	201.9	7.7	1.99302	6025	5.39	0.12	2.22635	0.3439	0.0069	2.0064	0.39698	0.0729	0.0021	1803	24	1903	32	1886	19	1357	82	105.546
Spot127.FIN2	0.790698	113.4	3.3	528.5	6.9	193.7	4.6	4.66049	2365	1.467	0.059	4.02181	0.1523	0.0039	2.56074	0.2224	0.03456	0.00086	1008	46	911	22	907	25	641	39	90.377
Spot128.FIN2	0.942065	43.7	1.1	66.9	1.5	50.2	2.2	1.53089	1985	5.42	0.2	3.69004	0.346	0.011	3.17919	0.39635	0.0725	0.0034	1874	44	1891	50	1868	32	890	310	100.907
Spot129.FIN2	0.161905	252	12	236	10	191.6	8.7	0.936508	11550	5.33	0.1	1.87617	0.3384	0.0058	1.71395	0.44193	0.0741	0.0022	1807	22	1876	28	1868	16	1327	97	103.818
Spot130.FIN2	0.12901	309.6	8.9	308	10	242.5	9.2	0.994832	14495	5.53	0.11	1.98915	0.3524	0.0067	1.90125	0.56024	0.0713	0.0019	1795	18	1944	31	1902	17	1311	81	108.301
Spot131.FIN2	0.743539	56.2	1.2	95.4	2.1	74	2.8	1.69751	2515	5.24	0.16	3.05344	0.3379	0.009	2.66351	0.29791	0.0731	0.003	1850	41	1871	43	1850	27	1140	200	101.135
Spot132.FIN2	0.241915	174.8	7.7	279	14	211	11	1.59611	7730	5.3	0.12	2.26415	0.3344	0.0067	2.00359	0.39653	0.0719	0.0019	1808	24	1861	32	1860	20	1410	79	102.931
Spot133.FIN2	0.208357	178.8	8.5	183.8	7.5	174.1	7.1	1.02796	8975	6.42	0.13	2.02492	0.3857	0.0077	1.99637	0.46428	0.0903	0.0028	1929	21	2101	35	2033	17	1610	130	108.917
Spot134.FIN2	0.641509	68.2	2.3	85.3	2.6	68	3.5	1.25073	2915	5.31	0.22	4.14313	0.332	0.011	3.31325	0.3993	0.073	0.0039	1887	43	1848	52	1861	35	1130	260	97.9332
Spot135.FIN2	0.742063	97.7	4	44.6	2	20.7	1.6	0.456499	2520	1.966	0.072	3.66226	0.1947	0.0054	2.7735	0.2682	0.0423	0.0031	1066	47	1143	29	1098	25	1090	510	107.223
Spot136.FIN2	0.38517	107.5	4.4	123.4	4.8	103.3	4.5	1.14791	4855	5.19	0.13	2.50482	0.339	0.0078	2.30088	0.4226	0.0803	0.003	1777	32	1880	37	1847	22	1250	210	105.796
Spot137.FIN2	0.283333	141.3	5.3	237.3	7.4	204.3	7	1.67941	6600	5.57	0.12	2.1544	0.3581	0.007	1.95476	0.44261	0.08	0.0022	1792	25	1969	33	1904	19	1582	81	109.877
Spot138.FIN2	0.391213	107	4.4	111.4	4.9	88.4	4.4	1.04112	4780	5.32	0.13	2.44361	0.3365	0.0078	2.31798	0.34346	0.078	0.0034	1836	29	1861	37	1859	22	1220	250	101.362
Spot139.FIN2	0.246702	159.3	3.4	363	16	296	14	2.27872	7580	5.37	0.11	2.04842	0.3472	0.0069	1.98733	0.43677	0.0792	0.0019	1778	24	1917	33	1878	18	1486	76	107.818
Spot140.FIN2	0.192189	224	8.6	421	18	242.6	8.8	1.87946	9730	5.34	0.13	2.43446	0.3332	0.0071	2.13085	0.47673	0.0545	0.002	1823	24	1852	34	1868	21	1093	74	101.591
Spot141.FIN2	0.407852	169.7	5.7	204	6.6	109.7	4.4	1.20212	4585	2.296	0.07	3.04878	0.2035	0.0047	2.30958	0.35058	0.0486	0.0016	1212	36	1190	25	1196	21	921	92	98.1848
Spot142.FIN2	0.293103	141.1	4.7	328	11	259.1	9	2.32459	6380	5.43	0.12	2.20994	0.3431	0.0069	2.01108	0.3732	0.0751	0.0018	1837	25	1894	33	1887	19	1478	66	103.103
Spot143.FIN2	0.115789	374	17	194.3	6.9	132.7	5.1	0.519519	16150	5.15	0.11	2.13592	0.3375	0.0067	1.98519	0.46774	0.0638	0.0028	1733	22	1873	32	1839	18	1060	130	108.078
Spot144.FIN2	0.333333	234	15	207	17	80.6	6.9	0.884615	5610	1.892	0.057	3.01268	0.176	0.0046	2.61364	0.3644	0.032	0.0016	1143	36	1045	25	1087	20	510	180	91.4261
Spot145.FIN2	1.89367	27.7	1	37.8	1.3	21.6	1.6	1.36462	987.5	3.66	0.22	6.01093	0.276	0.012	4.34783	0.26492	0.0594	0.0049	1741	78	1554	62	1528	46	740	670	89.259
Spot146.FIN2	0.23115	176.3	7.7	263	14	218	11	1.49178	8090	5.52	0.12	2.17391	0.3495	0.0069	1.97425	0.47231	0.0796	0.0022	1831	22	1928	32	1895	18	1350	110	105.298
Spot148.FIN2	0.528249	112.1	3.2	99.6	2.5	57.9	2.4	0.888492	3540	2.924	0.09	3.07798	0.2413	0.0055	2.27932	0.30188	0.0554	0.0025	1374	37	1393	28	1373	23	830	210	101.383
Spot149.FIN2	0.305556	138.8	7.1	263	14	230	13	1.89481	6120	5.36	0.13	2.42537	0.3354	0.0077	2.29577	0.46657	0.0805	0.0023	1853	28	1860	37	1872	21	1530	100	100.378
Spot150.FIN2	0.392034	106.9	3.8	166	6.4	140.4	6	1.55285	4770	5.39	0.14	2.5974	0.3386	0.0077	2.27407	0.32143	0.0775	0.0024	1846	31	1874	37	1873	22	1430	130	101.517
Spot151.FIN2	0.692593	59.3	3.3	95.6	5.9	81.2	5.2	1.61214	2700	5.73	0.21	3.66492	0.35	0.01	2.85714	0.38147	0.0823	0.0039	1968	41	1923	47	1916	31	1460	320	97.7134
Spot152.FIN2	0.29472	137.3	4.8	256.5	8.6	206.1	7.1	1.86817	6345	5.54	0.12	2.16606	0.3533	0.0071	2.00962	0.36576	0.0759	0.0021	1810	25	1945	34	1902	19	1495	86	107.459
Spot153.FIN2	0.294256	139.2	3.5	327.6	6.7	264	5.9	2.35345	6355	5.39	0.12	2.22635	0.3476	0.007	2.01381	0.46	0.0765	0.002	1821	24	1920	33	1879	19	1430	64	105.437
Spot154.FIN2	0.326353	215.6	8.4	84.2	3.6	42.6	2.3	0.390538	5730	2.198	0.055	2.50227	0.2061	0.0043	2.08637	0.29207	0.0477	0.0026	1103	31	1204	23	1177	17	1030	270	109.157
Spot155.FIN2	0.26264	161.2	6.9	420	19	326	15	2.60546	7120	5.43	0.12	2.20994	0.3369	0.0069	2.04809	0.40124	0.0729	0.0018	1874	25	1866	33	1888	20	1354	74	99.5731
Spot156.FIN2	0.234189	172.7	6.1	440	16	373	14	2.54777	7985	5.41	0.12	2.21811	0.3466	0.0066	1.90421	0.48502	0.0778	0.0017	1800	25	1915	31	1880	19	1484	51	106.389
Spot157.FIN2	0.215438	250	13	119.7	7	72.9	4.7	0.4788	8680	3.24	0.07	2.16049	0.2651	0.0054	2.03697	0.388	0.0582	0.0029	1342	26	1518	27	1467	17	710	320	113.115
Spot158.FIN2	0.237611	177.8	7.6	202.4	7.3	167.7	6.5	1.13836	7870	5.28	0.12	2.27273	0.3439	0.0071	2.06455	0.39058	0.0767	0.0024	1782	26	1903	34	1858	19	1400	110	106.79
Spot159.FIN2	0.88	49.4	1.9	74.1	3	54.6	2.8	1.5	2125	5.21	0.2	3.83877	0.324	0.01	3.08642	0.34609	0.072	0.0038	1917	49	1799	49	1835	31	1270	330	93.8445
Spot160.FIN2	0.495364	84	3.5	127.1	4.8	109.3	4.3	1.5131	3775	5.48	0.16	2.91971	0.3482	0.009	2.58472	0.44637	0.0804	0.0028	1862	35	1923	42	1884	24	1450	150	103.276
Spot161.FIN2	0.272	154	11	220	14	167	11	1.42857	6875	5.36	0.14	2.61194	0.3391	0.0079	2.3297	0.42271	0.0732	0.0026	1831	28	1872	37	1867	21	1290	190	102.239
Spot162.FIN2	0.800857	51.3	1.1	73.7	1.9	60.3	2.7	1.43665	2335	5.33	0.18	3.37711	0.345	0.011	3.18841	0.40069	0.0733	0.0033	1835	40	1899	50	1854	30	1370	220	103.488
Spot163.FIN2	0.361702	113.3	4.4	224.6	9.4	174.6	7.3	1.98235	5170	5.39	0.13	2.41187	0.3457	0.0078	2.25629	0.37693	0.0743	0.0023	1822	28	1909	37	1874	21	1420	100	104.775
Spot164.FIN2	0.226529	182	3.6	197.4	4.1	161.2	4.6	1.08462	8255	5.2	0.11	2.11538	0.3354	0.0063	1.87835	0.48059	0.0724	0.0021	1767	22	1866	31	1845	19	1394	89	105.603
Spot165.FIN2	0.464596	87.4	3.1	63.9	2.2	53.3	2.8	0.731121	4025	5.86	0.17	2.90102	0.3604	0.0097	2.69145	0.39551	0.0738	0.0038	1921	34	1978	46	1950	25	860	350	102.967
Spot166.FIN2	0.245085	168.4	5.3	235.5	4	182.4	4.6	1.39846	7630	5.31	0.11	2.07156	0.3446	0.0067	1.94428	0.44081	0.0711	0.0019	1796	23	1906	32	1869	18	1310	80	106.125
Spot167.FIN2	0.116438	350.2	6.9	230.9	4.7	199.4	5.6	0.659338	16060	5.71	0.12	2.10158	0.3527	0.0073	2.06975	0.54806	0.0754	0.0023	1868	22	1947	35	1928	18	1399	92	104.229
Spot168.FIN2	0.23201	173.5	3	333.5	8.3	253.6	8.5	1.92219	8060	5.17	0.13	2.51451	0.3344	0.0077	2.30263	0.35702	0.0735	0.0022	1772	29	1852	37	1838	22	1371	72	104.515
Spot169.FIN2	0.586207	147	5.5	217	9.5	80.9	4	1.47619	3190	1.703	0.058	3.40575	0.1672	0.0042	2.51196	0.2231	0.0364	0.0015	1074	42	996	23	1010	22	460	130	92.7374
Spot170.FIN2	0.285933	218	7.9	88.6	3.6	44.3	2.4	0.406422	6540	2.677	0.069	2.57751	0.2231	0.0047	2.10668	0.41249	0.0491	0.0025	1310	29	1297	24	1318	19	800	260	99.0076
Spot171.FIN2	0.199786	204.9	4.1	248.8	4.6	180.1	4.9	1.21425	9360	5.18	0.11	2.12355	0.3339	0.0065	1.94669	0.44891	0.0673	0.0018	1780	23	1863	32	1848	18	1183	78	104.663
Spot172.FIN2	0.105949	419	12	410	11	253	11	0.97852	17650	5.18	0.12	2.3166	0.3195	0.0076	2.37872	0.59619	0.0515	0.0016	1863	22	1784	37	1848	20	1014	56	95.7595
Spot174.FIN2	0.22	183	11	311	19	243	15	1.69945	8500	5.38	0.13	2.41636	0.3416	0.0072	2.10773	0.43116	0.0722	0.002	1812	24	1894	35	1874	21	1310	120	104.525
Spot175.FIN2	0.260627	150.5	5.9	193.5	7.2	156.9	6.5	1.28571	7175	5.62	0.13	2.31317	0.3577	0.0073	2.04082	0.38023	0.0774	0.0024	1820	25	1963	34	1921	20	1420	120	107.857
Spot176.FIN2	0.445238	89.3	3.5	129.1	4.6	101.9	4.4	1.44569	4200	5.57	0.16	2.87253	0.3553	0.0085	2.39234	0.31487	0.0755	0.0028	1845	35	1955	40	1908	25	1250	170	105.962
Spot178.FIN2	0.53125	95.7	2.5	62.1	1.6	38.1	2	0.648903	3520	3.69	0.11	2.98103	0.279	0.0064	2.29391	0.3061	0.0611	0.0033	1515	36	1578	32	1563	23	790	320	104.158
Spot181.FIN2	0.136996	298	12	259	11	191.1	8.4	0.869128	13650	5.07	0.1	1.97239	0.3416	0.0067	1.96136	0.57695	0.0704	0.0021	1674	20	1891	32	1827	17	1369	91	112.963
Spot182.FIN2	0.513032	127.2	4.2	232	11	100.3	5.2	1.8239	3645	2.33	0.071	3.04721	0.2146	0.0053	2.46971	0.2818	0.0417	0.0015	1163	37	1252	28	1215	22	870	120	107.653
Spot183.FIN2	0.444181	93.5	3.6	133.8	4.5	96.4	4.2	1.43102	4210	5.42	0.16	2.95203	0.347	0.0093	2.68012	0.55798	0.0678	0.0025	1806	29	1903	44	1878	25	1170	160	105.371
Spot184.FIN2	0.171796	266	10	258.6	4.7	147.5	4.8	0.97218	10885	4.261	0.085	1.99484	0.3013	0.0058	1.92499	0.45064	0.0546	0.0015	1624	24	1694	28	1685	17	1120	66	104.31
Spot185.FIN2	0.481338	99.9	4.8	82.9	4	55.6	3.3	0.82983	3885	3.99	0.14	3.50877	0.2887	0.0079	2.7364	0.34022	0.0661	0.0038	1588	42	1628	39	1607	28	1030	300	102.519
Spot186.FIN2	0.107041	366	12	516	11	414.3	9.8	1.40984	17470	5.75	0.11	1.91304	0.3591	0.0064	1.78223	0.59543	0.0781	0.0017	1835	17	1974	30	1938	16	1488	44	107.575
Spot187.FIN2	0.177251	377	21	204	10	99.5	6.3	0.541114	10550	2.357	0.055	2.33347	0.2095	0.0039	1.86158	0.33924	0.045	0.0017	1165	29	1224	21	1225	17	690	120	105.064
Spot188.FIN2	0.391213	194.6	4.6	178.7	6.2	73.4	3.5	0.918294	4780	1.894	0.05	2.63992	0.1849	0.0038	2.05516	0.22808	0.0406	0.0017	1031	34	1090	21	1075	17	650	160	105.723
Spot189.FIN2	0.22708	401	18	481	14	154.9	5.7	1.1995	8235	1.582	0.037	2.33881	0.1503	0.0028	1.86294	0.40439	0.03083	0.00088	1034	28	902	16	967	15	555	43	87.234
Spot190.FIN2	0.222884	190.9	8.3	286	14	208	10	1.49817	8390	4.92	0.11	2.23577	0.3255	0.0061	1.87404	0.48611	0.0734	0.0023	1729	23	1817	29	1804	18	1400	110	105.09
Spot191.FIN2	0.379695	111.5	3.9	141.1	5	101.5	4.8	1.26547	4925	5.37	0.15	2.7933	0.3415	0.0093	2.72328	0.34162	0.0689	0.0028	1825	33	1883	44	1879	25	1220	170	103.178
Spot192.FIN2	0.431871	87.9	2.6	124.7	3.6	100.1	3.8	1.41866	4330	5.62	0.15	2.66904	0.364	0.0087	2.39011	0.40724	0.081	0.0029	1791	30	1992	41	1911	23	1310	170	111.223
Spot194.FIN2	0.459459	167	5.6	70.5	2.2	29.3	1.8	0.422156	4070	1.966	0.058	2.95015	0.1854	0.0038	2.04962	0.20495	0.0421	0.0026	1072	39	1093	21	1107	20	540	320	101.959
Spot195.FIN2	0.226942	154.9	5	197.9	6.8	161.8	5.9	1.2776	8240	6.93	0.16	2.3088	0.3912	0.0083	2.12168	0.58504	0.0843	0.0027	2016	21	2120	38	2096	20	1540	150	105.159
Spot196.FIN2	0.275	140.9	5.1	332	13	253.3	9.7	2.35628	6800	5.54	0.13	2.34657	0.3591	0.0076	2.1164	0.48044	0.0775	0.002	1794	25	1965	36	1897	20	1468	72	109.532
Spot197.FIN2	0.508844	78.8	3.8	149.5	7.1	114.3	5.5	1.89721	3675	5.44	0.17	3.125	0.3468	0.0088	2.53749	0.35044	0.0789	0.0027	1838	36	1917	42	1872	26	1380	190	104.298
Spot199.FIN2	0.295419	130.7	4.7	135.4	4.9	118	5.3	1.03596	6330	5.7	0.14	2.45614	0.3627	0.009	2.48139	0.34987	0.0809	0.003	1813	30	1990	43	1926	21	1610	140	109.763
Spot200.FIN2	0.244925	154.3	5.7	163.5	5.6	132	5.6	1.05962	7635	5.76	0.12	2.08333	0.36	0.0072	2	0.45167	0.0804	0.0025	1833	23	1982	34	1938	19	1290	140	108.129
Spot202.FIN2	0.28057	137.6	2.7	303.6	8.8	227.3	8	2.2064	6665	5.18	0.13	2.50965	0.3406	0.0077	2.26072	0.42031	0.079	0.0023	1732	30	1891	37	1832	22	1479	76	109.18
Spot203.FIN2	0.316145	141.9	4	118	4.4	81.4	4	0.831572	5915	4.81	0.13	2.7027	0.3127	0.0077	2.46242	0.36559	0.0656	0.0032	1773	31	1749	38	1790	23	1160	220	98.6464
Spot204.FIN2	0.395767	106.6	6.9	169.6	9.7	95	6.4	1.59099	4725	5.46	0.21	3.84615	0.345	0.011	3.18841	0.47374	0.0532	0.0024	1872	42	1892	53	1873	32	960	200	101.068
Spot205.FIN2	0.264498	152.2	3.4	142.5	2.8	107.1	3.3	0.936268	7070	5.37	0.11	2.04842	0.3402	0.0066	1.94004	0.46291	0.0757	0.0024	1835	23	1882	31	1873	18	1350	130	102.561
Spot206.FIN2	0.398721	100.3	3.9	146.1	6.4	100.4	4.7	1.45663	4690	5.41	0.14	2.5878	0.3423	0.0077	2.24949	0.35369	0.0699	0.0027	1815	29	1894	37	1880	23	1270	170	104.353
Spot207.FIN2	0.16382	249.1	9.9	497	17	370	14	1.99518	11415	5.34	0.11	2.05993	0.3397	0.0062	1.82514	0.51591	0.0712	0.0015	1792	21	1882	29	1873	18	1377	54	105.022
Spot208.FIN2	0.23959	170.4	8.4	233	11	181.6	8.7	1.36737	7805	5.43	0.12	2.20994	0.3431	0.007	2.04022	0.44699	0.0754	0.0022	1824	24	1904	33	1885	19	1560	95	104.386
Spot209.FIN2	0.23641	173.4	8.6	368	22	263	15	2.12226	7910	5.36	0.12	2.23881	0.3449	0.0069	2.00058	0.336	0.0752	0.0022	1805	25	1905	33	1880	20	1350	110	105.54
Spot210.FIN2	0.285496	145.5	6.1	342	17	242	11	2.35052	6550	5.42	0.12	2.21402	0.3381	0.0068	2.01124	0.36376	0.0738	0.0024	1853	25	1875	33	1880	20	1410	120	101.187
Spot211.FIN2	0.240824	163.4	5.3	249.6	6.1	188.8	5.3	1.52754	7765	5.58	0.11	1.97133	0.3511	0.0065	1.85132	0.32897	0.0744	0.002	1833	24	1931	31	1906	17	1414	77	105.346
Spot212.FIN2	0.245407	165	3.6	230.9	5.3	162.3	5.1	1.39939	7620	5.33	0.11	2.06379	0.3405	0.0067	1.96769	0.45454	0.0712	0.0021	1826	25	1883	32	1865	18	1280	89	103.122
Spot213.FIN2	0.476433	117.3	3.7	55	2.3	31.4	2	0.468883	3925	2.886	0.085	2.94525	0.2474	0.0056	2.26354	0.28361	0.0546	0.0032	1318	35	1419	29	1376	22	920	390	107.663
Spot214.FIN2	0.145412	281.4	6.1	175.6	3.2	123.2	3.5	0.624023	12860	5.53	0.1	1.80832	0.3338	0.0058	1.73757	0.52442	0.0703	0.0022	1902	19	1853	28	1902	15	1300	100	97.4238
Spot215.FIN2	0.29659	138.9	5.9	191	7.7	134.9	5.6	1.37509	6305	5.22	0.13	2.49042	0.3394	0.007	2.06246	0.44254	0.0726	0.0024	1787	28	1883	33	1845	21	1420	130	105.372
Spot216.FIN2	0.488889	106.2	5.1	59.5	2.5	36.2	2	0.560264	3825	3.66	0.11	3.00546	0.2706	0.0069	2.54989	0.40072	0.0638	0.0036	1564	34	1546	34	1551	24	1120	360	98.8491
Spot217.FIN2	1.1873	49.2	2	61.9	3.3	34.1	2.2	1.25813	1575	2.86	0.13	4.54545	0.231	0.0083	3.59307	0.29784	0.0569	0.0034	1549	59	1328	43	1358	33	860	430	85.7327
Spot218.FIN2	0.338156	115	3.6	234.1	8	182.4	7.4	2.03565	5530	5.57	0.14	2.51346	0.3475	0.0078	2.2446	0.46502	0.0734	0.0021	1831	27	1922	37	1902	22	1293	92	104.97
Spot219.FIN2	1.92784	43.3	1.8	31.9	1.8	11.4	1.1	0.736721	970	1.71	0.11	6.43275	0.1705	0.0072	4.22287	0.25916	0.0482	0.0082	1365	75	1000	39	935	45	870	930	73.2601
Spot220.FIN2	0.198936	215.4	7.2	448	14	293.1	9.3	2.07985	9400	4.668	0.097	2.07798	0.3201	0.0062	1.93689	0.44734	0.0642	0.0014	1695	22	1788	30	1752	17	1182	58	105.487
Spot221.FIN2	0.204037	199.3	8.1	232.7	8.9	168.2	6.9	1.16759	9165	5.28	0.11	2.08333	0.3415	0.0069	2.0205	0.50373	0.0726	0.0021	1797	22	1886	33	1862	18	1450	100	104.953
Spot222.FIN2	0.935	44.1	1.1	59.5	1.7	40.3	2.3	1.34921	2000	5.51	0.22	3.99274	0.334	0.012	3.59281	0.24858	0.0654	0.0042	1964	51	1848	56	1891	35	1260	340	94.0937
Spot223.FIN2	0.215314	187.2	7.8	404	17	288	12	2.15812	8685	5.3	0.11	2.07547	0.339	0.0069	2.0354	0.42713	0.071	0.0017	1814	25	1881	33	1868	18	1265	73	103.693
Spot225.FIN2	0.218713	181	7.5	108.9	7.2	88.6	6.4	0.601657	8550	5.59	0.12	2.14669	0.3485	0.0072	2.066	0.47472	0.0831	0.0055	1833	23	1926	34	1911	19	1620	320	105.074
Spot226.FIN2	1.24252	48.4	1.6	51.3	1.6	25.3	1.5	1.05992	1505	2.77	0.13	4.69314	0.2297	0.0078	3.39573	0.28976	0.0497	0.0031	1519	57	1324	40	1330	34	440	430	87.1626
Spot227.FIN2	0.475222	85.9	5	124	11	93.4	7.9	1.44354	3935	5.32	0.17	3.19549	0.348	0.01	2.87356	0.38422	0.0761	0.0046	1823	36	1919	48	1867	27	1560	350	105.266
Spot228.FIN2	0.225301	175.4	6.2	290	6.6	210.7	6	1.65336	8300	5.48	0.12	2.18978	0.3519	0.0072	2.04604	0.42588	0.0716	0.0019	1814	24	1936	34	1891	18	1295	75	106.725
Spot229.FIN2	0.71785	83.9	3	66.1	2.6	32	1.9	0.787843	2605	2.863	0.094	3.28327	0.2349	0.0065	2.76713	0.30465	0.0486	0.0029	1412	42	1358	33	1357	24	930	340	96.1756
Spot230.FIN2	0.315346	125.3	3	283.4	6.2	204.4	6.4	2.26177	5930	5.41	0.12	2.21811	0.3449	0.0071	2.05857	0.44738	0.0717	0.0018	1825	23	1907	34	1881	19	1306	69	104.493
Spot231.FIN2	0.3692	103.7	4.5	146.8	6.6	109.5	5.5	1.41562	5065	6.16	0.16	2.5974	0.3669	0.0091	2.48024	0.46254	0.0719	0.0028	1945	31	2004	42	1988	23	1380	200	103.033
Spot232.FIN2	0.5984	67.9	2.5	167.5	6.5	117.1	4.9	2.46686	3125	5.26	0.17	3.23194	0.3404	0.0094	2.76146	0.43754	0.0712	0.0024	1856	33	1879	45	1846	27	1260	150	101.239
Spot233.FIN2	0.632826	65.2	1.7	93.2	2.3	67	2.5	1.42945	2955	5.36	0.16	2.98507	0.3355	0.0089	2.65276	0.43653	0.0726	0.003	1900	33	1855	43	1866	25	1170	210	97.6316
Spot234.FIN2	0.161905	222	13	201	14	156	11	0.905405	11550	6.44	0.14	2.17391	0.376	0.0074	1.96809	0.45744	0.0736	0.0024	1941	26	2060	35	2038	20	1080	180	106.131
Spot235.FIN2	0.136496	321	14	479	20	278	15	1.49221	13700	4.72	0.11	2.33051	0.3194	0.0071	2.22292	0.46252	0.0536	0.0015	1668	25	1785	35	1766	19	1010	57	107.014
Spot236.FIN2	0.528249	109.8	5.7	184.6	5.1	104.2	4.3	1.68124	3540	2.97	0.11	3.7037	0.2416	0.0065	2.6904	0.20613	0.0575	0.0023	1412	43	1385	33	1385	28	950	130	98.0878
Spot237.FIN2	0.599359	69	2.4	92.2	2.9	65.2	3.2	1.33623	3120	5.22	0.18	3.44828	0.34	0.01	2.94118	0.30838	0.0658	0.0031	1821	41	1874	48	1858	31	1150	220	102.91
Spot238.FIN2	0.350187	124.9	6	328	19	226	12	2.6261	5340	4.82	0.14	2.90456	0.3172	0.0077	2.42749	0.50488	0.0674	0.0022	1750	31	1772	37	1775	24	1150	110	101.257
Spot239.FIN2	0.396186	145.7	4	43.7	2	24.8	1.6	0.299931	4720	2.849	0.081	2.8431	0.2397	0.0053	2.2111	0.33578	0.0712	0.0069	1273	34	1381	28	1354	21	540	670	108.484
Spot240.FIN2	0.383984	155.4	6.8	353	18	171.3	9.1	2.27156	4870	2.645	0.071	2.68431	0.2264	0.0051	2.25265	0.23926	0.048	0.0015	1255	38	1315	26	1314	20	929	86	104.781
Spot241.FIN2	0.282051	231.4	9	328	13	153.6	6.3	1.41746	6630	2.362	0.058	2.45555	0.2126	0.0044	2.06961	0.29425	0.0467	0.0014	1186	28	1241	23	1224	17	808	74	104.637
Spot242.FIN2	0.279522	119.9	4.2	47.3	1.8	39.1	2.1	0.394495	6690	7.42	0.17	2.29111	0.4046	0.0084	2.07612	0.43453	0.0795	0.0041	2068	25	2185	38	2160	20	1190	440	105.658
Spot243.FIN2	0.297297	136.2	4.8	166.3	5.4	121.6	4.6	1.221	6290	5.48	0.13	2.37226	0.3417	0.0068	1.99005	0.47189	0.0733	0.0025	1827	24	1892	32	1884	20	1200	130	103.558
Spot244.FIN2	0.29659	151	11	277	29	200	19	1.83444	6305	5.19	0.15	2.89017	0.3262	0.0081	2.48314	0.33952	0.0717	0.0029	1846	33	1826	40	1852	24	1540	170	98.9166
Spot245.FIN2	0.159556	232.8	9.7	170.3	8.5	132.9	6.9	0.731529	11720	6.32	0.11	1.74051	0.3672	0.0062	1.68845	0.45244	0.0779	0.0027	1943	19	2015	29	2022	16	1360	150	103.706
Spot246.FIN2	0.224086	217.8	8.1	199.8	7.1	120.9	5.1	0.917355	8345	3.531	0.088	2.49221	0.2674	0.0058	2.16904	0.42678	0.0623	0.0025	1455	30	1529	29	1530	20	1060	140	105.086
Spot247.FIN2	0.461728	87.5	3.7	147	6.8	112.9	5.6	1.68	4050	5.2	0.14	2.69231	0.3387	0.0083	2.45055	0.32168	0.0741	0.0026	1801	33	1876	40	1849	23	1310	180	104.164
Spot248.FIN2	0.255989	151	4.4	151.7	4.1	119.9	3.8	1.00464	7305	5.55	0.12	2.16216	0.3524	0.0071	2.01476	0.43218	0.0787	0.0026	1792	23	1943	33	1902	20	1360	130	108.426
Spot249.FIN2	0.321582	124.4	5.9	142.1	7.3	102.9	5.7	1.14228	5815	5.48	0.13	2.37226	0.3423	0.0071	2.0742	0.38385	0.07	0.0027	1835	26	1895	34	1894	20	1210	180	103.27
Spot250.FIN2	0.318569	121.7	3.1	271.6	7	203.6	6.3	2.23172	5870	5.58	0.14	2.50896	0.349	0.0074	2.12034	0.41843	0.0724	0.002	1817	28	1925	36	1912	22	1333	81	105.944
Spot251.FIN2	0.192288	225.2	8.4	319	12	221.4	9	1.41652	9725	4.79	0.1	2.08768	0.3211	0.0058	1.80629	0.38545	0.0664	0.0018	1688	23	1792	28	1783	18	1200	88	106.161
Spot252.FIN2	1.1761	34.9	1.1	47.7	1.5	33.8	2.3	1.36676	1590	5.44	0.28	5.14706	0.348	0.015	4.31034	0.22467	0.0694	0.0049	1897	64	1896	72	1860	44	900	500	99.9473
Spot253.FIN2	0.253045	157.9	3.2	239.3	4.3	177.1	4.6	1.51552	7390	5.38	0.11	2.04461	0.3389	0.0066	1.94748	0.42499	0.0729	0.0019	1816	22	1877	32	1878	18	1266	81	103.359
Spot254.FIN2	0.24834	307	12	168	6.3	66.4	3.1	0.547231	7530	1.84	0.044	2.3913	0.1778	0.0033	1.85602	0.31242	0.0394	0.0016	999	29	1054	18	1054	16	550	150	105.506
Spot255.FIN2	0.743539	55.8	2.5	100.7	5.2	69.5	3.6	1.80466	2515	5.12	0.16	3.125	0.3342	0.0098	2.93238	0.37662	0.0723	0.0032	1828	37	1844	47	1840	27	900	280	100.875
1 data not corrected for common-Pb
2 Concordance calculated as (206Pb-238U age/207Pb-206Pb age)*100
f206c = the proportion of the 206Pb ion beam that is common, calculated as (206Pb204Pbmodel/206Pb204Pb measured)* 100
where 206Pb204Pb measured = (Stacey and Kramers, 1975) 206Pb/204Pb ratio at the apparent (non-common Pb corrected) 207Pb/206Pb age

## Sheet: TQ-18
Spot	f206	U		Th		Pb		Th/U		Isotopic Ratios1									Ages (Ma)1								% conc2
	(%)	(mg.g-1)	2σ	(mg.g-1)	2σ	(mg.g-1)	2σ	calculated	206Pb/204Pb	207Pb/235U	1σ	1σ %	206Pb/238U	1σ	1σ %	Rho	208Pb/232Th	1σ	207Pb/206Pb	2σ	206Pb/238U	2σ	207Pb/235U	2σ	208Pb/232Th	2σ
Spot107.FIN2	0.200214	153.9	7.9	189	8.4	145.1	7.1	1.22807	9340	5.42	0.12	2.21402	0.3464	0.0074	2.13626	0.47101	0.0765	0.0022	1773	26	1910	35	1884	19	1410	130	107.727
Spot108.FIN2	0.863741	38.8	2.3	59.3	4.3	44.7	3.5	1.52835	2165	5.19	0.21	4.04624	0.327	0.011	3.36391	0.37522	0.078	0.0045	1900	50	1806	54	1834	36	1070	470	95.0526
Spot109.FIN2	0.374749	83.7	3.4	107	3	81.3	2.9	1.27838	4990	5.39	0.14	2.5974	0.3373	0.0075	2.22354	0.37463	0.077	0.0026	1835	28	1865	36	1875	22	1400	170	101.635
Spot110.FIN2	0.269065	117.8	4.8	207.4	7.9	150.1	6.9	1.76061	6950	5.22	0.13	2.49042	0.3407	0.0076	2.2307	0.4733	0.0709	0.0021	1773	27	1894	37	1852	21	1400	110	106.825
Spot111.FIN2	0.162186	397	10	1147	23	273.4	9.2	2.88917	11530	2864	0.08	0.0027933	0.1642	0.0047	2.86236	0.55141	0.02272	0.00073	1976	28	980	25	1364	21	416	26	49.5951
Spot112.FIN2	0.148002	224.2	9.2	382	15	275	12	1.70384	12635	5.09	0.11	2.1611	0.3286	0.0063	1.91722	0.42551	0.0681	0.0016	1760	23	1825	31	1832	18	1290	62	103.693
Spot114.FIN2	0.348881	94.3	4.1	176.8	8.2	136.3	7.1	1.87487	5360	5.15	0.17	3.30097	0.3336	0.0095	2.84772	0.46184	0.0707	0.0027	1748	36	1852	46	1826	28	1570	170	105.95
Spot115.FIN2	0.478873	68.1	3.2	106.2	6.1	77.8	4.7	1.55947	3905	5.04	0.15	2.97619	0.3338	0.009	2.69623	0.37239	0.0754	0.0033	1758	36	1847	43	1816	24	1050	320	105.063
Spot116.FIN2	0.254422	131	5.4	252.6	9.9	193.5	8.5	1.92824	7350	5.1	0.13	2.54902	0.3364	0.0078	2.31867	0.50576	0.0753	0.0021	1766	27	1857	37	1834	21	1410	110	105.153
Spot118.FIN2	0.400857	82.7	3	111.7	4.6	84.2	4.1	1.35067	4665	5.27	0.14	2.65655	0.3408	0.0083	2.43545	0.37043	0.0754	0.0028	1811	30	1878	40	1850	23	1110	220	103.7
Spot119.FIN2	0.23201	147.9	5.7	233.7	7	173.6	6	1.58012	8060	5.01	0.11	2.19561	0.3296	0.0068	2.06311	0.42275	0.0752	0.0021	1746	26	1831	32	1819	18	1390	89	104.868
Spot120.FIN2	0.204932	265.9	5.9	655	11	251.6	6.8	2.46333	9125	3215	0.081	0.00251944	0.2027	0.0052	2.56537	0.4912	0.0395	0.0011	1822	26	1188	27	1458	20	752	40	65.2031
Spot121.FIN2	0.914425	39.4	1.4	72.6	2.5	59.2	3.2	1.84264	2045	5.17	0.24	4.64217	0.326	0.013	3.98773	0.31801	0.0742	0.0038	1933	61	1809	65	1839	40	1440	280	93.5851
Spot122.FIN2	0.0944444	355	15	540	29	323	19	1.52113	19800	5233	0.093	0.00177718	0.3388	0.0058	1.71192	0.54923	0.0582	0.0012	1750	17	1880	28	1850	15	1161	49	107.429
Spot123.FIN2	0.332444	106.7	2.6	198.5	7.6	146.2	6	1.86036	5625	4.96	0.13	2.62097	0.3178	0.0076	2.39144	0.49878	0.0776	0.0025	1785	30	1774	37	1806	22	1460	120	99.3838
Spot124.FIN2	0.763265	45.6	1.6	111	2.3	61.6	2.4	2.43421	2450	5.32	0.19	3.57143	0.344	0.012	3.48837	0.38784	0.0533	0.0022	1868	38	1886	55	1865	31	790	190	100.964
Spot125.FIN2	0.227356	142.8	3.7	205.6	4.6	160.7	4.9	1.43978	8225	5.78	0.14	2.42215	0.3506	0.0082	2.33885	0.47692	0.0749	0.0024	1908	23	1930	39	1939	21	1408	98	101.153
Spot126.FIN2	0.358925	97.2	4.2	131.8	5.9	107	5.4	1.35597	5210	5.21	0.13	2.4952	0.3351	0.0081	2.41719	0.44338	0.0826	0.0031	1831	27	1854	39	1850	21	1540	190	101.256
Spot127.FIN2	0.307819	115	4.7	95.3	3.9	81.5	4.7	0.828696	6075	5.16	0.15	2.90698	0.3307	0.0084	2.54007	0.38323	0.0791	0.0037	1820	32	1837	41	1838	25	1670	270	100.934
Spot128.FIN2	0.344383	102.4	5.7	104.7	5.4	76.1	4.6	1.02246	5430	5.31	0.16	3.01318	0.3312	0.0096	2.89855	0.47107	0.0754	0.0033	1850	33	1848	45	1859	24	1480	270	99.8919
Spot129.FIN2	0.217822	158.2	6.9	210.2	8.3	161.3	7.6	1.3287	8585	5.38	0.12	2.23048	0.345	0.0073	2.11594	0.5134	0.0772	0.0023	1790	23	1909	35	1875	19	1620	110	106.648
Spot130.FIN2	0.540462	64.4	2.7	96.1	3.8	75	3.4	1.49224	3460	5.28	0.16	3.0303	0.3485	0.0094	2.69727	0.36493	0.0811	0.0036	1791	36	1914	44	1855	26	1360	240	106.868
Spot131.FIN2	0.220779	196.4	5.6	478	16	225.2	9.6	2.43381	8470	4.13	0.12	2.90557	0.2614	0.0075	2.86917	0.51394	0.0512	0.0017	1837	32	1490	38	1651	24	998	63	81.1105
Spot133.FIN2	0.246377	144.7	5.8	253.4	9.4	184.5	7.5	1.75121	7590	5.31	0.12	2.25989	0.339	0.0072	2.12389	0.419	0.0736	0.002	1804	25	1884	35	1864	19	1445	89	104.435
Spot134.FIN2	0.300885	124.5	6.1	227	10	165.8	9	1.82329	6215	5.07	0.13	2.5641	0.3262	0.0076	2.32986	0.45574	0.071	0.002	1790	27	1814	37	1817	21	1350	120	101.341
Spot135.FIN2	0.561562	64	2.5	108.3	3.9	85	3.8	1.69219	3330	5.22	0.15	2.87356	0.344	0.0096	2.7907	0.42164	0.0778	0.0029	1814	35	1894	46	1840	24	1470	210	104.41
Spot136.FIN2	0.41326	89.7	3.6	150.8	3.9	104.3	3.8	1.68116	4525	4.94	0.14	2.83401	0.3303	0.0085	2.57342	0.36905	0.0701	0.0024	1758	33	1833	41	1807	24	1460	130	104.266
Spot137.FIN2	0.346296	108.7	4.9	148.5	6.3	107.8	5.2	1.36615	5400	5.06	0.14	2.7668	0.3316	0.0081	2.4427	0.50336	0.074	0.0027	1781	29	1833	39	1815	22	1320	210	102.92
Spot138.FIN2	0.652705	57.4	2.9	137.3	6.7	102.8	5.5	2.39199	2865	5.11	0.17	3.32681	0.3273	0.0094	2.87198	0.42296	0.0752	0.0028	1864	37	1816	44	1819	29	1450	170	97.4249
Spot140.FIN2	0.477041	75	1.8	183.1	5.4	127.3	4.3	2.44133	3920	5.21	0.14	2.68714	0.3386	0.0087	2.5694	0.41028	0.0714	0.0022	1788	35	1867	41	1850	23	1502	93	104.418
Spot141.FIN2	0.316145	118.8	5.6	139.4	6.8	102.6	5.5	1.1734	5915	5.02	0.13	2.58964	0.3274	0.0077	2.35186	0.3686	0.0754	0.0032	1788	29	1820	36	1809	22	1530	230	101.79
Spot142.FIN2	0.330097	108.9	3.5	142.5	3.3	101.2	3.2	1.30854	5665	5.27	0.13	2.46679	0.3438	0.0077	2.23967	0.52462	0.0733	0.0026	1763	26	1900	37	1866	22	1500	130	107.771
Spot143.FIN2	0.301613	125.5	5.6	204	10	123.7	6.5	1.6255	6200	4.96	0.12	2.41935	0.3261	0.0074	2.26924	0.41732	0.0634	0.0024	1744	27	1812	36	1806	20	1250	150	103.899
Spot144.FIN2	0.609121	61.2	3.2	116.1	7.5	76.4	5.6	1.89706	3070	5.01	0.21	4.19162	0.338	0.012	3.5503	0.28066	0.063	0.0036	1772	44	1873	58	1813	35	1160	280	105.7
Spot145.FIN2	0.421171	84.4	3.8	170.1	5.9	114.2	4.6	2.0154	4440	5.06	0.14	2.7668	0.3413	0.0087	2.54908	0.43294	0.0688	0.0023	1748	30	1886	41	1823	24	1110	150	107.895
Spot146.FIN2	0.840449	44.8	1.1	78.9	1.6	56.8	2.2	1.76116	2225	5.23	0.17	3.25048	0.328	0.01	3.04878	0.47945	0.0713	0.0032	1888	35	1825	49	1841	28	1210	240	96.6631
Spot147.FIN2	0.174685	214.8	9.6	324	14	217	10	1.50838	10705	5.14	0.11	2.14008	0.3289	0.0067	2.03709	0.48679	0.0699	0.0019	1796	23	1824	32	1837	17	1237	89	101.559
Spot148.FIN2	0.167563	352.1	8.2	535	12	190.8	5.7	1.51945	11160	3120	0.087	0.00278846	0.1965	0.0053	2.6972	0.50258	0.0393	0.0012	1786	27	1151	29	1432	21	775	49	64.4457
Spot149.FIN2	0.305057	122.5	7.1	209	11	117	7	1.70612	6130	5.28	0.14	2.65152	0.3403	0.0076	2.23332	0.40209	0.0551	0.002	1796	29	1886	36	1855	22	920	160	105.011
Spot150.FIN2	0.389583	93.6	3.4	179.6	6.1	123	5.3	1.9188	4800	5.35	0.15	2.80374	0.3412	0.0081	2.37397	0.36922	0.0705	0.0023	1827	31	1885	39	1866	22	1240	120	103.175
Spot151.FIN2	0.199786	179.4	4.6	290.7	7.3	200.4	6.1	1.6204	9360	5.13	0.11	2.14425	0.3353	0.0071	2.11751	0.51037	0.0716	0.002	1756	22	1855	34	1837	18	1348	66	105.638
Spot152.FIN2	0.332149	105.5	5.3	178.7	8.7	134.4	7.1	1.69384	5630	5.12	0.15	2.92969	0.3388	0.0086	2.53837	0.41374	0.0737	0.0025	1765	33	1875	41	1830	25	1490	120	106.232
Spot153.FIN2	0.443128	84.8	3.9	185.2	8.3	106.7	5.1	2.18396	4220	5.27	0.14	2.65655	0.3347	0.0085	2.53959	0.36189	0.0609	0.0024	1840	31	1850	41	1853	23	830	200	100.543
Spot154.FIN2	0.312448	120.4	7.6	259	17	171	12	2.15116	5985	5.18	0.15	2.89575	0.3326	0.009	2.70595	0.31403	0.0698	0.0027	1815	34	1837	43	1839	25	1380	240	101.212
Spot155.FIN2	0.222619	181	14	346	18	179	14	1.9116	8400	4.8	0.15	3.125	0.3173	0.0081	2.55279	0.45514	0.0451	0.0016	1762	28	1765	39	1778	24	856	78	100.17
Spot156.FIN2	0.236709	258.6	7	1038	33	254.4	7.6	4.01392	7900	3261	0.082	0.00251457	0.1934	0.0045	2.32678	0.51968	0.02665	0.00083	1904	25	1137	24	1461	19	470	28	59.7164
Spot157.FIN2	0.364522	107.3	4.4	212.1	7.9	138.6	6.2	1.9767	5130	4.93	0.13	2.63692	0.3165	0.0073	2.30648	0.40953	0.0673	0.0024	1789	30	1764	36	1802	21	1200	120	98.6026
Spot158.FIN2	0.210586	178.2	7.3	464	19	244	10	2.60382	8880	5.04	0.11	2.18254	0.3228	0.0067	2.07559	0.49715	0.0565	0.0017	1774	25	1796	32	1820	18	1057	62	101.24
Spot159.FIN2	0.34	110.9	4.7	164.7	6.5	106.5	4.6	1.48512	5500	4.98	0.14	2.81124	0.3307	0.0083	2.50983	0.4408	0.0667	0.0025	1747	33	1830	40	1805	24	880	180	104.751
Spot160.FIN2	0.307819	121.5	4.3	206.8	5.4	140.8	4.9	1.70206	6075	5.21	0.13	2.4952	0.3332	0.0078	2.34094	0.47914	0.0696	0.002	1798	26	1845	37	1843	21	1295	89	102.614
Spot161.FIN2	0.289698	131.7	4.2	229.8	6.8	130.8	4.9	1.74487	6455	4.92	0.13	2.64228	0.3313	0.0083	2.50528	0.43779	0.0548	0.0019	1692	30	1843	39	1800	22	1104	87	108.924
Spot162.FIN2	0.326353	119	5.7	265	14	172.1	9.4	2.22689	5730	5.03	0.12	2.38569	0.3241	0.0075	2.3141	0.34102	0.0674	0.0021	1783	30	1804	36	1815	21	1190	140	101.178
Spot163.FIN2	0.216435	193.5	9.8	288	12	170.4	6.8	1.48837	8640	4557	0.092	0.00201887	0.2929	0.0057	1.94606	0.45579	0.0581	0.0016	1805	20	1655	28	1738	17	1046	74	91.6898
Spot164.FIN2	0.600321	64.9	2.4	184	6.5	115.2	4.5	2.83513	3115	5.09	0.16	3.14342	0.3235	0.009	2.78207	0.43871	0.0644	0.0022	1831	35	1801	43	1822	27	1140	120	98.3616
Spot165.FIN2	0.219871	184.8	5.5	358	11	164	5	1.93723	8505	4.85	0.11	2.26804	0.3019	0.0073	2.41802	0.4086	0.0447	0.0014	1816	28	1695	36	1786	20	824	62	93.337
Spot166.FIN2	0.32807	114	4.2	267	12	157.4	6.8	2.34211	5700	5.25	0.13	2.47619	0.3368	0.0076	2.25653	0.44023	0.0636	0.0021	1807	27	1869	36	1852	21	1260	100	103.431
Spot168.FIN2	0.407852	94.1	3.9	127.3	4.9	89.6	4.1	1.35282	4585	5.19	0.14	2.6975	0.329	0.0084	2.55319	0.38978	0.0733	0.0027	1832	29	1827	40	1838	22	1060	170	99.7271
Spot169.FIN2	0.337545	111.4	2.8	85.3	3	59.1	2.7	0.765709	5540	5.23	0.13	2.48566	0.3354	0.0076	2.26595	0.42828	0.0714	0.0031	1766	27	1854	37	1843	22	1280	250	104.983
Spot170.FIN2	0.21606	178.9	7.3	260	12	164.5	7.6	1.45333	8655	5.03	0.11	2.18688	0.3314	0.0066	1.99155	0.42267	0.0647	0.002	1738	25	1837	32	1818	18	1180	120	105.696
Spot171.FIN2	0.238217	159.4	6.1	252.6	8	170.2	5.7	1.58469	7850	5.11	0.11	2.15264	0.3326	0.007	2.10463	0.41702	0.0697	0.002	1759	24	1850	34	1831	19	1345	88	105.173
Spot172.FIN2	0.394931	96.5	4.6	135	6.8	91.9	4.9	1.39896	4735	5.16	0.15	2.90698	0.3361	0.0088	2.61827	0.41437	0.0762	0.0037	1808	33	1857	42	1841	23	1580	270	102.71
Spot173.FIN2	0.237762	154.7	4.9	126.1	3.2	83	3	0.815126	7865	5.73	0.13	2.26876	0.3439	0.0074	2.15179	0.48599	0.0677	0.0026	1897	23	1894	35	1928	20	1470	150	99.8419
Spot174.FIN2	0.410538	90.4	2.7	147.9	4.1	102.3	3.8	1.63606	4555	5.11	0.13	2.54403	0.3322	0.0074	2.22757	0.38588	0.0694	0.0024	1765	28	1849	35	1827	22	1410	120	104.759
Spot175.FIN2	0.232443	159.4	2.9	184.8	3.7	127.6	3.5	1.15935	8045	5.22	0.11	2.10728	0.3351	0.0068	2.02925	0.44666	0.0698	0.0022	1771	24	1863	32	1850	18	1290	110	105.195
Spot176.FIN2	0.373626	101.1	3.1	215.6	7.5	150.9	5.8	2.13254	5005	5.15	0.13	2.52427	0.3326	0.0077	2.31509	0.47915	0.0705	0.0022	1749	26	1846	37	1842	22	1250	110	105.546
Spot177.FIN2	0.345018	113.6	4.6	191.5	8.6	132.9	6.1	1.68574	5420	5.16	0.13	2.51938	0.3268	0.0072	2.20318	0.36068	0.0705	0.0024	1766	30	1814	35	1829	22	1200	150	102.718
Spot178.FIN2	0.624374	62	1.4	91.9	1.7	62.3	2.1	1.48226	2995	5.22	0.16	3.06513	0.3277	0.0088	2.68538	0.3659	0.0684	0.0027	1877	34	1820	42	1839	25	1200	200	96.9632
Spot179.FIN2	0.317487	119	3.1	190.2	3.6	126.6	3.7	1.59832	5890	5.29	0.12	2.26843	0.3286	0.0071	2.16068	0.43787	0.0661	0.0019	1819	24	1826	34	1862	20	1203	97	100.385
Spot180.FIN2	1.04762	37.9	1.7	45	2.2	32.1	2.4	1.18734	1785	5.16	0.27	5.23256	0.325	0.015	4.61538	0.34552	0.0704	0.0057	1869	63	1789	72	1812	44	1410	570	95.7196
Spot181.FIN2	0.671454	58	1.7	101.5	2.6	63.3	2.4	1.75	2785	5.19	0.17	3.27553	0.3237	0.0092	2.84214	0.40619	0.0629	0.0027	1850	35	1802	45	1834	28	920	210	97.4054
Spot182.FIN2	0.182706	212.7	8	358	10	235.3	7.4	1.68312	10235	5.21	0.11	2.11132	0.3331	0.0065	1.95137	0.49161	0.0663	0.0018	1756	21	1847	31	1854	17	1239	62	105.182
Spot183.FIN2	0.404762	101.2	3.3	216	7.5	141.2	5.4	2.13439	4620	5	0.14	2.8	0.3242	0.0074	2.28254	0.39779	0.0665	0.0021	1777	29	1802	36	1811	23	1249	99	101.407
Spot184.FIN2	0.652705	59.8	1.9	83.9	2.3	59.8	2.4	1.40301	2865	5.17	0.16	3.09478	0.336	0.0095	2.82738	0.38776	0.0737	0.0032	1795	35	1847	45	1832	27	1190	230	102.897
Spot185.FIN2	0.17235	268	14	155.2	9.5	89.8	6.1	0.579104	10850	4233	0.094	0.00222065	0.2704	0.0065	2.40385	0.54253	0.0562	0.0024	1795	23	1538	32	1681	18	1010	190	85.6825
Spot186.FIN2	0.485084	83.7	2.5	208.3	6.9	142.9	5.3	2.48865	3855	5.13	0.15	2.92398	0.32	0.0087	2.71875	0.35756	0.0672	0.0022	1854	34	1779	42	1836	24	1321	98	95.9547
Spot187.FIN2	0.367748	106.9	2.6	161.7	4.2	90.8	3.3	1.51263	5085	5.14	0.13	2.52918	0.3348	0.0072	2.15054	0.39292	0.057	0.0019	1760	28	1858	34	1827	21	1020	130	105.568
Spot188.FIN2	0.660777	64.1	1.9	97.2	2.6	57.5	2.8	1.51638	2830	4.87	0.2	4.10678	0.32	0.012	3.75	0.33282	0.0564	0.003	1823	50	1777	58	1790	34	1030	200	97.4767
Spot189.FIN2	0.200859	212.5	6.5	529	14	313.5	8.3	2.48941	9310	4.72	0.1	2.11864	0.3076	0.0061	1.98309	0.50908	0.0598	0.0015	1718	23	1726	30	1765	18	1099	44	100.466
Spot191.FIN2	0.206288	198.3	6	479	12	248	7.9	2.41553	9065	5028	0.098	0.00194909	0.3184	0.0062	1.94724	0.45303	0.0508	0.0013	1775	23	1775	30	1823	17	958	44	100
Spot192.FIN2	0.377016	107.5	4.6	138.8	6.9	96.5	5.4	1.29116	4960	5.04	0.13	2.57937	0.3228	0.007	2.16853	0.41385	0.0682	0.0027	1787	30	1797	34	1810	21	1120	200	100.56
Spot193.FIN2	0.23852	165.4	7.6	386	16	255	11	2.33374	7840	5.12	0.12	2.34375	0.3347	0.0072	2.15118	0.50061	0.0682	0.0017	1740	24	1852	34	1834	20	1253	68	106.437
Spot194.FIN2	0.185149	213.9	7.3	315.2	9.9	214.1	7.1	1.47359	10100	5.16	0.11	2.13178	0.3316	0.0066	1.99035	0.50928	0.0682	0.0018	1749	23	1849	32	1840	18	1246	69	105.718
Spot195.FIN2	0.26338	145.4	4.2	277.1	7.7	180.8	6	1.90578	7100	5.35	0.12	2.24299	0.3401	0.0071	2.08762	0.52407	0.0654	0.0017	1769	22	1884	34	1866	19	1248	66	106.501
Spot196.FIN2	0.398721	99.3	2.7	215.4	5.5	145.3	4.7	2.16918	4690	5.05	0.13	2.57426	0.3276	0.0071	2.16728	0.36797	0.0685	0.002	1741	29	1822	34	1810	21	1296	88	104.652
Spot197.FIN2	0.43237	92.5	2.6	223.8	4.8	143	4.7	2.41946	4325	5.05	0.14	2.77228	0.3216	0.0074	2.301	0.34749	0.0635	0.0018	1781	31	1792	36	1821	23	1246	82	100.618
Spot198.FIN2	0.25	160.3	5.2	271.3	7.5	164.4	6	1.69245	7480	4.91	0.11	2.24033	0.3209	0.0062	1.93207	0.40371	0.0612	0.0018	1725	25	1794	30	1802	19	1202	75	104
Spot199.FIN2	0.533524	75.1	3.4	195.9	6.3	124.8	5	2.60852	3505	5.04	0.15	2.97619	0.3261	0.0082	2.51457	0.44217	0.0642	0.002	1777	33	1810	39	1804	24	1170	100	101.857
Spot200.FIN2	0.0907767	434	14	563	11	354	12	1.29724	20600	4.93	0.1	2.0284	0.3318	0.0071	2.13984	0.52067	0.0572	0.0015	1699	22	1852	35	1810	17	1088	44	109.005
Spot201.FIN2	0.414175	93.6	1.8	117.3	5.5	76.6	4	1.25321	4515	5.07	0.13	2.5641	0.3287	0.0076	2.31214	0.40292	0.0674	0.0026	1778	28	1831	37	1825	22	1010	190	102.981
Spot202.FIN2	0.620232	62	2	81	2.2	56.7	2.2	1.30645	3015	5.15	0.16	3.1068	0.3374	0.0094	2.78601	0.39871	0.0729	0.0033	1776	35	1863	45	1830	26	1240	240	104.899
Spot203.FIN2	0.242385	163.3	6.7	251	12	168.3	8.1	1.53705	7715	5.2	0.11	2.11538	0.3337	0.0066	1.97782	0.4489	0.0676	0.002	1783	23	1848	32	1849	18	1224	96	103.646
Spot204.FIN2	0.250167	166.2	4.7	431	16	267.7	9.5	2.59326	7475	5.04	0.11	2.18254	0.3143	0.007	2.22717	0.45919	0.0614	0.0014	1819	25	1752	34	1819	18	1105	50	96.3167
Spot205.FIN2	0.372139	108.9	5	149.3	5.7	87.2	4.3	1.37098	5025	4.95	0.12	2.42424	0.3233	0.0074	2.2889	0.35336	0.059	0.0023	1744	29	1796	36	1796	21	1020	150	102.982
Spot206.FIN2	0.2427	161.8	2.6	230.2	4.4	151.8	4.3	1.42274	7705	5.05	0.1	1.9802	0.3253	0.0065	1.99816	0.47962	0.0669	0.002	1739	24	1812	32	1822	17	1186	88	104.198
Spot207.FIN2	0.539683	83.5	3.5	157.7	6.4	87.2	4.2	1.88862	3465	4.38	0.13	2.96804	0.2906	0.0075	2.58087	0.33527	0.0538	0.002	1767	35	1637	37	1698	25	980	150	92.6429
Spot208.FIN2	0.228606	174.5	5.6	302.6	9.2	200.5	7.4	1.7341	8180	5.08	0.11	2.16535	0.3209	0.0061	1.9009	0.44494	0.0677	0.0018	1782	23	1793	30	1825	18	1289	72	100.617
Spot209.FIN2	0.508152	74.1	2.7	126.2	4.6	90.8	4.1	1.7031	3680	5.47	0.16	2.92505	0.3395	0.0093	2.73932	0.36	0.0713	0.0027	1838	37	1880	45	1888	25	1040	210	102.285
Spot210.FIN2	0.114024	332	14	322	13	225	11	0.96988	16400	5227	0.096	0.00183662	0.3301	0.0059	1.78734	0.57974	0.0672	0.0018	1761	18	1838	28	1854	15	1287	68	104.373
Spot211.FIN2	0.266003	144.3	5.1	220.8	6.8	147.5	5.4	1.53015	7030	5.19	0.12	2.31214	0.3384	0.0068	2.00946	0.36507	0.0655	0.0019	1723	27	1878	32	1841	19	1181	92	108.996
Spot212.FIN2	0.111642	374	12	382	14	216.6	8.1	1.02139	16750	4764	0.079	0.00165827	0.3004	0.0055	1.83089	0.52447	0.056	0.0015	1755	20	1686	27	1778	14	1076	55	96.0684
Spot213.FIN2	0.313495	127.1	4.5	192.9	5.6	128.9	4.5	1.5177	5965	5.15	0.12	2.3301	0.3258	0.0069	2.11786	0.44385	0.0677	0.0022	1766	25	1815	33	1843	20	1270	110	102.775
Spot214.FIN2	0.484456	79.1	3.5	181.2	8.2	117.6	6.2	2.29077	3860	5.12	0.15	2.92969	0.3347	0.0084	2.50971	0.33118	0.0649	0.0023	1738	34	1861	41	1815	25	1200	150	107.077
Spot215.FIN2	0.335426	112.3	4.2	176.9	7.9	93.1	4.4	1.57524	5575	5.22	0.13	2.49042	0.3424	0.0071	2.0736	0.34108	0.0525	0.0021	1718	28	1892	34	1845	21	840	130	110.128
Spot216.FIN2	0.298246	131.8	4.5	200.7	5.7	142.6	5.1	1.52276	6270	5.21	0.12	2.30326	0.3347	0.0067	2.00179	0.39647	0.0714	0.0022	1750	27	1862	32	1853	19	1220	100	106.4
Spot217.FIN2	0.381633	105.5	4.3	122.5	4.4	84.9	3.8	1.16114	4900	5.1	0.13	2.54902	0.3323	0.0079	2.37737	0.43959	0.0688	0.0025	1723	30	1849	38	1829	21	1200	180	107.313
Spot219.FIN2	0.24036	167.6	5.6	233.3	6.9	153.4	5.4	1.392	7780	5.19	0.11	2.11946	0.3283	0.007	2.1322	0.41998	0.0665	0.0019	1757	26	1823	34	1847	18	1216	86	103.756
Spot220.FIN2	0.273993	141.1	5.7	184.6	6.4	127.3	5.1	1.30829	6825	5.28	0.12	2.27273	0.341	0.0068	1.99413	0.41624	0.0695	0.0022	1734	25	1887	33	1852	19	1260	120	108.824
Spot221.FIN2	0.415556	95.4	2.7	181.7	3.9	115	4.1	1.90461	4500	5.05	0.14	2.77228	0.3204	0.0083	2.59051	0.43365	0.065	0.0022	1752	33	1783	41	1818	24	1160	110	101.769
Spot222.FIN2	0.38517	104	4.3	167.6	7.5	112.2	5.4	1.61154	4855	5.2	0.13	2.5	0.3365	0.0083	2.46657	0.40878	0.0698	0.0025	1757	30	1863	39	1851	21	1190	150	106.033
Spot223.FIN2	0.758621	52.4	1.5	105.1	3.2	47.4	2.4	2.00573	2465	5.16	0.17	3.29457	0.3331	0.0093	2.79195	0.42123	0.0454	0.0021	1786	37	1847	45	1829	29	560	190	103.415
Spot224.FIN2	0.245085	156.4	4	246	12	167.8	9.3	1.57289	7630	5.45	0.13	2.38532	0.3486	0.0084	2.40964	0.39306	0.0654	0.0023	1775	27	1925	39	1896	21	1120	110	108.451
Spot226.FIN2	0.21023	195.5	7.9	226.2	9.3	154.6	6.8	1.15703	8895	5.06	0.11	2.17391	0.3266	0.0061	1.86773	0.46249	0.069	0.0022	1699	24	1819	29	1823	18	1140	120	107.063
Spot227.FIN2	0.177419	255.3	9.9	255.9	8.6	102.3	5.7	1.00235	10540	4700	0.095	0.00202128	0.2909	0.0058	1.99381	0.49637	0.0388	0.0014	1780	21	1644	29	1763	17	615	82	92.3596
Spot228.FIN2	0.800857	52.6	1.8	83.7	2.8	53.3	2.5	1.59125	2335	5.08	0.17	3.34646	0.323	0.01	3.09598	0.38311	0.0662	0.003	1815	41	1793	50	1801	29	730	290	98.7879
Spot230.FIN2	0.552437	72.1	2.2	97.7	3.5	64.5	3.1	1.35506	3385	5.11	0.15	2.93542	0.3282	0.0083	2.52895	0.4127	0.0677	0.0028	1759	35	1824	40	1829	25	1010	220	103.695
Spot231.FIN2	0.4675	85.5	2.9	116.3	3.9	75.2	3.2	1.36023	4000	5.16	0.14	2.71318	0.3347	0.0083	2.47983	0.39091	0.0666	0.0025	1756	31	1855	39	1832	24	1030	170	105.638
Spot234.FIN2	0.308326	132.2	5.6	301	12	197.7	8.7	2.27685	6065	5.09	0.13	2.55403	0.3291	0.0072	2.18778	0.34123	0.067	0.002	1743	31	1839	35	1817	22	1279	84	105.508
Spot235.FIN2	0.344383	118.8	5.8	389	16	212	11	3.27441	5430	4.94	0.14	2.83401	0.3281	0.0094	2.86498	0.32494	0.0513	0.0014	1741	33	1827	45	1807	24	870	110	104.94
Spot236.FIN2	1.32296	30.8	0.96	83.1	2.4	51.9	2.3	2.69805	1413.5	4.93	0.22	4.46247	0.329	0.012	3.64742	0.39999	0.0652	0.0028	1772	52	1812	58	1784	39	830	250	102.257
Spot238.FIN2	0.659612	60.5	2.2	109.7	3.9	69.9	3	1.81322	2835	5.2	0.18	3.46154	0.3364	0.0094	2.79429	0.48657	0.0662	0.0028	1749	38	1859	45	1828	28	960	220	106.289
Spot239.FIN2	0.175752	228	10	403	17	272	11	1.76754	10640	5.09	0.11	2.1611	0.3371	0.0062	1.83922	0.39378	0.0694	0.0018	1661	23	1865	30	1833	18	1312	59	112.282
Spot240.FIN2	0.168468	235	12	437	23	303	18	1.85957	11100	5.07	0.1	1.97239	0.3335	0.0062	1.85907	0.38261	0.0682	0.0017	1689	23	1855	30	1824	17	1322	61	109.828
Spot243.FIN2	0.303818	135.5	4.2	300.7	6.3	176.6	5.7	2.21919	6155	5	0.13	2.6	0.3259	0.0078	2.39337	0.44355	0.0571	0.0017	1704	30	1812	38	1815	22	1099	70	106.338
Spot244.FIN2	0.494055	83.9	3.3	128.2	5.3	87.8	4.4	1.52801	3785	5.16	0.14	2.71318	0.3272	0.0083	2.53667	0.32956	0.0691	0.0028	1789	32	1817	40	1834	24	1110	190	101.565
Spot246.FIN2	0.45006	94.3	3.4	182.2	5.1	104.5	4.1	1.93213	4155	4.94	0.14	2.83401	0.3199	0.0076	2.37574	0.4526	0.0621	0.0022	1716	31	1789	37	1792	24	1050	150	104.254
Spot247.FIN2	0.181553	236	12	1051	39	451	24	4.45339	10300	4940	0.093	0.00188259	0.3151	0.006	1.90416	0.47572	0.04212	0.00089	1751	23	1766	29	1806	16	808	31	100.857
Spot248.FIN2	0.419753	98.2	3.9	201	8	127.1	5.8	2.04684	4455	5.02	0.14	2.78884	0.3258	0.0078	2.39411	0.41632	0.0657	0.0023	1720	30	1812	38	1813	24	1140	130	105.349
Spot249.FIN2	0.196842	213.6	6	121.9	5.1	67.9	3.4	0.570693	9500	5.02	0.1	1.99203	0.3228	0.0057	1.7658	0.40475	0.0597	0.0027	1720	22	1804	28	1817	17	980	220	104.884
1 data not corrected for common-Pb
2 Concordance calculated as (206Pb-238U age/207Pb-206Pb age)*100
f206c = the proportion of the 206Pb ion beam that is common, calculated as (206Pb204Pbmodel/206Pb204Pb measured)* 100
where 206Pb204Pb measured = (Stacey and Kramers, 1975) 206Pb/204Pb ratio at the apparent (non-common Pb corrected) 207Pb/206Pb age
	Grains excluded from the analysis due Pb loss

## Sheet: LM16
Spot	Isotopic Ratios													Ages (Ma)1
	U (ppm)	Th (ppm)	204Pb/206Pb	1σ %	%206Pbc	206Pb/238U	1σ %	207Pb/206Pb	1σ %	208Pb/206Pb	1σ %	238U/206Pb	1σ %	207Pb/206Pb	1σ %	206Pb/238U	1σ %	%Dis.
LM16-01	367.779	169.243	0.00040433	12.794	6.32023	0.598571	1.59532	0.117891	0.537786	0.234401	1.20539	7.1336	1.75154	1838.54	15.3572	840.103	13.8148	57.8242
LM16-02	416.217	242.141	0.000776108	18.3179	6.27646	0.451277	2.0244	0.12256	0.581169	0.28036	0.75349	5.99651	3.16764	1832.24	33.7817	981.958	28.9397	49.9472
LM16-03	306.51	199.23	0.000187144	18.1064	4.01709	0.767707	1.73399	0.114337	0.53525	0.257763	0.69823	4.66656	1.14413	1828.74	12.4631	1248.08	12.9984	34.8741
LM16-04	212.975	149.634	0.000454011	18.5424	4.15223	0.456569	0.478311	0.118727	0.822849	0.288582	1.0403	4.36364	1.21768	1841.13	24.3737	1321.08	14.6418	31.1962
LM16-05	284.043	259.324	0.000343083	16.887	3.49427	0.519617	2.22191	0.114129	0.641755	0.401886	0.687444	4.3113	1.46826	1790.28	18.0312	1337.82	17.7766	27.9523
LM16-06	236.744	203.12	0.000226484	18.9373	1.20357	0.536088	0.396746	0.112315	0.662241	0.310288	0.78973	3.36649	1.17225	1786.66	15.829	1671.34	17.2877	7.32465
LM16-07	404.89	339.693	9.23722e-05	23.571	1.07909	0.547414	0.664382	0.111743	0.528761	0.264878	0.67404	3.34989	1.12493	1807.45	10.8862	1681.78	16.6602	7.89546
LM16-08	155.27	122.398	0.000139999	22.9426	0.675913	1.03926	1.95121	0.11276	0.631165	0.232157	0.858849	3.19103	1.24034	1813.57	13.7025	1753.94	19.0622	3.755
LM16-09	280.54	237.195	0.00139111	7.17597	1.03997	1.00714	0.438376	0.116172	0.579298	0.255238	0.76429	3.17069	1.21783	1567.15	30.252	1733.4	18.6687	-12.1054
LM16-10	187.606	262.785	0.000106868	26.7271	0.725222	0.775883	2.19456	0.114924	0.638301	0.420319	1.16788	3.12941	1.20777	1855.85	13.2229	1784.92	18.8435	4.37458
LM16-11	235.751	366.362	5.93564e-05	28.8681	0.645365	0.991581	2.30091	0.114348	0.516042	0.44944	0.524235	3.12789	1.17082	1856.92	10.0965	1786.84	18.2763	4.32019
LM16-12	119.642	141.556	-9.30419e-06	100	0.550437	1.01652	2.13325	0.114051	0.708054	0.335893	0.817081	3.11318	1.28753	1866.93	12.915	1795.89	20.1825	4.35871
LM16-13	168.099	164.494	7.55154e-06	100	0.547368	0.869439	1.74973	0.114586	0.6366	0.296343	0.779001	3.09481	1.22075	1871.78	11.6044	1804.77	19.2173	4.10327
LM16-14	120.149	98.7221	5.89572e-05	40.8256	0.497445	0.924899	1.79626	0.11483	0.722543	0.241867	0.974074	3.07441	1.28517	1864.67	14.1186	1813.94	20.3282	3.12061
LM16-15	106.381	136.646	0.000102068	31.6239	0.351305	0.993072	1.78705	0.113595	0.739917	0.376651	0.815093	3.07767	1.30868	1835.57	15.3159	1811.21	20.6794	1.52228
LM16-16	150.99	140.605	2.24425e-05	57.7355	0.294623	1.0257	1.79936	0.113257	0.635524	0.272222	0.807799	3.07441	1.24393	1847.47	11.8671	1814.84	19.6785	2.02636
LM16-17	133.821	169.019	6.28582e-05	37.7972	0.306814	0.89585	0.49374	0.113789	0.693929	0.382749	0.755114	3.06055	1.25889	1847.24	13.6667	1821	19.9797	1.62988
LM16-18	196.04	166.076	9.8396e-05	24.2544	0.301152	1.01665	2.40547	0.113752	0.558883	0.245412	0.741692	3.06034	1.58701	1838.91	11.5022	1820.24	25.1741	1.16529
LM16-19	67.0356	102.186	-3.56326e-05	70.7115	0.193532	0.881293	0.692408	0.112938	0.981847	0.465674	0.976845	3.05969	1.44791	1854.92	18.4725	1823.88	23.0094	1.92091
LM16-20	212.375	184.492	0.000200869	19.5565	0.23919	1.00884	3.32944	0.114229	1.02056	0.2508	0.746024	3.03061	1.20063	1824.16	20.9101	1833.24	19.1822	-0.572142
LM16-21	127.504	97.9975	0.000156443	26.7275	0.243799	0.781481	0.524417	0.114515	0.770652	0.242003	1.03701	3.02296	1.28574	1838.56	16.9277	1838.38	20.5915	0.01158
LM16-22	274.661	179.979	4.95883e-05	33.3339	0.0153985	0.727888	1.36515	0.114484	0.542232	0.200492	0.795487	2.97159	1.1569	1861.2	10.4742	1868.67	18.7718	-0.462203
LM16-23	131.887	62.1114	6.09112e-05	40.8257	-0.1763	0.760613	0.499188	0.112925	0.742318	0.140088	1.27781	2.9739	1.25895	1833.75	14.6118	1867.12	20.4177	-2.09608
LM16-24	201.406	180.432	0.000248599	41.1671	-0.00721343	0.815087	2.37423	0.114528	0.598682	0.274145	0.761179	2.96531	1.19382	1818.5	25.3408	1867.11	19.5218	-3.07924
LM16-25	180.479	157.036	1.50437e-05	70.711	-0.213254	0.755571	1.44137	0.112769	0.639611	0.261411	0.823228	2.97018	1.20418	1841.24	11.83	1870.3	19.5507	-1.81848
LM16-26	53.7288	43.5459	0.000297186	30.1541	0.493029	0.818493	2.23866	0.119532	1.18437	0.257501	2.95685	2.93274	1.60331	1888.14	29.1187	1883.87	26.2889	0.261159
LM16-27	145.062	178.07	8.33246e-05	35.3563	-0.167592	0.705703	0.491633	0.11431	0.745402	0.399591	0.799526	2.93653	1.2544	1851.16	15.0405	1887.16	20.5357	-2.24331
LM16-28	258.891	195.932	0.000251176	20.4141	0.0329826	0.479693	2.50671	0.116297	0.745227	0.250134	1.64124	2.92424	1.8072	1846.68	17.8441	1889.79	29.63	-2.69377
LM16-29	131.719	159.717	3.63606e-05	57.7357	-0.317654	0.96277	0.660255	0.114808	0.81779	0.374372	0.886872	2.89154	1.35307	1869.16	15.4838	1913.77	22.4109	-2.7584
LM16-30	410.634	1467.08	0.000375053	12.7749	4.97054	0.52691	1.15214	0.118684	0.509718	0.299582	0.630367	5.02187	1.11089	1857.7	14.2149	1163.87	11.8609	40.7559
LM16-31	402.473	308.852	0.000220107	20.1264	3.89408	0.510056	2.97769	0.11102	0.965075	0.374904	0.646564	4.91431	1.3615	1766.15	20.8924	1190	14.8165	35.6763
LM16-32	287.558	157.662	0.0011801	6.52728	4.30856	1.01934	0.61337	0.129355	1.49282	0.202403	0.737206	3.72129	1.16314	1853.82	35.6898	1508.17	15.7344	20.8898
LM16-33	250.384	109.551	0.00133538	9.40925	3.64507	0.417511	1.66212	0.127881	6.61812	0.181012	2.56063	3.5271	13.7244	1794.5	146.427	1578.48	192.174	13.5621
LM16-34	84.0418	66.9601	0.000379917	18.6435	1.58355	1.0172	2.36879	0.114109	0.840682	0.260906	1.08802	3.41677	1.37961	1781.7	22.9067	1646.06	20.109	8.62255
LM16-35	135.114	116.955	0.000136587	26.1128	1.29802	0.850088	1.62393	0.112981	0.708413	0.269728	0.902874	3.36959	1.25327	1817.91	15.3147	1672.09	18.4773	9.10242
LM16-36	130.828	121.144	0.000307125	19.6136	1.54571	0.733387	0.530505	0.115179	0.794787	0.314517	0.952154	3.35893	1.73137	1815.99	20.1786	1672.76	25.5481	8.95027
LM16-37	151.619	222.683	0.00226515	16.635	1.67396	0.662006	2.289	0.120231	2.24812	0.47217	0.896319	3.20203	1.33343	1397.75	132.227	1697.19	21.9043	-24.3918
LM16-38	95.0025	98.3738	0.000259833	22.3626	1.09166	0.968743	1.78368	0.117244	0.822487	0.306709	1.00245	3.14743	1.36645	1859.86	19.8328	1772.26	21.2206	5.38546
LM16-39	182.821	183.478	6.73598e-06	100	0.59102	0.967157	2.78402	0.114476	0.978783	0.294809	0.742565	3.10953	1.21701	1870.22	17.7298	1797.33	19.0898	4.4648
LM16-40	176.194	174.792	0.000232414	19.8218	0.648533	1.12623	0.943824	0.115593	0.606618	0.288462	0.756942	3.08761	1.24578	1839.34	15.1632	1802.92	19.6256	2.26954
LM16-41	273.324	195.23	0.000194374	18.5887	0.307059	0.811745	1.16072	0.112729	0.561956	0.229314	0.85689	3.09454	1.21475	1800.91	13.2767	1800.33	19.1017	0.0369326
LM16-42	115.094	96.9906	0.00101178	29.6656	1.14188	0.676899	1.60799	0.120776	0.876982	0.279018	1.1309	3.04425	1.33357	1748.94	73.3913	1805.94	22.291	-3.73789
LM16-43	221.169	189.318	2.2746e-05	50.0004	0.40517	0.940337	2.37045	0.114467	0.553423	0.253272	0.728827	3.06322	1.18666	1866.66	10.3078	1820.61	18.8238	2.83112
LM16-44	187.369	175.436	0.000141367	21.3211	0.219859	1.04239	2.77822	0.112914	0.590168	0.269884	0.752288	3.06689	1.52098	1815.82	12.8145	1815.79	24.0805	0.00203594
LM16-45	325.574	316.585	1.62514e-05	50.0003	0.151438	0.85152	0.369983	0.113303	0.874906	0.294868	0.572349	3.03818	1.13627	1849.55	15.9532	1833.83	18.1368	0.976477
LM16-46	122.194	142.709	3.18363e-05	57.7356	0.120957	0.875113	2.16018	0.113192	0.759289	0.339285	1.83024	3.03436	1.29287	1844.38	14.3639	1835.45	20.6558	0.556313
LM16-47	139.461	114.8	8.24289e-05	31.6236	0.0919411	0.976757	1.96518	0.113883	0.663514	0.241699	0.891402	3.00662	1.25525	1844.51	13.3954	1848.92	20.1873	-0.275006
LM16-48	124.62	180.609	5.91573e-05	40.8256	0.128454	0.999503	2.12339	0.114344	0.723813	0.417336	0.760162	3.00128	1.30124	1856.91	14.1684	1852.35	20.9584	0.282532
LM16-49	138.892	129.177	0.000221268	20.853	0.117047	0.896727	1.09283	0.114343	0.72078	0.270028	0.916453	2.99869	1.27707	1821.52	16.9111	1849.7	20.5675	-1.77985
LM16-50	119.197	102.901	0.000291325	21.3221	0.625019	0.814993	3.73197	0.119402	0.84298	0.265998	1.08121	2.96535	1.38269	1887.34	20.4987	1866.01	22.4568	1.30173
LM16-51	210.012	361.91	3.20648e-05	44.7218	-0.0401726	0.809644	0.405207	0.114063	0.58716	0.519617	0.559201	2.97138	1.18864	1858.26	11.0886	1869.22	19.2904	-0.67949
LM16-52	161.342	181.058	9.52292e-05	27.7359	-0.125003	0.888169	1.37021	0.113774	0.625775	0.330596	0.728619	2.96089	1.21959	1839.97	12.8379	1873.38	19.8383	-2.09256
LM16-53	174.465	111.662	0.000895223	21.6068	1.06596	0.846525	1.38876	0.124568	0.629592	0.220158	0.913829	2.9152	1.2304	1839.68	44.5541	1878.49	20.6451	-2.43244
LM16-54	132.296	114.502	0.000270427	18.8999	0.34085	0.884154	0.512607	0.118108	0.707906	0.25873	0.934054	2.93981	1.27523	1871.41	17.1456	1880.61	20.8406	-0.566646
LM16-55	101.93	50.823	1.17805e-05	100	0.0163827	0.990746	2.57171	0.115677	0.788349	0.144672	1.35722	2.93792	1.34683	1887.98	14.4259	1888.19	22.0468	-0.0128033
LM16-56	200.866	94.598	0.000218917	17.5577	0.575843	1.07614	2.66185	0.121923	0.546461	0.137518	0.967673	2.88474	1.2049	1941.07	12.7057	1913.01	19.9684	1.67014
LM16-57	247.325	112.015	-4.97243e-06	100	-0.17571	0.886464	1.80575	0.120699	0.50314	0.134598	0.909543	2.77121	1.1634	1967.56	9.01946	1986.35	19.8884	-1.10944
LM16-58	134.21	61.9588	0.000122536	33.3347	2.3238	0.532372	0.513116	0.106526	0.880989	0.173009	1.33719	4.17882	1.24834	1711.62	19.2119	1380.56	15.5361	21.467
LM16-59	121.444	98.6468	0.000150207	28.869	0.414796	0.676513	0.532232	0.107947	0.836517	0.248924	1.08179	3.29398	1.27936	1729.92	18.7572	1705.5	19.1992	1.60642
LM16-60	182.161	340.418	2.38968e-05	50.0004	0.372267	1.06228	1.58214	0.114414	0.566846	0.542577	0.534787	3.05684	1.20821	1865.58	10.5764	1823.89	19.1957	2.56523
LM16-61	157.154	86.1231	7.00495e-05	33.3341	0.175458	0.877194	1.52373	0.113265	0.64643	0.166201	1.71466	3.0451	1.22808	1837.25	12.8721	1828.87	19.5636	0.523762
LM16-62	153.541	152.598	8.11627e-06	100	0.0194734	0.831007	0.515932	0.112716	0.662633	0.290429	0.81363	3.02491	1.23054	1841.89	12.136	1841.03	19.7078	0.053638
LM16-63	75.8831	81.7017	8.32701e-05	44.7226	0.18106	0.857032	1.96776	0.114562	0.948116	0.322407	1.11224	3.00692	1.41427	1855.19	19.0939	1848.74	22.75	0.400368
LM16-64	263.228	288.338	4.05433e-05	35.3558	-0.106777	0.806	1.36018	0.114198	0.5203	0.327823	0.60976	2.95282	1.15558	1858.6	9.93815	1879.2	18.8404	-1.27802
LM16-65	213.734	239.817	5.26912e-05	33.3339	-0.205205	0.886173	1.33452	0.113354	0.561137	0.329888	0.654865	2.95525	1.18457	1842.47	10.9175	1877.55	19.3	-2.19539
LM16-66	126.315	171.137	0.00050782	20.855	0.388096	0.594459	0.673152	0.123929	1.04669	0.443142	1.10973	2.7968	1.52602	1912.59	29.7263	1957.41	25.9074	-2.71738
LM16-67	140.975	176.29	8.24831e-05	31.6236	0.0717801	0.937718	1.64599	0.121086	0.647311	0.37563	0.729804	2.80731	1.25435	1955.95	12.785	1962.07	21.2292	-0.362951
1Ages corrected using measured 204Pb
	Grains excluded from the analysis due Pb loss

## Sheet: Standards
206Pb/238U Standard Ages (Ma)
Sample MJ17-1(1)B			Sample MAR17-2(8)			Sample CP17-02B			Sample MAR17-2(6)			Sample MJ17-1(9)			Sample TQ-18			Sample MRB-17-2(2)			Sample NR 123			Sample LM16
ID	Age	2s	ID	Age	2s	ID	Age	2s	ID	Age	2s	ID	Age	2s	ID	Age	2s	ID	Age	2s	ID	Age	2s	ID	Age	1s
91500			91500			91500			91500			91500			91500			91500			91500			TEMORA
Z_91500_1	1068	26	Z_91500_1	1055	23	Z_91500_1	1057	20	Z_91500_1	1068	17	Z_91500_1	1061	33	Z_91500_1	1070	30	Z_91500_1	1059	30	Z_91500_1	1052	26	TEM-1.1	415.074	1.56937
Z_91500_2	1078	26	Z_91500_2	1069	25	Z_91500_2	1062	20	Z_91500_2	1066	17	Z_91500_2	1116	40	Z_91500_2	1027	28	Z_91500_2	1022	31	Z_91500_2	1061	25	TEM-2.1	415.386	2.50624
Z_91500_3	1079	25	Z_91500_3	1069	24	Z_91500_3	1052	20	Z_91500_3	1056	18	Z_91500_3	1031	31	Z_91500_3	1078	31	Z_91500_3	1096	32	Z_91500_3	1048	25	TEM-5.1	412.332	2.4909
Z_91500_4	1054	25	Z_91500_4	1072	22	Z_91500_4	1066	20	Z_91500_4	1053	18	Z_91500_4	1062	30	Z_91500_4	1071	32	Z_91500_4	1055	32	Z_91500_4	1049	25	TEM-7.1	420.826	2.24768
Z_91500_5	1049	24	Z_91500_5	1031	21	Z_91500_5	1077	21	Z_91500_5	1061	17	Z_91500_5	1086	33	Z_91500_5	1033	32	Z_91500_5	1073	35	Z_91500_5	1059	27	TEM-9.1	407.906	2.54275
Z_91500_6	1036	23	Z_91500_6	1081	25	Z_91500_6	1066	20	Z_91500_6	1060	17	Z_91500_6	1038	30	Z_91500_6	1035	32	Z_91500_6	1054	32	Z_91500_6	1085	26	TEM-10.1	411.384	2.48687
Z_91500_7	1039	23	Z_91500_7	1077	22	Z_91500_7	1054	20	Z_91500_7	1062	19	Z_91500_7	1051	33	Z_91500_7	1100	35	Z_91500_7	1015	33	Z_91500_7	1084	27	TEM-11.1	410.33	5.87573
Z_91500_8	1065	25	Z_91500_8	1058	21	Z_91500_8	1077	21	Z_91500_8	1062	17	Z_91500_8	1043	28	Z_91500_8	1049	33	Z_91500_8	1063	36	Z_91500_8	1054	26	TEM-12.1	420.461	2.81014
Z_91500_9	1077	25	Z_91500_9	1076	24	Z_91500_9	1037	19	Z_91500_9	1066	18	Z_91500_9	1079	35	Z_91500_9	1068	33	Z_91500_9	1038	34	Z_91500_9	1059	27	TEM-14.1	410.574	2.35315
Z_91500_10	1044	23	Z_91500_10	1058	23	Z_91500_10	1074	21	Z_91500_10	1055	17	Z_91500_10	1047	33	Z_91500_10	1069	35	Z_91500_10	1053	34	Z_91500_10	1056	28	TEM-15.1	424.432	1.7409
Z_91500_11	1091	25	Z_91500_11	1050	21	Z_91500_11	1056	20	Z_91500_11	1048	17	Z_91500_11	1019	35	Z_91500_11	1029	35	Z_91500_11	1042	35	Z_91500_11	1041	30	TEM-16.1	421.179	3.10961
Z_91500_12	1045	25	Z_91500_12	1041	20	Z_91500_12	1064	20	Z_91500_12	1070	17	Z_91500_12	1020	32	Z_91500_12	1061	35	Z_91500_12	1016	34	Z_91500_12	1070	30	TEM-12.2	411.934	2.92782
Z_91500_13	1092	26	Z_91500_13	1045	22	Z_91500_13	1055	20	Z_91500_13	1063	18	Z_91500_13	1054	33	Z_91500_13	1047	35	Z_91500_13	1088	40	Z_91500_13	1035	29	TEM-17.1	417.912	1.67079
Z_91500_14	1028	25	Z_91500_14	1069	23	Z_91500_14	1067	21	Z_91500_14	1065	17	Z_91500_14	1086	35	Z_91500_14	1066	32	Z_91500_14	1060	38	Z_91500_14	1075	31	TEM-18.1	417.481	1.69109
Z_91500_15	1041	28	Z_91500_15	1053	22	Z_91500_15	1057	20	Z_91500_15	1058	18	Z_91500_15	1073	39	Z_91500_15	1022	32	Z_91500_15	1038	38	Z_91500_15	1055	29	TEM-19.1	417.535	2.80234
Z_91500_16	1062	28	Z_91500_16	1057	21	Z_91500_16	1059	20	Z_91500_16	1066	18	Z_91500_16	1066	36	Z_91500_16	1050	34	Z_91500_16	1073	38	Z_91500_16	1078	31	TEM-20.1	425.568	3.34878
Z_91500_17	1053	27	Z_91500_17	1050	23	Z_91500_17	1058	19	Z_91500_17	1058	17	Z_91500_17	1082	34	Z_91500_17	1071	34	Z_91500_17	1040	40	Z_91500_17	1046	30	TEM-22.1	417.567	2.81925
Z_91500_18	1070	29	Z_91500_18	1080	22	Z_91500_18	1058	22	Z_91500_18	1059	19	Z_91500_18	1118	37	Z_91500_18	1014	34	Z_91500_18	1075	39	Z_91500_18	1052	31	TEM-23.1	422.847	2.18038
Z_91500_19	1073	28	Z_91500_19	1060	22	Z_91500_19	1045	20	Z_91500_19	1077	20	Z_91500_19	1025	39	Z_91500_19	1064	38	Z_91500_19	1051	40	Z_91500_19	1058	32	TEM-24.1	414.716	3.67279
Z_91500_20	1051	27	Z_91500_20	1107	23	Z_91500_20	1070	22	Z_91500_20	1056	19	Z_91500_20	1055	37	Z_91500_20	1079	39	Z_91500_20	1034	39	Z_91500_20	1042	30
Z_91500_21	1046	28	Z_91500_21	1052	23	Z_91500_21	1072	20	Z_91500_21	1052	19	Z_91500_21	1035	38	Z_91500_21	1038	38	Z_91500_21	1052	40	Z_91500_21	1066	31
Z_91500_22	1056	28	Z_91500_22	1060	23	Z_91500_22	1076	21	Z_91500_22	1065	19	Z_91500_22	1013	41	Z_91500_22	1083	38	Z_91500_22	1051	34	Z_91500_22	1072	31
Z_91500_23	1057	29	Z_91500_23	1041	23	Z_91500_23	1047	22	Z_91500_23	1055	19	Z_91500_23	1048	41	Z_91500_23	1012	36	Z_91500_23	1065	34	Z_91500_23	1052	30
Z_91500_24	1056	29	Z_91500_24	1066	22	Z_91500_24	1049	21	Z_91500_24	1077	20	Z_91500_24	1096	41	Z_91500_24	1086	40	Z_91500_24	1031	34	Z_91500_24	1054	30
Z_91500_25	1064	28	Z_91500_25	1066	22	Z_91500_25	1066	21	Z_91500_25	1059	23	Z_91500_25	1076	40	Z_91500_25	1037	38	Z_91500_25	1059	35	Z_91500_25	1054	30
Z_91500_26	1069	30	Z_91500_26	1056	24	Z_91500_26	1064	19	Z_91500_26	1050	21	Z_91500_26	1032	38	Z_91500_26	1045	33	Z_91500_26	1043	37	Z_91500_26	1055	28
Z_91500_27	1081	28	Z_91500_27	1057	23	Z_91500_27	1038	20	Z_91500_27	1055	22	Z_91500_27	1066	40	Z_91500_27	1067	38	Z_91500_27	1022	36	Z_91500_27	1060	30
Z_91500_28	1067	30	Z_91500_28	1070	23	Z_91500_28	1068	21	Z_91500_28	1078	23	Z_91500_28	1078	42	Z_91500_28	1038	36	Z_91500_28	1052	39	Z_91500_28	1057	30
Z_91500_29	1025	29	Z_91500_29	1068	22	Z_91500_29	1053	20	Z_91500_29	1060	24	Z_91500_29	1026	39	Z_91500_29	1055	36	Z_91500_29	1068	38	Z_91500_29	1026	30
Z_91500_30	1057	31	Z_91500_30	1049	23	Z_91500_30	1063	21	Z_91500_30	1058	25	Z_91500_30	1057	39	Z_91500_30	1060	38	Z_91500_30	1029	36	Z_91500_30	1067	30
Z_91500_31	1076	31	Z_91500_31	1062	23	Z_91500_31	1085	21	Z_91500_31	1064	25	Z_91500_31	1040	37	Z_91500_31	1050	33	Z_91500_31	1052	43	Z_91500_31	1053	31
Z_91500_32	1073	32	Z_91500_32	1046	23	Z_91500_32	1058	22	Z_91500_32	1054	24	Z_91500_32	1026	38	Z_91500_32	1046	34	Z_91500_32	1041	42	Z_91500_32	1062	31
Z_91500_33	1037	28	Z_91500_33	1077	23	Z_91500_33	1060	22	Z_91500_33	1039	25	Z_91500_33	1020	39	Z_91500_33	1048	33	Z_91500_33	1110	48	Z_91500_33	1034	29
Z_91500_34	1068	31	Z_91500_34	1062	24	Z_91500_34	1068	20	Z_91500_34	1088	25	Z_91500_34	1091	38	Z_91500_34	1041	35	Z_91500_34	1084	47	Z_91500_34	1067	31
Z_91500_35	1051	28	Z_91500_35	1036	22	Z_91500_35	1052	21	Z_91500_35	1057	25	Z_91500_35	1055	43	Z_91500_35	1037	35	Z_91500_35	1083	39	Z_91500_35	1050	30
Z_91500_36	1060	30	Z_91500_36	1052	22	Z_91500_36	1078	21	Z_91500_36	1056	25	Z_91500_36	1063	41	Z_91500_36	1084	37	Z_91500_36	1014	35	Z_91500_36	1072	29
Z_91500_37	1045	30	Z_91500_37	1043	22	Z_91500_37	1035	20	Z_91500_37	1062	26	Z_91500_37	1055	46	Z_91500_37	1045	33	Z_91500_37	1034	34	Z_91500_37	1049	29
Z_91500_38	1034	28	Z_91500_38	1093	25	Z_91500_38	1058	20	Z_91500_38	1063	26	Z_91500_38	999	49	Z_91500_38	1113	40	Z_91500_38	1043	36	Z_91500_38	1078	30
Z_91500_39	1071	30	Z_91500_39	1073	25	Z_91500_39	1060	21	Z_91500_39	1044	27	Z_91500_39	1080	41	Z_91500_39	1035	37	Z_91500_39	1059	35	Z_91500_39	1102	32
Z_91500_40	1060	30	Z_91500_40	1069	24	Z_91500_40	1066	22	Z_91500_40	1047	26	Z_91500_40	1084	40	Z_91500_40	1016	36	Z_91500_40	1051	37	Z_91500_40	1066	30
Z_91500_41	1088	31	Z_91500_41	1080	24	Z_91500_41	1050	21	Z_91500_41	1106	30	Z_91500_41	1058	39	Z_91500_41	1035	37	Z_91500_41	1058	37	Z_91500_41	1045	31
Z_91500_42	1036	31	Z_91500_42	1035	24	Z_91500_42	1062	24	Z_91500_42	1050	29	Z_91500_42	1058	37	Z_91500_42	1026	35	Z_91500_42	1039	36	Z_91500_42	1047	31
Z_91500_43	1067	30	Z_91500_43	1060	22	Z_91500_43	1053	23	Z_91500_43	1083	30	PEIXE			Z_91500_43	1074	38	Z_91500_43	1065	34	Z_91500_43	1072	29
Z_91500_44	1048	29	Z_91500_44	1056	23	Z_91500_44	1076	24	Z_91500_44	1034	31	Peixe_1	574	26	Z_91500_44	1056	39	Z_91500_44	1046	34	Z_91500_44	1056	30
Z_91500_45	1055	29	Z_91500_45	1039	22	PEIXE			Z_91500_45	1037	26	Peixe_2	568	27	Z_91500_45	1091	39	Z_91500_45	1028	33	Z_91500_45	1028	29
Z_91500_46	1068	29	Z_91500_46	1067	23	Peixe_1	581	17	Z_91500_46	1066	30	Peixe_3	564	27	Z_91500_46	1053	42	Z_91500_46	1060	33	Z_91500_46	1078	31
Z_91500_47	1054	28	Z_91500_47	1064	23	Peixe_2	585	16	Z_91500_47	1041	27	Peixe_4	569	26	Z_91500_47	1009	36	Z_91500_47	1074	33	Z_91500_47	1038	32
PLESOVICE			Z_91500_48	1074	24	Peixe_3	565	16	Z_91500_48	1094	30	Peixe_5	561	26	PEIXE			Z_91500_48	1060	33	Z_91500_48	1080	33
PLESOVICE_1	314.9	8.7	PEIXE			Peixe_4	565	12	PEIXE			Peixe_6	560	24	Peixe_1	541	13	PEIXE			PEIXE
PLESOVICE_2	333.5	8.7	Peixe_1	558	14	Peixe_5	590	12	Peixe_1	565	20	Peixe_7	569	19	Peixe_2	551	13	Peixe_1	554	15	Peixe_1	573	15
PLESOVICE_3	327.7	9.2	Peixe_2	571	15	Peixe_6	583	11	Peixe_2	549	18	Peixe_8	573	21	Peixe_3	553	13	Peixe_2	560	15	Peixe_2	573	15
PLESOVICE_4	324.1	8.8	Peixe_3	568	13	Peixe_7	596	12	Peixe_3	570	17	Peixe_9	595	21	Peixe_4	547	13	Peixe_3	576	16	Peixe_3	578	16
PLESOVICE_5	319.4	9.3	Peixe_4	570	11	Peixe_8	588	12	Peixe_4	565	17	Peixe_10	558	22	Peixe_5	534	14	Peixe_4	540	15	Peixe_4	562	15
PLESOVICE_6	329	8.9	Peixe_5	566	14	Peixe_9	567	15	Peixe_5	590	17	Peixe_11	568	19	Peixe_6	551	14	Peixe_5	556	16	Peixe_5	595	15
PLESOVICE_7	343.4	9.6	Peixe_6	566	10	Peixe_10	584	15	Peixe_6	577	19	Peixe_12	569	25	Peixe_7	537	12	Peixe_6	560	15	Peixe_6	580	15
PLESOVICE_8	334.9	9.1	Peixe_7	558	11	Peixe_11	580	16	Peixe_7	585	18	Peixe_13	557	23	Peixe_8	528	13	Peixe_7	561	15	Peixe_7	585	16
PLESOVICE_9	342.3	9.7	Peixe_8	559	11	Peixe_12	590	18	Peixe_8	561	17	Peixe_14	584	21	Peixe_9	574	14	Peixe_8	576	16	Peixe_8	558	15
PLESOVICE_10	338.1	9.6	Peixe_9	555	15	Peixe_13	584	16	Peixe_9	570	21				Peixe_10	555	14	Peixe_9	568	16	Peixe_9	576	16
			Peixe_10	563	11	Peixe_14	593	16	Peixe_10	567	22				Peixe_11	572	14	Peixe_10	538	15	Peixe_10	582	16
			Peixe_11	558	14	Peixe_15	593	12	Peixe_11	568	20				Peixe_12	547	13	Peixe_11	560	16	Peixe_11	596	17
			Peixe_12	556	14				Peixe_12	603	19				Peixe_13	560	14	Peixe_12	559	15	Peixe_12	572	16
			Peixe_13	571	12				Peixe_13	590	16				Peixe_14	554	15	Peixe_13	560	15	Peixe_13	559	15
			Peixe_14	580	15				Peixe_14	581	17				Peixe_15	547	13	Peixe_14	556	14	Peixe_14	587	16
			Peixe_15	551	15				Peixe_15	588	20							Peixe_15	560	15	Peixe_15	561	16

[truncated: 1 more sheets: G49134]
